# Supplementary material for: Invariant Distribution of Promoter Activities in Escherichia coli
Source: PLoS Comput Biol. 2009 Oct 23;5(10):e1000545. doi: 10.1371/journal.pcbi.1000545 (PMC2758578; doi:10.1371/journal.pcbi.1000545)
Supplement: Dataset S2 — All of the data at α = 0.8 and α = 0.25 divisions per hour, including mean, standard deviation and CV for all values greater than zero. (0.39 MB XLS) [file pcbi.1000545.s022.xls]

## Sheet: CV_table
Gene	Mean PA at 0.8	std at 0.8	CV at 0.8	PA glucose at 0.8	PA no glucose at 0.8	PA no AA at 0.8	PA phosphate limitation 0.8	PA nitrogen limitation 0.8	PA ethanol 0.8	Gene	mean PA at 0.25	std at 0.25	CV at 0.25	PA glucose at 0.25	PA no glucose at 0.25	PA no AA at 0.25	PA phosphate limitation 0.25	PA nitrogen limitation 0.25	PA ethanol 0.25
rihC	73.89	0	0	0	0	23.71	0	73.89	29.68	rihC	74.05	0	0	0	0	10.49	0	74.05	24.1
hisL	1584.01	303.04	0.19	1730.13	2000.75	1191.56	1498.06	1764.45	1319.09	hisL	764.57	175.56	0.23	439.09	784.7	798.37	736.51	936.21	892.51
ilvL	1139.42	219.64	0.19	1208.72	1303.55	794.03	1130.12	1403.45	996.66	ilvL	708.69	177.84	0.25	564	531.02	788.82	592.16	784.92	991.21
amiC	113.62	27.07	0.24	0	89.43	87.58	136.87	146.64	107.59	amiC	71.49	30.44	0.43	0	12.22	43.89	54.17	106.63	53.66
argI	100.84	32.34	0.32	16.36	9.48	123.7	27.48	77.97	37.76	argI	81.24	8.71	0.11	22.18	7.57	75.08	26.25	87.4	32.4
glnB	111.72	33.71	0.3	90.3	104.11	73.46	112.5	172.27	117.7	glnB	80.18	23.41	0.29	75.62	29.23	39.36	43.25	105.53	59.38
tktB	78.62	40.16	0.51	34.29	0	50.23	0	107.02	26.47	tktB	84.11	0	0	47.71	0	11.96	0	84.11	23.88
lacZ	50.84	0	0	50.84	0.53	14.94	29.59	6.61	38.5	lacZ	63.21	0	0	39.57	14.08	38.22	24.19	63.21	45.82
yabP	70.38	8.3	0.12	76.25	0	23.52	26.59	64.51	30.99	yabP	77.66	11.07	0.14	69.83	0	19.91	18.94	85.49	27.93
cysK	274.57	102.15	0.37	449.5	214.98	288.97	217.94	160.78	315.23	cysK	140.43	74.91	0.53	124.32	60.15	134.22	78.49	178.28	267.1
ilvC	238.8	156.43	0.66	102.57	41.59	345.72	205.8	450.05	89.87	ilvC	235.77	132.21	0.56	155.93	163.64	218.95	82.58	407.58	385.96
lysA	61.75	8.68	0.14	66.24	15.27	28.51	50.82	70.7	59.24	lysA	77.68	21.86	0.28	91.72	25.63	56.1	58.74	107.36	74.49
yaaA	64.28	17.52	0.27	76.67	25.99	20.04	0	44.42	51.89	yaaA	74.84	23.12	0.31	58.49	1.55	33.33	0	91.18	43.38
aroF	NaN	NaN	NaN	49.58	3.28	48.97	28.49	17.62	42.95	aroF	107.22	34.01	0.32	131.04	0	78.06	38.18	141.82	77.97
pfkA	89.1	50.71	0.57	177.81	70.69	67.51	50.16	31	79.33	pfkA	91.91	32.87	0.36	141.65	75.69	55.74	63.02	111.32	104.02
eno	81.4	0	0	81.4	0	0	0	21.15	10.15	eno	68.71	8.33	0.12	74.6	0	20.51	0	62.82	24.33
yabI	76.18	0	0	40.88	0	46.39	0	76.18	32.2	yabI	72.42	17.3	0.24	60.19	0	14.59	0	84.65	28.4
pheL	548.62	233.54	0.43	589.13	376.1	1003.15	443.35	443.31	436.7	pheL	606.24	231.6	0.38	424.6	403.73	658.79	421.68	754.39	974.22
serA	537.54	168.43	0.31	606.23	339.55	619.19	466.37	795.86	398.03	serA	656.19	234.82	0.36	589.46	397.71	721.32	415.03	816.18	997.42
b3007	207.81	51.94	0.25	292.73	138.27	191.88	181.48	229.39	213.12	b3007	217.76	83.41	0.38	285.99	79.12	268.03	178.32	297.8	197.33
yaaH	177.86	68.72	0.39	256.38	187.85	55.05	185.72	221.55	160.61	yaaH	151.39	49.15	0.32	162.59	125.33	89.23	135.4	160.3	235.5
U66	NaN	NaN	NaN	0	0	0	0	0	0	U66	NaN	NaN	NaN	0	0	0	0	0	0
edd	NaN	NaN	NaN	0	0	12.86	14.52	0	22.19	edd	71.79	0	0	0	0	13.78	10.14	71.79	23.15
rpiA	158.03	90.35	0.57	275.57	79.81	49.55	78.27	125.63	230.89	rpiA	107.08	34.7	0.32	157.41	66.6	86.94	80.44	130.56	120.52
ilvI	71.08	14.08	0.2	80.99	0	54.97	31.31	77.29	36.58	ilvI	86.11	4.5	0.05	82.93	0	24.28	32.51	89.3	33.13
dapF	204.3	93.45	0.46	374.42	156.04	114.14	145.19	232.13	203.87	dapF	104.86	38.71	0.37	110.07	77.72	75.75	66.91	133.89	164.86
metE	196.23	125.84	0.64	45.5	5.21	285.21	42.69	107.24	20.48	metE	94.75	42.82	0.45	92.52	14.95	120.81	51.17	152.34	56.9
aer	85.78	26.17	0.31	67.27	0	33.31	38.56	104.28	25.82	aer	70.85	14.36	0.2	60.7	0	20.55	21.2	81.01	34.44
yaaI	107.63	0	0	0	0	32.23	1.48	107.63	35.31	yaaI	81.65	0	0	0	0	37.45	14.61	81.65	26.87
serA	NaN	NaN	NaN	0	0	0	0	0	0	serA	NaN	NaN	NaN	0	0	0	0	0	0
ylbE	59.15	0	0	59.15	0	42.93	0	0	30.62	ylbE	69.28	10.86	0.16	61.6	0	23.71	0	76.96	21.76
glcB	79.76	8.74	0.11	85.94	0	73.58	0	24.38	36.3	glcB	68.04	7.82	0.11	62.51	0	24.81	0	73.57	33.58
secM	482.76	85.33	0.18	653.13	469.36	467.68	424.58	447.66	434.17	secM	164.88	28.92	0.18	186.52	136.64	133.11	150.31	179.22	203.46
tyrB	93.03	0.27	0	92.84	32.19	16.08	0.6	93.22	25.88	tyrB	92.25	18.91	0.2	78.88	25.49	41.48	21.02	105.62	48.09
metB	94.66	0	0	0.38	0	0	0	94.66	33.57	metB	81.31	17.69	0.22	68.8	0	20.95	0	93.82	36.88
asnC	61.86	0	0	61.86	0	7.29	0	48.21	8.98	asnC	69.38	1.26	0.02	68.49	0	22.38	0	70.28	41.32
yacH	NaN	NaN	NaN	0	0	0	0	34.99	1.68	yacH	75.54	0	0	0	0	0	0	75.54	18.97
argD	100.13	30.64	0.31	66.17	0	125.72	29.38	108.5	43.88	argD	80.79	7.4	0.09	75.56	0	18.06	14.68	86.02	36.27
ylbF	80.48	0	0	80.48	0	39.24	15.85	24.64	18.02	ylbF	69.17	3.53	0.05	71.66	0	9.83	14.54	66.68	23.14
rpe	61.85	0	0	61.85	0	0	0	0	18.16	rpe	69.97	0.12	0	70.06	0	0	13	69.88	25.17
yacL	87.32	23.67	0.27	108.87	35.16	25.87	40.28	91.11	61.98	yacL	77.37	19.61	0.25	76.92	4.82	34.09	18.53	97.2	57.99
cueO	77.35	1.42	0.02	76.35	0	12.55	10.03	78.36	18.61	cueO	75.2	13.38	0.18	65.74	0	21.03	33.16	84.66	31.64
argC	97.23	70.94	0.73	53.99	0	179.1	0	58.6	12.11	argC	70.68	7.86	0.11	65.12	0	43.71	0	76.23	26.48
yifB	61.31	0	0	61.31	0	14.6	0.85	0	0	yifB	75.28	6.54	0.09	79.91	0	17.51	13.88	70.66	0
argF	69.57	25.02	0.36	40.28	0	87.26	0	51.88	18.79	argF	66.5	1.12	0.02	67.29	0	40.47	0	65.7	25.89
aroK	439.47	172.66	0.39	0	477.74	186.97	0	521.52	571.66	aroK	147.02	28.27	0.19	0	125.5	121.31	0	179.52	161.76
renD	NaN	NaN	NaN	43.93	0	0	0	0	0	renD	58.39	0	0	58.39	0	0	0	0	0
gntR	123.08	0	0	123.08	36.93	28.87	18.43	0	8.48	gntR	72.98	15.84	0.22	65.48	30.39	35.87	40.79	91.17	62.28
proB	134.48	38.75	0.29	182.98	97.47	119.77	114	184.21	108.48	proB	86.23	29.08	0.34	108.47	38.11	58.34	56.92	121.6	85.82
argA	88.79	49.54	0.56	50.4	0	144.71	3.28	71.24	35.28	argA	86.93	0	0	44.78	0	30.49	9.31	86.93	30.77
metA	89.57	40.34	0.45	107.71	72.96	57.92	75.57	163.41	59.89	metA	136.74	65.93	0.48	148.15	57.32	197.59	83.11	225.75	108.52
ilvY	81.35	42.75	0.53	111.58	0	26.88	41.51	51.13	41.58	ilvY	76	4.51	0.06	79.19	0	16.13	26.9	72.82	39.81
aspC	96.92	32.93	0.34	156.86	72.87	74.92	90.43	111.89	74.55	aspC	81.16	28.7	0.35	91.46	16.49	53.27	42.04	116.71	63.18
glnL	65.87	5.36	0.08	69.3	9.38	59.69	0.19	68.63	34.29	glnL	107.31	19.27	0.18	123.68	23.4	49.41	24.54	112.18	86.08
ybcK	62.92	0	0	62.92	0	0	0	30.92	22.65	ybcK	71.79	5.18	0.07	75.45	0	0	17.43	68.13	25.67
tpiA	95.84	0	0	95.84	0.91	35.05	0	0	25.3	tpiA	89.52	32.32	0.36	134.99	47.38	56.91	62.83	107.37	85.5
aroL	142.99	93.32	0.65	139.97	30.58	297.84	59.25	136.48	81.43	aroL	227.71	84.95	0.37	262.43	25.29	210.46	87.08	289.93	288.65
lysR	83.63	30.36	0.36	118.04	51.28	21.11	0	98.91	66.29	lysR	68.74	15.34	0.22	57.9	24.99	28.91	0	79.59	33.62
serB	82.36	11.56	0.14	74.18	11.01	9.1	0	90.53	22.03	serB	67.91	5.8	0.09	63.81	22.92	19.44	0	72.01	30.52
metR	93.92	31.54	0.34	116.43	57.82	134.12	70.62	90.59	44.7	metR	111.71	29.29	0.26	120.47	40.46	114.39	82.86	154.79	86.02
wrbA	131.6	32.16	0.24	186.42	115.98	121.17	103.69	130.73	16.55	wrbA	296.52	88.6	0.3	455.8	234.04	206.27	282.34	272.03	328.6
fruL	73.18	0	0	73.18	0	0	9	0	3.71	fruL	77.08	6.72	0.09	72.32	0	0	12.68	81.83	20.95
ybcL	NaN	NaN	NaN	40.3	0	21.87	0	35.66	13.01	ybcL	65.53	10.73	0.16	57.93	0	25.48	0	73.12	12.22
ykfI	93.16	0	0	93.16	0	0	0.62	22.97	45.63	ykfI	70.92	1.56	0.02	72.02	0	0	10.3	69.82	20.67
serC	260.62	57.27	0.22	296.41	198.29	306.43	215.75	331.72	215.13	serC	137.18	40.4	0.29	166.63	90.36	121.65	95.59	187.73	161.15
metC	71.7	14.45	0.2	61.48	0	0.26	0	81.91	27.41	metC	81.87	4.54	0.06	85.08	0	25.67	0	78.65	42.44
trpR	115.41	52.41	0.45	201.96	81.96	69.56	0	100.59	122.99	trpR	94.16	30.58	0.32	96.46	22.77	64.95	0	135.76	79.45
metJ	107.57	35.1	0.33	147.29	47.04	67.8	40.6	123.98	91.2	metJ	93.77	28.11	0.3	112.83	58.63	67.81	39.05	113.36	116.23
prmB	NaN	NaN	NaN	25.97	0	0	0.69	0	12.64	prmB	66.67	13.03	0.2	57.46	0	0	10.37	75.88	17.63
lpd	459.36	128.25	0.28	629.75	582.26	403.01	342.95	483.09	315.08	lpd	130.89	46.47	0.36	166.92	99.1	126.72	72.55	201.08	118.94
glxK	54.81	0	0	54.81	0	14.09	0	34.88	1.69	glxK	68.61	1.95	0.03	67.23	0	12.7	0	69.99	29.84
yggG	87.85	2.41	0.03	89.56	0	5.42	2.51	30.86	86.15	yggG	67.63	11.89	0.18	75.91	31.1	17.68	18.24	72.97	54
cysB	140.82	39.07	0.28	210.71	108.83	161.97	116.07	117.48	129.88	cysB	86	23.6	0.27	98.49	39.5	68.28	47.03	112.98	64.26
ygjG	150.75	98.07	0.65	108.74	79.11	0	119.54	295.61	36.78	ygjG	164.67	47.83	0.29	151.81	100.94	184.45	189.84	233.83	127.17
U139	NaN	NaN	NaN	0	0	0	0	0	0	U139	NaN	NaN	NaN	0	0	0	0	0	0
argE	59.92	7.63	0.13	28.55	0	54.52	0	65.31	22.35	argE	72.25	3.98	0.06	69.44	0	14.06	0	75.06	10.73
cysP	259.94	158.79	0.61	490	193.58	13.16	128.54	31.08	227.63	cysP	116.05	40.48	0.35	101.73	48.17	68.3	28.44	131.2	162.96
wrbA	NaN	NaN	NaN	0	0	0	0	0	0	wrbA	NaN	NaN	NaN	0	0	0	0	0	0
flgA	89.91	23.22	0.26	106.33	0	2.12	21.85	73.48	20.54	flgA	74.74	0.01	0	74.74	0	17.33	5.61	74.75	37.12
fliC	102	0	0	102	0	0	0	10.93	28.63	fliC	73.21	0.25	0	73.39	0	0	0	73.04	26.83
aroH	168.66	45.15	0.27	210.72	119.14	187.96	122.57	223.81	147.78	aroH	80.28	33.53	0.42	94.64	38.52	51.01	36.5	120.89	54.58
argG	57.07	0	0	38.48	0	0	0	57.07	28.8	argG	74.4	0.21	0	74.55	0	26.7	0	74.25	31.81
pheS	NaN	NaN	NaN	18.27	0	0	0	12.15	0	pheS	69.56	5.93	0.09	65.37	0	0	0	73.75	16.28
yjaB	65.33	0	0	65.33	0	0	0	27.84	0	yjaB	64.98	4.27	0.07	68	0	0	0	61.96	0
dapA	341.08	127.2	0.37	532.87	302.86	194.63	224.31	423.81	368.02	dapA	141.9	43.07	0.3	185.73	108.91	110.96	91.65	164.57	189.57
ptsG	258.75	169.19	0.65	487.93	173.49	149.93	57.45	249.21	434.5	ptsG	155.27	103.77	0.67	124.14	131.9	58.54	20.86	128.99	332.78
gnd	257.8	77.3	0.3	375.81	241.51	159.31	216.81	319.03	234.3	gnd	207.08	59.38	0.29	315.68	175.28	147.54	179.82	227.69	196.48
icd	245.15	76.05	0.31	362.75	217.73	282.8	228	246.82	132.81	icd	146.78	26.68	0.18	156.44	114.26	149.25	116.57	182.36	161.77
Empty	NaN	NaN	NaN	0	0	0	0	0	0	Empty	NaN	NaN	NaN	0	0	0	0	0	0
asnA	85.35	0	0	85.35	0	37.65	0	48.18	21.04	asnA	82.22	8.79	0.11	88.43	0	25.22	0	76	27.2
ybgS	60.37	0	0	60.37	0.13	0	0	0	16.74	ybgS	75.1	0	0	75.1	0.76	4.87	0	0	33.5
ytjB	130.56	42.19	0.32	167.5	79.8	41.88	46.28	163	111.94	ytjB	95.73	21.47	0.22	116.68	49.32	40.43	27.25	96.73	73.77
glyA	334.37	135.38	0.4	560.57	230.93	377.76	172.92	362.12	301.93	glyA	206.03	63.78	0.31	317.71	189.53	165.46	141.43	240.42	181.63
malE	56.78	0	0	56.78	0	0	0	0	0	malE	65.94	1.75	0.03	67.17	0	0	0	64.7	0
mqo	266.47	116.37	0.44	305.72	317.8	197.43	273.54	422.91	81.43	mqo	77.07	29.29	0.38	108.36	44.51	52.71	50.34	108.74	65.18
yegT	62.39	0	0	62.39	0	0	0	0	16.79	yegT	59.37	0	0	59.37	0	0	0	0	16.39
alsI	89.86	0	0	89.86	2.3	36.25	0	0	17.79	alsI	NaN	NaN	NaN	24.55	10.19	9.31	0	0	8.08
leuS	307.14	120.78	0.39	546.41	275.69	255.48	276.14	204.36	284.73	leuS	130.82	35.24	0.27	158.33	129.86	139.53	100.29	81.36	175.53
aroP	151.67	47.18	0.31	130.14	36.05	205.78	21.81	42.38	119.09	aroP	189.71	52.13	0.27	36.89	40.3	183.85	33.89	244.52	140.75
ansB	NaN	NaN	NaN	28.76	0	37.22	0	0	0	ansB	NaN	NaN	NaN	3.17	0	36.83	25.68	0	15.75
yhjJ	72.81	10.38	0.14	80.15	40.1	21.39	26.03	0	65.47	yhjJ	51.11	0	0	46.1	51.11	45.09	32.05	0	49.43
ansA	113.09	48.95	0.43	169.04	11.12	78.19	44.41	0	92.03	ansA	68.41	13.23	0.19	57.59	67.4	64.46	61.45	0	91.17
cspG	159.48	60.33	0.38	116.82	34.58	202.14	5.99	0	21.55	cspG	79.11	0	0	48.46	79.11	42.73	44.3	0	23.72
lacZ	NaN	NaN	NaN	0	0	0	0	0	0	lacZ	NaN	NaN	NaN	0	0	0	0	0	0
talB	222.66	114.1	0.51	312.98	123.32	198.88	110.72	0	367.42	talB	109.54	73.46	0.67	74.65	81.57	81.54	69.32	0	240.64
rluE	258.79	72.43	0.28	289.69	213.53	372.63	203.01	0	215.1	rluE	98.24	29.69	0.3	54.25	108.41	102.9	90.01	0	135.63
ydhZ	105.7	0	0	105.7	0	17.06	1.34	0	41.3	ydhZ	77.67	0	0	35.67	49.31	44.99	21.26	0	77.67
tdcG_2	51.31	0	0	51.31	28.41	32.72	34.69	0	36.68	tdcG_2	NaN	NaN	NaN	8.83	20.55	22.35	4.4	0	0
yhjK	116.33	42.14	0.36	176.91	79.25	106.44	44.68	0	102.73	yhjK	60.53	0	0	27.12	60.53	39.41	19.72	0	39.68
yqjF	NaN	NaN	NaN	0	0.25	2.38	0.76	0	26.18	yqjF	NaN	NaN	NaN	0	0.68	22.31	0.93	0	17.04
intZ	NaN	NaN	NaN	33.57	14.58	5.83	0	0	35.71	intZ	NaN	NaN	NaN	32.4	45.75	30.01	10.75	0	30.59
ycjW	84.37	18.05	0.21	97.13	21.03	16.5	13.54	0	71.61	ycjW	NaN	NaN	NaN	30.02	6.85	16.15	9.87	0	23.01
talA	62.84	12.14	0.19	76.8	47.48	56.88	54.83	0	22.06	talA	63.46	0	0	34.7	36.06	41.25	30.84	0	63.46
alsR	97.64	30.95	0.32	117.25	61.96	32.04	38.77	0	113.71	alsR	NaN	NaN	NaN	24.38	43.09	8.39	18.49	0	41.1
serA	NaN	NaN	NaN	0	0	0	0	0	0	serA	NaN	NaN	NaN	0	0	0	0	0	0
intA	58.22	0	0	58.22	26.97	4.11	33.56	0	34.62	intA	NaN	NaN	NaN	26.76	6.52	17.36	13.25	0	12.88
b3044	50.38	0	0	0	37.46	10.06	27.87	0	50.38	b3044	NaN	NaN	NaN	0	8.69	20.52	5.25	0	28.87
U66	NaN	NaN	NaN	0	0	0	0	0	0	U66	NaN	NaN	NaN	0	0	0	0	0	0
sscR	107.71	47.9	0.44	184.76	99.57	59.9	78.9	0	115.42	sscR	NaN	NaN	NaN	39.32	39.3	30.99	0.86	0	19.83
yncD	NaN	NaN	NaN	28.09	40.1	22.72	27.04	0	42.33	yncD	NaN	NaN	NaN	3	0	10.04	13.96	0	21.51
pfkB	88.34	22.8	0.26	116.61	88.17	99.82	82.06	0	55.03	pfkB	81.24	19.25	0.24	81.77	70.85	68.66	70.5	0	114.4
maeB	70.17	14.74	0.21	0	39.15	80.59	0	0	59.74	maeB	NaN	NaN	NaN	0	20.89	24.84	0	0	18.35
b0360	88.34	16.27	0.18	100.35	97.37	65.59	101.74	0	76.66	b0360	61.05	12.47	0.2	46.23	65.49	51.53	50.5	0	76.69
tdcB	NaN	NaN	NaN	27.67	35.2	34.13	21.79	0	40.74	tdcB	NaN	NaN	NaN	25.27	26.22	24.9	7.03	0	9.65
rhsB	54.27	1.46	0.03	27.58	53.24	5.92	41.42	0	55.3	rhsB	NaN	NaN	NaN	15.22	0	20.45	1.02	0	13.77
yqjG	55.7	0	0	49.67	55.7	41.44	37.47	0	41.78	yqjG	NaN	NaN	NaN	11.54	21.29	26.39	14.83	0	27.54
idnK	54.44	0	0	54.44	0.81	1.5	0.66	0	2.92	idnK	67.91	0	0	39.82	67.91	39.03	12.73	0	31.92
yneI	68.26	17.35	0.25	80.52	49.41	20.87	55.99	0	47.78	yneI	53.44	0	0	10.88	12.15	53.44	13.14	0	39.96
setB	NaN	NaN	NaN	0.06	0.3	42.51	0	0	18.11	setB	NaN	NaN	NaN	8.69	0	20.01	1	0	6.44
frdA	63.17	9.43	0.15	40.13	40.62	74	58.72	0	56.78	frdA	51.81	0	0	47.8	45.48	51.81	46.56	0	44.64
gltA	NaN	NaN	NaN	5.99	45.96	0	0	0	39.56	gltA	NaN	NaN	NaN	10.82	0	11.74	0	0	13.71
atpI	214.52	67.87	0.32	246.97	174.59	225.52	124.3	0	301.24	atpI	63.46	8.76	0.14	43.4	57.27	37.04	16.56	0	69.66
yiaW	67.73	8.87	0.13	0.37	47.44	60.69	77.69	0	64.83	yiaW	NaN	NaN	NaN	5.26	5.11	23.06	14.82	0	10.72
yhaH	70.57	16.97	0.24	60.93	54.29	21.55	74.33	0	92.74	yhaH	NaN	NaN	NaN	4.28	1.04	29.56	22.16	0	46.96
somA	352.53	205.08	0.58	629.39	439.56	165.24	135.14	0	393.32	somA	112.04	21.04	0.19	83.19	113.87	133.53	11.74	0	117.58
ydiP	NaN	NaN	NaN	0	33.42	0.52	37.6	0	29.97	ydiP	NaN	NaN	NaN	0	20.87	23.45	16.45	0	40.94
crp	289.97	40.23	0.14	366.65	262.88	288.26	261.45	264.91	295.64	crp	118.66	59.13	0.5	93.08	100.17	154.03	71.53	70.9	222.27
ydiY	78.82	16.09	0.2	98.23	81.87	89.19	63.68	0	61.12	ydiY	NaN	NaN	NaN	25.7	39.24	28.72	17.02	0	24.12
pgi	236.97	68.8	0.29	353.89	270.23	183.71	241.06	208.17	164.78	pgi	195.32	67.43	0.35	215.07	233.34	141.51	175.9	109.5	296.61
adiA	NaN	NaN	NaN	2.12	9.14	36.23	39.41	0	47.96	adiA	NaN	NaN	NaN	18.08	1.62	23.35	16.78	0	9.68
yidE	NaN	NaN	NaN	0	0.84	0	0	0	0	yidE	NaN	NaN	NaN	0	0.97	13.14	0	0	0
fixC	NaN	NaN	NaN	0	0	1.53	0	0	0	fixC	NaN	NaN	NaN	0	0	12.71	0.64	0	0
ycbZ	139.42	24.29	0.17	166.7	112.9	45.19	126.35	0	151.75	ycbZ	75.46	0	0	22.35	35.69	37.72	17.19	0	75.46
yeaM	83.77	0	0	83.77	0	0	0.21	0	22.14	yeaM	NaN	NaN	NaN	26.74	34.68	0.17	0.93	0	39.91
pdhR	NaN	NaN	NaN	3	0.02	25.13	20.27	0	35.95	pdhR	NaN	NaN	NaN	0	0.48	14.46	5.8	0	7.05
uvrA	86.5	18	0.21	100.87	73.35	110.31	69.72	0	78.24	uvrA	70.55	10.49	0.15	86.09	66.09	63.09	42.95	0	66.93
caiC	NaN	NaN	NaN	0.98	0	0	30.89	0	41.59	caiC	NaN	NaN	NaN	21.28	0	15.01	9.43	0	3.02
cadA	NaN	NaN	NaN	0	25.58	0	43.73	0	32.49	cadA	NaN	NaN	NaN	12.62	10.39	9.89	9.26	0	0.96
yihR	50.04	0	0	11.97	32.08	0	0	0	50.04	yihR	NaN	NaN	NaN	20.29	21.26	17.05	1.24	0	12.97
sdaA	120.05	104.43	0.87	111.5	75.63	50.47	60.44	0	302.2	sdaA	NaN	NaN	NaN	24.74	20.32	30.09	11.72	0	49.9
eutB	NaN	NaN	NaN	19.24	31.5	29.76	31.07	0	44.37	eutB	NaN	NaN	NaN	16.25	8.51	33.69	4.74	0	12.72
yeaT	88.28	36.64	0.42	114.19	42.49	26.93	15.8	0	62.37	yeaT	61.53	0	0	30.39	42.33	22.18	31.21	0	61.53
pykF	195.99	80.77	0.41	334.64	127.19	178.83	154.57	0	184.69	pykF	132.06	14.47	0.11	128.11	128.25	114.73	134.82	0	154.4
fruB	238.31	119.17	0.5	254.46	92.53	330.29	142.84	0	371.41	fruB	161.27	0	0	16.86	48.82	38.6	1.01	0	161.27
lacZ	NaN	NaN	NaN	0	0	0	0	0	0	lacZ	NaN	NaN	NaN	0	0	0	0	0	0
emrR	109.32	27.91	0.26	133.84	82.78	136.22	77.17	0	116.57	emrR	NaN	NaN	NaN	48.67	14.54	42.43	24.03	0	47.48
glpX	103.09	29	0.28	125.61	86.05	0	71.1	0	129.59	glpX	51.12	0	0	38.5	47.46	31.87	38.78	0	51.12
exuR	164.89	33.55	0.2	218.49	164.79	126.53	152.66	0	162.01	exuR	92.92	20.43	0.22	83.01	91.93	75.57	86.2	0	127.9
cysJ	238.42	89.06	0.37	306.53	209.65	11.78	125.07	0	312.45	cysJ	74.86	0	0	28.15	40.24	40.36	13.07	0	74.86
yedW	222.8	112.06	0.5	433.08	246.91	138.52	157.13	141.8	219.39	yedW	159.56	38.6	0.24	200.59	189.03	142.42	117.21	116.99	191.13
sdhC	174.68	89.38	0.51	142.42	152.94	326.76	90.26	0	160.99	sdhC	52.64	0	0	16.45	52.64	23.69	0	0	26.99
yhfA	85.61	24.99	0.29	63.13	69.15	118.08	40.67	0	92.09	yhfA	68.49	10.82	0.16	47.07	75.59	56.04	26.18	0	73.84
cyoA	624.22	161.5	0.26	719.51	615.05	318.67	623.86	691	777.25	cyoA	102.34	57.65	0.56	68.19	96.95	88.54	60.33	83.23	216.8
idnR	NaN	NaN	NaN	14.54	0	0	0.05	0	9.56	idnR	NaN	NaN	NaN	16.74	28.37	11.55	0.64	0	11.67
yijF	NaN	NaN	NaN	16.33	0.26	39.53	14.62	0	40.93	yijF	NaN	NaN	NaN	14.02	0.01	15.37	0	0	12.77
tnaC	167.77	86.23	0.51	303.11	113.33	161.71	77.3	0	183.39	tnaC	114.01	39.1	0.34	27.46	141.66	34.29	6.75	0	86.36
ygjH	60.23	0	0	60.23	0	0	0	0	2.93	ygjH	NaN	NaN	NaN	47.74	43.96	20.34	0	0	20.64
yaaJ	55.54	0	0	49.42	47.97	34.39	34.77	0	55.54	yaaJ	NaN	NaN	NaN	14.41	13.19	5.65	0	0	23.12
mngR	77.02	15.52	0.2	83.99	42.29	95.47	62.01	0	66.6	mngR	NaN	NaN	NaN	35.6	20.61	39.45	25.83	0	37.87
msrB	366.08	115.81	0.32	375.26	334.89	553.63	240.22	0	326.42	msrB	81.42	26.24	0.32	55.02	92.13	65.49	30.12	0	113.04
U139	NaN	NaN	NaN	0	0	0	0	0	0	U139	NaN	NaN	NaN	0	0	0	0	0	0
hdeB	NaN	NaN	NaN	0	0	0	0	0	1.94	hdeB	NaN	NaN	NaN	26.77	35.94	21.57	0	0	2.08
yijO	NaN	NaN	NaN	3	0	0.03	0	0	26.71	yijO	NaN	NaN	NaN	0.08	0.89	11.89	0.97	0	9.74
wrbA	NaN	NaN	NaN	0	0	0	0	0	0	wrbA	NaN	NaN	NaN	0	0	0	0	0	0
b4283	NaN	NaN	NaN	21.48	20	46.1	8.45	0	27.76	b4283	NaN	NaN	NaN	25.28	28.34	19.68	0.93	0	16.55
acnB	496.36	117.87	0.24	636.1	520.31	428.11	334.05	0	563.22	acnB	130.75	53.54	0.41	86.48	130	120.64	95.54	0	221.11
tktA	255.78	58.92	0.23	315.02	270.05	181.37	208.08	0	304.39	tktA	79.68	15.27	0.19	75.72	84.14	61.21	40.56	0	97.65
yacH	NaN	NaN	NaN	3	24.76	46.96	18.13	0	47.84	yacH	NaN	NaN	NaN	23.77	17.9	9.62	0	0	11.38
tdcG_2	NaN	NaN	NaN	3	0	0	0	0	6.96	tdcG_2	NaN	NaN	NaN	0	11.97	8.34	0	0	5.56
gadW	1032.17	450.54	0.44	1868.58	1042.54	609.56	1039.67	963.68	668.97	gadW	980.5	125.22	0.13	932.74	959.04	881.11	926.51	953.82	1229.8
pagB	63.01	1.52	0.02	0	30.9	61.94	4.64	0	64.09	pagB	NaN	NaN	NaN	0	22.14	27.84	8.36	0	27.16
intB	57.69	7.31	0.13	50.67	52.74	68.87	55.38	0	60.8	intB	61.54	14.14	0.23	37.84	41.87	51.55	33.12	0	71.54
yqjC	NaN	NaN	NaN	38.24	43.6	0	46.41	0	41.87	yqjC	NaN	NaN	NaN	47.39	41.03	25.42	30.13	0	24.36
fumB	NaN	NaN	NaN	0.94	0	0	0	0	0.65	fumB	NaN	NaN	NaN	0	0.18	0	0.96	0	0.73
Empty	595.85	0	0	595.85	0	0	0	0	0	Empty	75.72	0	0	75.72	0	0	0	0	0
dps	490.05	120.07	0.25	689.82	381.06	500.53	457.4	421.45	0	dps	798.42	366.27	0.46	1497.1	888.87	593.61	708.86	518.87	583.19
cysH	NaN	NaN	NaN	0.07	0.8	0	0	0	0	cysH	NaN	NaN	NaN	0	0	0	0	0	0.46
yhjG	NaN	NaN	NaN	0	0.52	0.02	0	0	0	yhjG	NaN	NaN	NaN	17.54	45.98	1.14	0.97	0	11.54
hfq	105.84	39.85	0.38	71.19	29.99	96.95	0	0	149.39	hfq	74.45	25.78	0.35	63.92	103.56	52.84	51.17	0	100.76
macA	NaN	NaN	NaN	0	0.4	0	0.26	0	0	macA	NaN	NaN	NaN	0	0.51	0	0	0	0
ycjK	108.02	27.14	0.25	84.04	120.77	87.08	140.17	0	42.48	ycjK	71.89	24.47	0.34	52.67	102.31	51.48	81.11	0	39.15
ykfG	NaN	NaN	NaN	9.77	18.16	0.5	15.1	0	49	ykfG	NaN	NaN	NaN	15.1	9.51	0	0	0	11.38
ycjL	138.8	68.93	0.5	247.09	116.74	152.72	60.61	116.81	0	ycjL	105.51	50.61	0.48	62.26	128.14	92.78	192.99	102.37	54.5
poxB	57.34	0	0	0	34.21	37.41	57.34	35.06	3.95	poxB	59.8	7.86	0.13	0	27.29	52.21	67.91	59.27	36.95
yhbW	51.21	0	0	14.24	0	35.59	51.21	0	19.43	yhbW	70.74	0	0	21.76	0	44.18	47.99	70.74	16
ybcW	105.09	19.44	0.18	97	94.73	96.38	144.64	99.41	98.4	ybcW	92.56	26.47	0.29	58.64	35.66	72.37	99.86	109.03	122.9
gatR_1	59.92	0	0	0	0	59.92	38.04	40.31	37.17	gatR_1	64.73	13	0.2	0	0	43.05	55.54	73.93	30.84
torT	NaN	NaN	NaN	29.1	0	29.05	9.46	24.69	21.82	torT	72.14	0	0	29.28	0	26.8	34.91	72.14	24.14
yjdI	55.62	3.08	0.06	34.13	38.06	56.12	58.41	52.32	15.47	yjdI	89.37	19.13	0.21	38.94	35.16	80.28	85.59	117.23	74.36
lacZ	NaN	NaN	NaN	0	0	0	0	0	0	lacZ	NaN	NaN	NaN	0	0	0	0	0	0
ycjX	81.45	0	0	81.45	22.93	7.1	0	39.59	36.02	ycjX	65.68	9.1	0.14	77.47	15.8	61.17	0	67.64	56.46
uidA	NaN	NaN	NaN	0	13.42	11.1	33.12	28.24	0	uidA	NaN	NaN	NaN	0	6.62	36.2	34.47	44.03	0
yjjU	NaN	NaN	NaN	0	0	35.68	39.81	30.55	0	yjjU	60.36	10.4	0.17	0	0	28.37	67.72	53.01	0
galU	142.27	46.4	0.33	197.63	140.68	69.86	186.69	137.99	120.76	galU	82.41	24.54	0.3	45.19	38.76	36.41	99.76	65.06	38.5
hcaR	76.92	15.26	0.2	0	44.48	94.34	70.49	42.85	65.92	hcaR	61.74	5.34	0.09	0	63.83	37.76	55.03	67.63	60.47
fdnG	NaN	NaN	NaN	0	0	13.47	47.72	22.94	0	fdnG	NaN	NaN	NaN	0	0	13.76	37.95	45.57	0
dmsA	576.29	188.25	0.33	831.34	521.32	508.5	764.23	510.84	321.5	dmsA	600.53	92.46	0.15	537.71	629.18	500.91	750.4	540.24	644.75
yjfQ	98.46	39.83	0.4	161.06	74.43	58	106.73	66.04	124.5	yjfQ	71.65	4.56	0.06	22.47	37.18	69.95	69.35	68.85	78.46
yncE	138.58	48.39	0.35	146.71	159.6	114.92	202.79	148.94	58.53	yncE	188.77	39.33	0.21	210.95	33.77	199.66	185.28	224.6	123.35
gatY	365.57	176.03	0.48	689.14	220.84	305.68	438.01	237.14	302.61	gatY	341.52	317.03	0.93	176.32	340.24	222.04	156.7	179.43	974.41
serA	NaN	NaN	NaN	0	0	0	0	0	0	serA	NaN	NaN	NaN	0	0	0	0	0	0
gutM	NaN	NaN	NaN	0	0	12.27	37.88	0	0	gutM	NaN	NaN	NaN	0	0	15.88	42.83	30.17	0
yciK	59.5	7.07	0.12	0	0	58.42	69.81	54.87	54.9	yciK	56.27	8.53	0.15	0	0	51.76	50.94	66.1	33.48
U66	NaN	NaN	NaN	0	0	0	0	0	0	U66	NaN	NaN	NaN	0	0	0	0	0	0
cbdA	59.98	0	0	19	42.09	26.55	59.98	43.85	17.19	cbdA	53.13	0	0	37.92	46.53	22.26	37.55	53.13	43.09
ytfE	NaN	NaN	NaN	0	0	29.47	39.04	29.13	18.1	ytfE	53.52	0	0	0	0	47.84	39.32	53.52	24.28
yneJ	93.11	22.27	0.24	125.92	82.93	75.34	0	106.1	75.26	yneJ	76.03	1.23	0.02	43.1	25.8	75.16	0	76.9	41.9
galS	NaN	NaN	NaN	26.1	0	49.37	33.49	37.78	32.26	galS	52.65	3.22	0.06	23.13	0	21.77	54.93	50.37	17.47
yhfK	56.8	5.33	0.09	0	0	59.75	59.99	50.64	27.1	yhfK	65.56	24.33	0.37	0	0	51.73	51.3	93.66	24.84
srlR	59.13	4.71	0.08	62.46	45.67	48.8	55.8	14.92	47.31	srlR	66.55	5.76	0.09	39.62	22.32	62.47	44.78	70.62	33.49
yfdZ	115.81	32.7	0.28	165.19	102.47	102.08	145.03	103.5	76.61	yfdZ	85.54	33.29	0.39	52.17	54.06	61.66	110.88	106.89	127.58
ylcE	66.06	10	0.15	0	0	47.03	73.13	58.99	35.79	ylcE	64.67	4.51	0.07	0	0	33.89	61.48	67.86	20.96
ndh	186.04	71.98	0.39	224.87	180.37	64.77	162.91	203.37	279.96	ndh	79.23	17.67	0.22	81.07	67.27	94.37	99.83	81.17	51.7
ytfF	103.11	25.32	0.25	141.78	85.98	101.92	109.76	76.1	35.02	ytfF	71.62	13.25	0.18	58.18	61.91	69.01	81.97	92.92	65.74
ydiQ	NaN	NaN	NaN	0	0	4.71	0	42.95	0	ydiQ	NaN	NaN	NaN	0	0	30.88	27.14	48.27	0
yjcH	NaN	NaN	NaN	0	0	0	0.69	28.42	0	yjcH	NaN	NaN	NaN	0	0	0	14	12.2	0
yhfL	NaN	NaN	NaN	0	0	37.63	21.36	2.52	0	yhfL	50.6	0	0	0	0	28.12	50.6	48.9	0
fucR	75.19	24.85	0.33	51.66	64.12	60.41	86.57	37.99	113.22	fucR	71.88	10.86	0.15	28.88	27.05	33.54	68.62	63.02	84
sohB	265.85	79.94	0.3	385.85	278.87	144.88	238.07	243.26	304.17	sohB	133.58	42.79	0.32	80.67	116.46	121.38	129.11	144.25	209.6
ackA	111.33	83.11	0.75	23.71	65.59	28.87	63.69	80.58	235.48	ackA	78.21	0	0	18.4	12.47	45.78	43.2	78.21	25.53
aldH	NaN	NaN	NaN	0	0	0	0	0	0	aldH	NaN	NaN	NaN	0	0	0	6.71	0	0
ytfL	94.76	18.3	0.19	86.33	85.52	103.42	126.25	93.54	73.54	ytfL	124.85	26.49	0.21	111.48	84.5	121.77	158.75	124.44	148.17
yeaU	NaN	NaN	NaN	0	0	0	0	0	0	yeaU	NaN	NaN	NaN	0	0	0	1.2	27.48	0
yjcO	106.24	33.92	0.32	0	65.26	151.18	82.33	124.35	108.07	yjcO	95.86	12.91	0.13	0	81.67	92.22	99.21	90.16	116.06
yhfP	NaN	NaN	NaN	0	0	0	0	0	0	yhfP	NaN	NaN	NaN	0	0	0	0	11.53	0
dhaR	NaN	NaN	NaN	0	0	11.11	29.76	2.41	0	dhaR	55.83	0	0	0	0	22.11	55.83	30.62	0
yrfF	104.27	29.2	0.28	150.92	110.22	40.45	81.03	78.9	100.27	yrfF	56.85	8.06	0.14	23.06	54.43	41.63	53.68	50.61	68.69
narQ	NaN	NaN	NaN	0	0	0	0	0	0	narQ	NaN	NaN	NaN	0	0	0	0	20.68	0
aldA	NaN	NaN	NaN	39.86	0	43.52	37.39	42.37	0	aldA	NaN	NaN	NaN	14.9	0	21.51	37.71	44.81	0
yjgH	53.45	0	0	23.27	0	31.51	53.45	31.97	19.25	yjgH	NaN	NaN	NaN	10.13	0	27.95	37.34	39.72	18.95
yedX	NaN	NaN	NaN	0	0	0	23.14	17.7	0	yedX	NaN	NaN	NaN	0	0	27.71	44.01	27.84	0
mdtO	NaN	NaN	NaN	0	0	0	0	0	0	mdtO	NaN	NaN	NaN	0	0	0	15.44	0	0
yhgA	NaN	NaN	NaN	0	0	27.42	14.35	8.14	0	yhgA	NaN	NaN	NaN	0	0	16.43	24.19	36.77	0
feaB	NaN	NaN	NaN	0	0	6.63	49.88	46.99	0	feaB	NaN	NaN	NaN	0	0	14.09	35.94	27.03	0
yhhY	NaN	NaN	NaN	0	0	0	0.8	4.13	0	yhhY	NaN	NaN	NaN	0	0	0	23.68	26.29	0
ttdA	NaN	NaN	NaN	0	0	8.05	33.36	1.27	0	ttdA	NaN	NaN	NaN	0	0	20.06	26.35	36.83	0
fhlA	66.67	0	0	22.7	40.94	49.89	66.67	21.31	36.87	fhlA	66.21	2.42	0.04	26.96	18.93	63.92	68.73	65.97	36.2
yjgR	NaN	NaN	NaN	44.63	0	41.42	36.3	0	19.12	yjgR	NaN	NaN	NaN	12.03	0	36.33	31.45	47.62	7.86
ypdA	56.02	0	0	0	0	11.29	0.09	56.02	19.18	ypdA	NaN	NaN	NaN	0	0	32.76	35.95	42.6	27.07
mdtN	NaN	NaN	NaN	0	0	0	0	0	0	mdtN	NaN	NaN	NaN	0	0	0	0	0	0
yrbL	1088.62	446.73	0.41	1479.37	944.06	1001.03	397.85	1040.25	1669.18	yrbL	667.89	266.52	0.4	524.22	524.15	827.34	347.8	685.01	1098.81
galR	51.8	0	0	0	0	0	17.36	51.8	0	galR	NaN	NaN	NaN	0	0	21.8	28.6	15.39	0
yhhN	74.72	0	0	0	0	40.7	74.72	38.37	19.99	yhhN	NaN	NaN	NaN	0	0	22.6	42.67	43.48	42.51
glpD	74.14	17.98	0.24	61.42	20.94	27.4	23.42	86.86	23.54	glpD	NaN	NaN	NaN	22.37	42.75	27.03	43.96	28.23	8.76
nrfE	NaN	NaN	NaN	0	0	0	12.53	12.46	0	nrfE	NaN	NaN	NaN	0	0	0	26.05	22.39	0
yjhU	NaN	NaN	NaN	0	0	0	0	2.34	1.02	yjhU	NaN	NaN	NaN	0	0	12.58	8.06	4.75	17.61
yjiT	NaN	NaN	NaN	0	0	0	1.1	3.76	0	yjiT	NaN	NaN	NaN	0	0	0	32.96	17.2	0
phnQ	NaN	NaN	NaN	0	0	0	0	0	0	phnQ	NaN	NaN	NaN	0	0	0	0	0	0
yhcA	NaN	NaN	NaN	0	0	0	26.62	13.76	0	yhcA	NaN	NaN	NaN	0	0	0	21.18	40.57	0
bglA	NaN	NaN	NaN	0	0	0	0	1.03	0	bglA	NaN	NaN	NaN	0	0	0	0	11.86	0
yhhQ	274.02	74.91	0.27	361.21	265.59	179.55	200.54	286.27	350.93	yhhQ	93.42	28.59	0.31	70.45	80.39	129.3	56.75	118.23	105.37
fdhD	69.87	13.18	0.19	64.7	65.35	53.71	74.96	92.87	67.65	fdhD	67.19	6.73	0.1	39.39	41.27	36.69	71.95	62.43	43.87
cybC	NaN	NaN	NaN	40.07	0	21.17	0	26.91	0	cybC	NaN	NaN	NaN	21.54	0	33.06	29.16	35.2	0
mltD	803.6	273.57	0.34	940.06	687.74	434.47	588.1	1099.42	1071.84	mltD	272.62	79.6	0.29	234.07	224.54	332.29	154.9	344.87	345.06
citT	NaN	NaN	NaN	0	0	0	0	0	0	citT	NaN	NaN	NaN	0	0	0	27.18	33.56	0
yjdB	NaN	NaN	NaN	0	0	42.59	36.89	2.27	0	yjdB	NaN	NaN	NaN	0	0	38.85	34.37	43.24	0
U139	NaN	NaN	NaN	0	0	0	0	0	0	U139	NaN	NaN	NaN	0	0	0	0	0	0
glcC	65.62	17.69	0.27	0	0	53.11	38.83	78.13	0	glcC	NaN	NaN	NaN	0	0	27.77	32.96	36.83	0
norV	NaN	NaN	NaN	0	0	0	0	0	0	norV	NaN	NaN	NaN	0	0	0	0	0	0
wrbA	NaN	NaN	NaN	0	0	0	0	0	0	wrbA	NaN	NaN	NaN	0	0	0	0	0	0
yhhZ	NaN	NaN	NaN	0	0	0	0	0	0	yhhZ	NaN	NaN	NaN	0	0	0	0.7	0	0
fldA	218.35	69.38	0.32	352.01	207.53	175.01	155.4	217.44	202.72	fldA	82.39	21.12	0.26	96.35	72.58	80.71	63.73	63.51	117.5
galE	102.6	34.88	0.34	169.36	85.25	71.59	97.1	84.96	107.35	galE	66.89	12.53	0.19	54.19	59.67	62.06	72.72	44.95	85.8
aniC	NaN	NaN	NaN	0	0	0	6.42	31.2	0	aniC	NaN	NaN	NaN	0	0	0	32.2	24.46	0
yhcG	NaN	NaN	NaN	0	0	0	0	0	0	yhcG	NaN	NaN	NaN	0	0	0	0	0	0
mhpR	75.19	6.18	0.08	73.47	48.83	82.33	67.69	77.26	1.38	mhpR	71.08	11.58	0.16	46.95	39.02	70.73	82.08	76.34	55.17
ygbJ	NaN	NaN	NaN	0	0	0	1	3.57	0	ygbJ	NaN	NaN	NaN	0	0	0	11.68	16.34	0
zraS	NaN	NaN	NaN	0	0	0	11.58	9.24	0	zraS	NaN	NaN	NaN	0	0	0	27.22	41.13	0
yhiP	NaN	NaN	NaN	0	0	39.79	42.52	19.77	20.19	yhiP	NaN	NaN	NaN	0	0	21.86	25.47	47.39	9.19
pflA	NaN	NaN	NaN	0	0	0	0.94	6.59	17.76	pflA	NaN	NaN	NaN	0	0	0	0	20.93	26.96
Empty	NaN	NaN	NaN	0	0	0	0	0	0	Empty	NaN	NaN	NaN	0	0	0	0	0	0
yjdF	NaN	NaN	NaN	0	0	11.56	18.08	34.46	20.28	yjdF	NaN	NaN	NaN	0	0	29.74	18.79	29.8	23
sohA	74.04	16.82	0.23	17.83	56.39	95.64	77.71	0	66.44	sohA	68.13	15.1	0.22	60.99	61.89	55.88	67.85	0	94.06
feaR	NaN	NaN	NaN	0	0.04	0	49.85	0	0	feaR	NaN	NaN	NaN	0	34.73	0	30.44	0	0
fsaA	NaN	NaN	NaN	0	0	0	0	0	0	fsaA	NaN	NaN	NaN	0	0	0	0	0	0
nrfA	NaN	NaN	NaN	0	0	0	0	0	0	nrfA	NaN	NaN	NaN	0	0	0	1	0	0
b0582	86.37	22.67	0.26	0	68.79	67.3	91.57	81.34	122.86	b0582	60.07	7.25	0.12	0	25.24	52.47	60.81	66.92	38
narZ	NaN	NaN	NaN	0	0	39.13	26.98	36.62	30.23	narZ	NaN	NaN	NaN	0	0	12.62	27.57	29.57	14.5
nuoM	52.63	0	0	3	36.46	0	0.23	52.63	47.53	nuoM	61.36	0	0	0	37.01	0	18.41	61.36	30.02
torS	76.25	16.42	0.22	37.61	96.51	0	56.42	77.71	74.38	torS	72.59	21.13	0.29	10.85	48.01	0	30.63	87.53	57.64
ugd	52.71	1.76	0.03	0.07	54.68	0	47.2	52.19	51.28	ugd	72.13	10.57	0.15	34.09	41.12	0	64.66	79.6	44.33
b2974	NaN	NaN	NaN	26.76	33.84	0	13.75	6.72	29.21	b2974	58.89	8.6	0.15	26.59	37.26	0	52.81	64.98	27.61
ftsH	272.81	96.78	0.35	390.71	304.05	118.09	259.15	220.61	344.26	ftsH	99.7	36.09	0.36	91.32	91.05	66.5	77.75	102.8	168.8
yeeA	67.9	13.66	0.2	64.95	78.49	0	52.29	58.64	85.12	yeeA	58.79	11.19	0.19	53.07	34.46	0	51.61	71.68	37.84
pncB	428.08	100.1	0.23	491.08	394.38	256.51	405.68	537.82	482.98	pncB	249.53	38.72	0.16	282.69	263.89	188.71	233.7	233.99	294.23
lacZ	NaN	NaN	NaN	0	0	0	0	0	0	lacZ	NaN	NaN	NaN	0	0	0	0	0	0
insB_4	NaN	NaN	NaN	30.77	34.72	0	0	15.6	24.37	insB_4	54.53	0	0	21.97	32.24	0	0	54.53	20.77
torR	69.8	2.3	0.03	0	68.18	0	0.05	0	71.43	torR	55.76	0.75	0.01	0	40.95	0	19.27	55.22	56.29
rfbA	NaN	NaN	NaN	39.84	37.28	0	0.94	27.66	38.31	rfbA	65.35	20.73	0.32	50.69	39.52	0	30.97	80.01	39.23
hybO	NaN	NaN	NaN	0	49.22	0	42.1	44.75	33.4	hybO	62.92	9.92	0.16	25.64	57.4	0	49.09	74.38	57
hslV	107.2	44.26	0.41	121.4	126.91	0	60.48	63.7	163.51	hslV	100.17	38.31	0.38	145.65	112.09	54.59	52.22	111.22	125.27
yejG	801.6	273.44	0.34	1087.66	1029.8	490.06	889.87	871.43	440.76	yejG	190.73	47.81	0.25	140.83	184.88	161.8	184.92	280.37	191.62
pepD	75.91	29.79	0.39	118.54	74.14	14.75	53.32	48.08	57.66	pepD	96.17	15.4	0.16	116.95	82.76	30.05	84.43	88.59	108.08
ybhD	NaN	NaN	NaN	34.07	0	0	0	33.53	48.8	ybhD	59.15	0	0	33.13	0	0	0	59.15	44.59
hydN	NaN	NaN	NaN	0	28.02	0	0	0	20	hydN	51.69	0	0	0	16.01	0	0	51.69	26.37
adhE	273.49	135.42	0.5	519.98	167.41	133.56	281.09	267.52	271.37	adhE	265.36	178.4	0.67	295.45	196.28	159.71	188.65	139.49	612.58
serA	NaN	NaN	NaN	0	0	0	0	0	0	serA	NaN	NaN	NaN	0	0	0	0	0	0
chiA	NaN	NaN	NaN	28.69	45.2	0	8.38	26.35	38.14	chiA	65.58	0	0	24.65	25.02	0	34.55	65.58	41
mcrB	117.32	33.26	0.28	165.37	119.2	0	78.41	95.42	128.23	mcrB	80.38	20.51	0.26	45.41	58.36	0	42.13	83.83	98.95
U66	NaN	NaN	NaN	0	0	0	0	0	0	U66	NaN	NaN	NaN	0	0	0	0	0	0
xseB	236.03	110.55	0.47	322.38	262.02	170.06	130.81	131.63	399.28	xseB	143.69	55.45	0.39	131.71	125.61	117.32	80.63	164.09	242.76
ynfB	54.95	5.05	0.09	54.03	60.4	0	0	47.34	50.43	ynfB	61.19	7.65	0.13	29.05	53.35	0	0	68.65	61.56
hycB	NaN	NaN	NaN	0	8.87	0	0.35	7.64	27.11	hycB	NaN	NaN	NaN	11	19.54	0	0.83	49.42	17.77
b2192	54.99	0	0	0	26.5	0	0	0	54.99	b2192	60.99	0	0	0	33.45	0	0	60.99	33.8
rfbB	80.92	10.67	0.13	94.25	81.76	0	47.44	68.24	79.44	rfbB	73.49	16.06	0.22	50.22	82.03	0	63.74	89.04	82.44
yhfX	NaN	NaN	NaN	0.86	37.04	0	16.95	15.41	0	yhfX	50.21	0	0	18.4	18.05	0	32.19	50.21	0
yhgF	78.08	18.07	0.23	93.49	86.55	0	52.25	36.57	80.02	yhgF	72.97	17.6	0.24	47.65	39.26	0	37.93	85.41	60.53
apbE	89.37	11.09	0.12	48.38	81.69	0	49.75	84.34	102.09	apbE	79.6	0	0	28.72	19.65	0	25.98	79.6	47.54
rne	NaN	NaN	NaN	0	25.75	0	1.17	33.06	20.6	rne	52.89	0	0	14.76	23.97	0	17.26	52.89	17.96
rstA	427.9	202.21	0.47	707.24	0	218.79	250.52	433.61	529.35	rstA	151.71	62.87	0.41	163.39	0	121.4	64.32	177.32	232.1
fdhF	51.05	0	0	21.29	28.8	0	3.61	51.05	26.5	fdhF	82.04	39.97	0.49	128.18	36.5	0	39.49	59.77	58.16
yfbV	78.82	21.65	0.27	61.93	61.03	0	29.62	86.06	106.25	yfbV	76.64	17.89	0.23	27.06	57.97	0	37.88	78.32	93.62
gcvT	145.89	37.63	0.26	145.01	131.01	0	135.66	108.88	208.88	gcvT	50.82	0	0	23.93	26.42	0	32.66	50.82	36.7
yhfZ	58.84	9.04	0.15	0	39.95	0	22.75	65.23	52.45	yhfZ	68.3	0	0	19.78	34.25	0	22.89	68.3	35.5
rssB	79.44	2.49	0.03	81.2	26.13	0	77.68	0	3.14	rssB	97.78	8.38	0.09	89.65	102.93	0	96.19	90.71	109.44
ygiR	130.93	55.04	0.42	88.97	140.44	0	86.03	118.33	220.89	ygiR	82.69	9.98	0.12	40.82	31.82	0	38.05	89.75	75.64
dcp	72.89	0.16	0	73	0	0	0	0	72.77	dcp	53.15	0	0	36.98	0	0	0	0	53.15
slyB	362.79	165.32	0.46	607.23	358.93	181.67	208.61	321.19	499.09	slyB	158.9	41.68	0.26	168.99	140.18	141.86	111.22	156.98	234.19
nudE	137.97	33.34	0.24	151.24	139.04	0	107.4	106.08	186.11	nudE	78.5	18.12	0.23	57.09	73.68	0	70.54	86.02	105.19
aegA	70.46	0	0	0	18.05	0	0	70.46	42.25	aegA	54.12	0	0	0	33.4	0	0	54.12	28.95
kbl	120.89	40.48	0.33	177.53	135.41	0	68.46	101.25	121.82	kbl	66.49	0	0	33.64	47.03	0	29.02	44.87	66.49
yzgL	NaN	NaN	NaN	43.25	14.45	0	0.4	34.88	31.92	yzgL	50.21	0	0	19.89	34.22	0	0	50.21	13.87
rnt	147.01	48.16	0.33	191.89	146.61	0	73.43	134.84	188.28	rnt	88.01	15.49	0.18	77.16	74.98	0	29.36	108.53	91.36
ynjF	NaN	NaN	NaN	0	26.61	0	0.18	11.57	40.24	ynjF	NaN	NaN	NaN	12.37	23.53	0	18.24	42.27	23.08
guaB	252.45	59.77	0.24	344.98	280.04	166.19	224.46	237.39	261.64	guaB	95.69	31.02	0.32	121	86.37	65.47	48.93	135.27	70.36
ydhO	169.01	44.79	0.27	240.61	148.42	0	133.38	138.01	184.61	ydhO	76.03	11.96	0.16	62.05	72.32	0	32.2	90.51	79.26
yhhM	170.79	43.08	0.25	200.7	180.54	95.61	148.55	215.08	184.28	yhhM	112.03	21.37	0.19	105	104.67	81.25	108.24	133.42	139.6
ygiP	NaN	NaN	NaN	0	0	0	0	0	36.38	ygiP	NaN	NaN	NaN	0	0	0	0	48.9	22.8
glmU	301.22	33.11	0.11	295.89	274.99	0	274.46	355.4	305.35	glmU	89.92	23.94	0.27	75.68	89.78	0	61.35	98.12	124.67
yhhW	NaN	NaN	NaN	0	43.82	0	0	48.99	17.82	yhhW	70.82	0	0	24.21	30.97	0	0	70.82	29.57
amyA	120.52	50.76	0.42	168.65	125.43	36.5	67.49	32.33	47.38	amyA	145.11	31.27	0.22	172.6	141.07	85.84	162.56	146.22	162.37
b1788	NaN	NaN	NaN	3	18.85	0	0	15.28	30.58	b1788	NaN	NaN	NaN	28.04	34.13	0	0	47.31	29.7
prlC	62.7	15.29	0.24	48.61	51.89	0	27.83	39.42	73.51	prlC	64.47	9.55	0.15	43.13	52.38	0	66.83	75.43	63.23
osmC	128.11	44.29	0.35	188.37	93.56	142.4	128.45	152.49	63.42	osmC	266.82	90.13	0.34	444.98	206.23	240.51	210.42	268.34	230.43
sirA	106.28	30.38	0.29	139.52	112.46	0	72	77.61	129.8	sirA	67.31	14.54	0.22	54.05	49.33	0	29.09	82.85	65.02
glpE	73.9	12	0.16	86.37	62.43	0	0	49.79	72.89	glpE	63.32	9.24	0.15	5.16	53.03	0	0	66.02	70.91
fpr	92.1	8.17	0.09	82.21	88.88	0	45.39	96.87	100.45	fpr	75.78	4.77	0.06	41.6	31.97	0	40.33	79.15	72.4
rna	NaN	NaN	NaN	15.33	38.21	0	0.97	40.32	43.44	rna	51.46	0	0	30.57	33.26	0	0	51.46	44.24
degQ	NaN	NaN	NaN	31.79	18.04	0	0	4.51	31.71	degQ	56	0	0	35.89	37.55	0	12.7	56	39.4
yoaF	64.4	0	0	33.41	12.56	0	0.01	64.4	45.2	yoaF	51.9	0	0	31.95	30.25	0	1	48.8	51.9
bax	307.88	80.87	0.26	451.22	306.7	225.44	292.87	240.08	330.97	bax	201.64	29.81	0.15	186.54	207.36	159.69	191.51	217.68	247.06
flk	156.68	47.23	0.3	214.16	147.73	0	0	99.79	165.05	flk	74.76	17.3	0.23	54.4	70.79	0	0	77.66	96.18
norR	50.15	0	0	1.24	46.78	0	0.52	45.99	50.15	norR	55.6	0	0	31.87	42.8	0	11.66	55.6	45.16
fdoG	371.2	125.96	0.34	548.54	417.01	185.88	285.64	356.48	433.63	fdoG	170.78	70.67	0.41	69.33	146.15	154.39	155.6	225.67	273.55
yhiD	198.98	35.05	0.18	167.72	179.73	223.2	168.97	256.47	197.78	yhiD	176.74	42.03	0.24	150.05	159.34	124.4	176.86	210.11	239.69
recE	56.12	6.97	0.12	24.23	53.96	0	50.49	43.26	63.91	recE	73.11	0	0	17.38	25.37	0	29.98	73.11	36.91
pinE	NaN	NaN	NaN	20.75	26.45	0	0.62	0	38.02	pinE	51.29	0	0	20.59	20.22	0	0	51.29	18.09
yoaA	61.03	13.77	0.23	47.79	44.87	0	21.5	51.3	70.76	yoaA	NaN	NaN	NaN	20.91	37.41	0	16.3	46.16	42.17
rph	122.11	16.35	0.13	111.18	106.09	0	42.5	141.17	130	rph	65.29	0	0	44.33	47.62	0	19.1	65.29	49.36
tolC	188.18	74.17	0.39	0	177.08	116.32	145.5	191.83	310.17	tolC	113.22	34.43	0.3	0	87.49	95.65	89.31	125.16	168.5
ygbI	58.24	1.7	0.03	18.83	57.85	0	2.3	56.77	60.11	ygbI	60.87	13.69	0.22	30.82	46.19	0	51.67	76.6	54.33
zraP	NaN	NaN	NaN	3	28.44	0	26.61	37.98	47.22	zraP	64.53	0	0	3	33.28	0	20.86	64.53	38.26
U139	NaN	NaN	NaN	0	0	0	0	0	0	U139	NaN	NaN	NaN	0	0	0	0	0	0
rnd	132.61	36.07	0.27	161.95	166.13	0	76.75	122.98	135.23	rnd	67.07	16.8	0.25	37.07	48.84	0	40.78	78.95	55.19
htrA	NaN	NaN	NaN	0.24	10.87	0	0	0	19.04	htrA	NaN	NaN	NaN	18.06	33.18	0	0	0	36.42
wrbA	NaN	NaN	NaN	0	0	0	0	0	0	wrbA	NaN	NaN	NaN	0	0	0	0	0	0
fadB	NaN	NaN	NaN	0	17.69	0	0.67	14.77	24.86	fadB	53.51	0	0	14.39	26.72	0	6.63	53.51	24.7
yhhF	77.92	13.85	0.18	93.05	65.86	0	46.48	32.41	74.86	yhhF	70.4	4.8	0.07	74.46	63.44	0	22.14	72.14	71.54
ssuE	NaN	NaN	NaN	0	0.99	0	0	19.81	0	ssuE	52.58	0	0	0	22.36	0	0	52.58	0
dcuS	91.7	37.97	0.41	0	85.63	0	50.06	88.94	142.16	dcuS	71.99	21.57	0.3	0	55.08	0	55.51	76.82	100.54
fhuF	265.53	46.13	0.17	241.48	267.52	45.53	343.54	249.38	225.74	fhuF	259.69	86.39	0.33	369.93	136.84	238.28	313.88	306.48	192.72
ptrB	NaN	NaN	NaN	42.95	29.16	0	0	26	37.19	ptrB	61.01	0	0	19.66	32.26	0	0	61.01	29.01
yedQ	82.17	13.66	0.17	97.74	72.23	0	0.58	33.85	76.54	yedQ	63.9	8.79	0.14	51.16	60.63	0	63.55	73.05	71.11
yebR	385.69	94.48	0.24	555.81	365.42	282.7	420.37	353.67	336.18	yebR	200.44	42.62	0.21	195.87	200.89	133.08	195.56	210.48	266.77
pepE	83.19	22.28	0.27	50.68	81.64	0	75.57	103.81	104.25	pepE	80	19.55	0.24	47.02	70.06	0	57.29	96.37	96.27
uspA	150.65	56.51	0.38	252.91	146.19	90.55	116.92	129.56	167.77	uspA	111.75	26.81	0.24	135.28	106.15	67.78	45.8	121.8	127.77
Empty	NaN	NaN	NaN	0	0	0	0	0	0	Empty	NaN	NaN	NaN	0	0	0	0	0	0
deoR	133.01	49.44	0.37	166.13	136.52	0	56.92	120.34	185.13	deoR	82.3	28.36	0.34	34.03	73.3	0	54.21	80.16	121.52
pppA	NaN	NaN	NaN	4.18	22.2	0	0	0	28.61	pppA	NaN	NaN	NaN	14.44	29.13	0	0	0	18.97
clpB	190.28	90.85	0.48	328.91	203.42	121.84	178.57	69.35	239.57	clpB	233.62	71.12	0.3	316.83	232.86	141.44	230.97	169.85	309.76
erfK	NaN	NaN	NaN	41.27	15.35	0	0	35.01	27.88	erfK	66.57	0	0	43.16	44.36	0	21.43	66.57	45.54
yohL	88.32	21.35	0.24	117.19	86.26	0	44.41	65.69	84.14	yohL	65.54	10.21	0.16	47.49	57.66	0	38.17	61.88	77.08
hsdR	72.24	5.02	0.07	9.34	79.43	0	71.02	67.74	70.77	hsdR	62.77	11.14	0.18	26.44	55.64	0	33.71	75.61	57.07
ecfI	79.01	10.96	0.14	64.6	76.82	0	0	89.54	85.09	ecfI	77.5	11.72	0.15	41.49	68	0	0	90.6	73.91
yhiI	139.99	58.68	0.42	183.43	186.95	91.58	203.22	112.43	62.37	yhiI	89.45	31.57	0.35	122.79	57.36	46.43	109.42	47.98	68.21
yifM_2	106.01	35.58	0.34	120.75	65.43	0	131.85	0	0	yifM_2	87.38	28.69	0.33	114.35	57.23	0	90.55	0	0
spr	897.06	172.03	0.19	1215.88	907.61	917.28	737.8	767.72	836.09	spr	275.84	95.12	0.34	457.15	211.47	242.91	292.74	195.68	255.12
yfjP	98.16	26.32	0.27	115.97	67.92	0	110.57	0	0	yfjP	93.69	0	0	39.32	31.81	0	93.69	0	0
purM	500.98	177.38	0.35	459.11	591.05	384.95	419.55	334.55	816.68	purM	89.29	25.38	0.28	117.27	57.7	66.71	97.72	79.42	116.9
folB	127.84	71.84	0.56	178.64	29.53	10.29	77.04	0	0	folB	71.63	8.98	0.13	65.28	19.67	19.13	77.98	0	0
sspA	248.65	50.59	0.2	345.92	240.02	215.92	242.55	202.41	245.08	sspA	107.78	33.92	0.31	160.05	92.28	73.92	130.21	74.98	115.27
lacZ	NaN	NaN	NaN	0	0	0	0	0	0	lacZ	NaN	NaN	NaN	0	0	0	0	0	0
yhiJ	78.86	23.28	0.3	0	62.4	43.72	95.32	0	0	yhiJ	81.95	0	0	34.55	34.34	21.57	81.95	0	0
metF	69.51	19.2	0.28	23.92	83.39	50.45	88.49	55.73	0	metF	116.85	72.23	0.62	59.78	51.42	162.13	120.08	236.76	70.92
yfbJ	68.2	22.7	0.33	2.58	52.15	2.44	84.26	0	0	yfbJ	78.82	0	0	30.61	31.17	11.37	78.82	0	0
yfjR	61	0	0	0	32.49	0	61	1	0	yfjR	61.04	0	0	0	19.01	16.02	61.04	22.67	0
ygiH	103.67	40.03	0.39	60.97	113.22	89.37	176.93	100.52	80.99	ygiH	71.5	28.87	0.4	62.92	42.21	33.15	114.14	58.19	50.75
ysgA	114.61	24.05	0.21	108.26	105.73	9.59	149.61	94.83	1.23	ysgA	129.46	28.49	0.22	138.02	129	125.61	179.08	97.13	107.94
arpA	82.76	0	0	3.56	14.31	0	82.76	0	0	arpA	75.9	0	0	15.82	17.5	0	75.9	0	0
fabZ	119.02	22.45	0.19	106.06	123.49	27.87	148.65	0	97.89	fabZ	95.81	0	0	39.48	41.39	27.69	95.81	0	35.37
yeaX	51.2	0	0	0	0	0	51.2	0	0	yeaX	59.27	0	0	0	21.35	0	59.27	0	0
deoA	NaN	NaN	NaN	13.51	0	0	0	0	0	deoA	NaN	NaN	NaN	20.28	0	0	0	0	0
serA	NaN	NaN	NaN	0	0	0	0	0	0	serA	NaN	NaN	NaN	0	0	0	0	0	0
yqaC	80.78	25.84	0.32	0	62.51	42.23	99.05	0	0	yqaC	69.97	0	0	0	38.75	32.22	69.97	0	0
udp	87.82	26.84	0.31	87.97	78.68	88.97	128.93	0	54.55	udp	69.45	8.11	0.12	40.91	62.17	67.97	78.2	0	48.33
U66	NaN	NaN	NaN	0	0	0	0	0	0	U66	NaN	NaN	NaN	0	0	0	0	0	0
yjhI	83.82	0	0	26.33	0	23.94	83.82	0	0	yjhI	73.52	0	0	16.3	0	24.37	73.52	0	0
crl	847.11	317.7	0.38	931.6	1052.88	468.11	830.73	1290.65	508.68	crl	145.3	26.92	0.19	121.32	128.28	140.27	183.77	173.81	124.32
yebU	87.39	28.43	0.33	0	60.35	84.79	117.03	0	0	yebU	70.05	0	0	0	22.66	25.43	70.05	0	0
deoB	124.69	36.28	0.29	95.39	121.73	186.73	140.31	119.22	84.78	deoB	62.34	12.81	0.21	52.35	32.36	40.05	77.75	51.25	68.01
elaD	82.01	0	0	0	37.48	0	82.01	0	0	elaD	62.52	0	0	0	24.38	0	62.52	0	0
ygdQ	101.1	19.71	0.19	0	87.17	0	115.04	0	0	ygdQ	77.95	0	0	0	41.83	0	77.95	0	0
fxsA	69.24	20.8	0.3	62.57	52.6	6.3	92.56	15.81	0	fxsA	76.12	0	0	42.83	48.33	29.37	76.12	31.77	0
aspA	130.31	81.97	0.63	249.25	77.93	74.08	119.97	0	0	aspA	84.01	0	0	11.51	42.91	20.5	84.01	0	0
sgcC	68.04	0	0	0	24.87	11.86	68.04	0	0	sgcC	70.14	0	0	0	24.3	10.55	70.14	0	0
yibL	81.96	18.1	0.22	61.19	94.39	39.58	90.3	0	0	yibL	73.48	0	0	22.23	41.65	33.77	73.48	0	0
b1966	55.15	0	0	0.04	0.79	0	55.15	0	0	b1966	88.97	0	0	28.56	35.43	0	88.97	0	0
deoD	84.11	0	0	0.03	39.04	41.85	84.11	0	0	deoD	71.45	0	0	15.37	30.83	7.38	71.45	0	0
yfbR	76.13	22.55	0.3	0	60.18	0	92.07	0	0	yfbR	77.02	0	0	0	44.2	20.38	77.02	0	0
yqeI	82.76	0	0	0	41.15	15.81	82.76	0	0	yqeI	65.97	0	0	0	41.05	31.84	65.97	0	0
cysQ	99.04	31.92	0.32	48.21	76.47	48.56	121.61	41.13	13.28	cysQ	87.28	0	0	29.77	45.69	31.41	87.28	33.02	37.82
cpdB	88.45	0	0	20.93	25.3	0	88.45	0	0	cpdB	72.95	0	0	15.04	21.53	0	72.95	0	0
yjhS	75.14	0	0	20.59	0	0	75.14	0	0	yjhS	69.25	0	0	31.49	0	0	69.25	0	0
yicH	79.23	0	0	27.37	35.93	31.12	79.23	0	0	yicH	62.48	0	0	28.18	26.2	30.46	62.48	0	0
yedY	84.46	0	0	1.89	44.63	14.45	84.46	0	0	yedY	88.65	0	0	36.2	26.05	27.59	88.65	0	0
yodB	70.27	20.94	0.3	0.66	56.7	59.74	94.38	0	0	yodB	66.38	0	0	36.87	42.41	33.6	66.38	0	0
yfcC	63.21	0	0	0	26.05	0	63.21	0	0	yfcC	69.87	0	0	0	23.69	0	69.87	0	0
ygeH	58.39	0	0	0	26.12	0	58.39	0	0	ygeH	65.22	0	0	0	31.43	0	65.22	0	0
deoC	131.21	35.57	0.27	178.18	109	97.25	167.17	97.56	138.1	deoC	83.95	26.03	0.31	58.32	64.33	74.01	106.79	40.3	116.3
yjiH	80.55	0	0	0	23.89	0	80.55	0	0	yjiH	69.19	0	0	0	19	0	69.19	0	0
adk	88.99	1.4	0.02	89.98	0	39.61	88	0	0	adk	88.1	0	0	23.74	0	12.64	88.1	0	0
yieE	84.97	0	0	4.77	0	21.43	84.97	0	0	yieE	78.49	0	0	27.75	27.67	17.49	78.49	0	0
apt	287.42	56.47	0.2	295.33	248.81	381.25	270.06	241.64	0	apt	102.51	18.86	0.18	92.65	87.86	99.7	129.84	35.7	0
yeeJ	69.87	0	0	3	0	0	69.87	0	0	yeeJ	71.64	0	0	5.53	0	0	71.64	0	0
intS	NaN	NaN	NaN	0	1.21	0	42.52	0	0	intS	60.36	0	0	0	25.14	0	60.36	0	0
ygeY	NaN	NaN	NaN	0	0.83	0	0	0	0	ygeY	NaN	NaN	NaN	0	21.69	0	0	0	0
metK	86.23	16.72	0.19	3	74.4	0	98.05	0	0	metK	56.07	0	0	40.31	30.64	0	56.07	0	0
yjjI	NaN	NaN	NaN	0	8.84	0	46.36	0	0	yjjI	70.16	0	0	1.64	24.33	0	70.16	0	0
flgH	52.85	0	0	0	0	0	52.85	0	0	flgH	69.06	0	0	17.79	0	10.3	69.06	0	0
yihL	62.63	0	0	35.13	20.29	0	62.63	0	0	yihL	65.34	0	0	18.29	35.34	0	65.34	0	0
add	74.09	0	0	0.05	32.76	35.82	74.09	2.26	0	add	74.24	29.03	0.39	40.37	41.84	53.71	94.77	47.95	0
yeeU	NaN	NaN	NaN	0	0	0	29.11	0	0	yeeU	NaN	NaN	NaN	8.14	0	0	46.41	0	0
b2394	104.57	27.72	0.27	0	93.8	83.85	136.06	0	0	b2394	92.52	0	0	0	40.17	37.8	92.52	0	0
ygiL	NaN	NaN	NaN	0	27.26	0	38.83	0	0	ygiL	55.22	0	0	0	35.01	0	55.22	0	0
ykgM	65.47	0	0	0	16.62	0	65.47	0	0	ykgM	79.13	0	0	0	30.67	0	79.13	0	0
yqgD	69.8	0	0	17.99	40.18	8.03	69.8	0	0	yqgD	68.66	0	0	26.2	27.63	11.04	68.66	0	0
fabF	57.87	0	0	3	14.23	0	57.87	0	0	fabF	63.46	0	0	28.06	16.29	0	63.46	0	0
yihX	89.7	37.05	0.41	20.55	63.5	36.96	115.89	0	10.36	yihX	89.03	26.67	0.3	65.96	82.9	49.36	118.23	0	45.45
amn	94.2	0	0	3	17.75	0	94.2	0	0	amn	90.03	0	0	39.96	46.99	42.55	90.03	0	0
yeiT	63.44	9	0.14	69.8	9.87	0	57.08	0	0	yeiT	61.5	0	0	4.71	28.58	0	61.5	0	0
hyfR	72.29	0	0	2.37	18.65	0	72.29	0	0	hyfR	51.21	0	0	11.03	11.99	0	51.21	0	0
eaeH	NaN	NaN	NaN	0	0	0	31.47	0	0	eaeH	65.07	0	0	0	23.26	0	65.07	0	0
ykgC	74.14	0	0	29.4	16.88	0.67	74.14	0	0	ykgC	72.18	0	0	24.64	31.15	11.41	72.18	0	0
phoP	92.21	21.55	0.23	107.49	93.5	88.02	113.65	0	58.38	phoP	75.49	21.31	0.28	66.32	61.83	63.03	112.74	0	73.55
cfa	257.81	77.43	0.3	299.15	362.64	185.5	263.32	284.74	151.53	cfa	302.69	53.6	0.18	371.35	268.49	298.19	334.82	219.19	324.11
nadK	70.11	19.86	0.28	63.55	57.23	60	99.64	0	0	nadK	78.5	0	0	22.56	39.1	17.57	78.5	0	0
cdd	67.51	5.65	0.08	73.75	60.06	67.6	68.64	0	0	cdd	70.16	27.76	0.4	44.46	50.53	49.04	89.79	0	0
yeiP	64.01	0	0	64.01	0	0	49.65	0	0	yeiP	57.38	0	0	1.27	0	0	57.38	0	0
U139	NaN	NaN	NaN	0	0	0	0	0	0	U139	NaN	NaN	NaN	0	0	0	0	0	0
ykgD	68.61	3.07	0.04	0	66.44	0	70.78	0	0	ykgD	63.26	0	0	0	46.32	0	63.26	0	0
aes	82.59	0	0	0.53	26.65	0	82.59	0	0	aes	66.24	0	0	0	29.94	0	66.24	0	0
wrbA	NaN	NaN	NaN	0	0	0	0	0	0	wrbA	NaN	NaN	NaN	0	0	0	0	0	0
ydfO	79.44	33.95	0.43	3	55.43	38.09	103.45	0	0	ydfO	81.7	0	0	25.83	28.87	25.62	81.7	0	0
guaC	210.26	61.99	0.29	159.74	293.97	138.95	228.36	0	230.28	guaC	65.19	20.8	0.32	50.49	32.91	33.63	79.9	0	21.81
rfe	74.79	0	0	31.22	40.37	0	74.79	0	0	rfe	85.58	0	0	37.94	49.43	35.92	85.58	0	0
b1331	NaN	NaN	NaN	20.51	0	0	31.86	0	0	b1331	67.69	0	0	21.13	0	0	67.69	0	0
yiiF	NaN	NaN	NaN	0	1.24	0	48.41	0	0	yiiF	64.52	0	0	0	27.52	0	64.52	0	0
gsk	240.49	76.91	0.32	356.01	228.71	152.15	199.21	0	266.39	gsk	65.91	12.23	0.19	25.17	62.57	43.44	79.46	0	55.7
ycbC	84.57	30.5	0.36	0	63	0	106.14	0	0	ycbC	78.77	0	0	0	39.7	0	78.77	0	0
guaA	71.14	0	0	3	0	0	71.14	0	0	guaA	60.8	0	0	18.17	0	0	60.8	0	0
yebF	151.38	32.04	0.21	111.12	173.4	136.23	192.7	143.45	0	yebF	93.93	36.96	0.39	84.89	85.52	97.08	152.06	50.08	0
barA	71.94	8.81	0.12	0	65.7	18.91	78.17	0	0	barA	76.92	0	0	32.01	29.19	19.79	76.92	0	0
Empty	NaN	NaN	NaN	0	0	0	0	0	0	Empty	NaN	NaN	NaN	0	0	0	0	0	0
sieB	80.14	0	0	80.14	0	0	0	0	0	sieB	NaN	NaN	NaN	0.93	0	0	0	0	0
csiE	76.33	0	0	0	76.33	0.6	44.92	0	0	csiE	84.75	23.04	0.27	0	68.46	23	101.05	0	0
smtA	177.87	18.17	0.1	0	177.87	159.71	196.04	0	0	smtA	77.21	0	0	0	48.67	14.26	77.21	0	0
upp	193.36	90.75	0.47	149.32	134.59	328.52	161.02	0	0	upp	76.33	0	0	30.9	23.21	28.89	76.33	0	0
pgk	52.68	0	0	0	0.46	0	52.68	0	0	pgk	61.16	0	0	0	20.9	0	61.16	0	0
b1998	57.02	0	0	39.35	26.83	0	57.02	0	0	b1998	57.07	0	0	10.79	23.46	0	57.07	0	0
ygjO	157.29	50.73	0.32	230.51	152.42	123.14	123.09	0	0	ygjO	50.63	0	0	11.22	33.33	11.87	50.63	0	0
coaE	119.36	50.01	0.42	217.56	115.74	86.47	115.41	84.03	96.96	coaE	76.22	17.34	0.23	104.01	64.69	91.19	60.28	67.35	69.82
nudB	76.55	19.92	0.26	105.08	67.9	59.38	73.85	0	40.57	nudB	66.63	0	0	49.68	40.31	66.63	40.62	0	26.16
yfcV	84.32	36.05	0.43	109.81	49.9	0	58.83	4.37	37.21	yfcV	52.45	2.18	0.04	53.99	32.35	50.91	38.81	18.44	16.7
sseB	78.6	16.47	0.21	102.53	71.53	65.21	75.15	21.56	37.23	sseB	55.55	0	0	55.55	42.66	39.6	41.13	39.98	22.16
ygfI	97.16	35.19	0.36	167.83	86.08	73.94	92.79	79.58	82.75	ygfI	50.64	0	0	45.12	35.67	38.94	42.34	50.64	41.06
folX	185.86	43.42	0.23	266.11	162.53	163.83	206.32	159.83	156.54	folX	107.48	12.53	0.12	127.44	92.45	109.32	114.77	98.74	102.19
gloA	71.18	33.25	0.47	120.68	50.46	0	60.17	48.66	53.39	gloA	58.07	6.31	0.11	65.36	43.24	54.22	45.51	54.63	34.88
lacZ	NaN	NaN	NaN	0	0	0	0	0	0	lacZ	NaN	NaN	NaN	0	0	0	0	0	0
rumA	84.65	36.22	0.43	154.05	88.19	80.2	62.19	53.09	70.19	rumA	65.17	5.54	0.09	69.09	43.03	43.05	39.89	61.25	49.29
cpsG	75.06	25.27	0.34	104.09	63.03	58.05	44.55	10.07	29.24	cpsG	NaN	NaN	NaN	41.78	47.04	44.23	26.7	38.5	21.59
fadI	60.5	12.01	0.2	74.37	53.74	53.4	0	2.3	25.48	fadI	51.56	0	0	46.61	43.81	51.56	0	41.06	24.15
pepB	83.32	31.64	0.38	126.72	73.34	35.05	81.83	26.45	51.41	pepB	57.88	0	0	41.76	39.88	57.88	32.24	46.45	25.95
yggE	101.48	24.78	0.24	145.11	80.69	116.54	84.75	89.59	92.18	yggE	78.51	19.86	0.25	58.16	50.54	94.65	79.34	97.62	90.73
ydfH	140.31	47.48	0.34	233.45	127.13	105.32	121.75	111.19	143.03	ydfH	62.36	9.51	0.15	77.54	53.78	57.67	56.55	57.79	70.83
ybdL	303.04	87.74	0.29	471.33	278.66	259.62	222.61	315.56	270.43	ybdL	167.01	30.28	0.18	190.27	136.32	206.66	131.15	157.98	179.66
pldB	135.23	46.34	0.34	212.55	79.65	100.61	123.7	142.93	151.94	pldB	81.22	14.99	0.18	93.07	76.66	75.71	60.65	77.7	103.5
soxS	81.93	25.74	0.31	119.33	76.57	61.08	70.73	15.05	46.85	soxS	54.72	4.76	0.09	58.08	36.23	51.36	34.63	32.57	22.03
pyrG	465.16	152.55	0.33	727.36	449.65	515.89	319.21	311.9	466.93	pyrG	116.48	20.95	0.18	136.98	96.12	138.08	87.28	117.8	122.62
serA	NaN	NaN	NaN	0	0	0	0	0	0	serA	NaN	NaN	NaN	0	0	0	0	0	0
yfhG	76.73	6.66	0.09	84.24	74.41	13.85	71.53	0	39.45	yfhG	52.81	0	0	36.22	45.39	52.81	45.83	0	24.17
mscS	558.96	148.75	0.27	648.57	448.26	667.06	501.91	737.58	350.38	mscS	576	29.44	0.05	609.19	582.05	581.58	599.66	530.37	553.16
U66	NaN	NaN	NaN	0	0	0	0	0	0	U66	NaN	NaN	NaN	0	0	0	0	0	0
rhlE	102.87	9.83	0.1	0	98.33	111.79	114.29	91	98.96	rhlE	61.51	9.46	0.15	0	73.05	63.82	51.14	67.05	52.51
ybdH	75.73	22.98	0.3	101.72	37.06	58.11	33.94	0	67.35	ybdH	53.74	0	0	44.32	37.51	53.74	31.1	45.48	38.68
yhcF	68.78	22.45	0.33	93.86	50.54	30.25	61.94	40.31	42.23	yhcF	56.22	0	0	56.22	41.28	45.98	36.58	33.29	21.71
gcvA	86.35	12.8	0.15	97.09	99.77	88.52	75.32	0	71.07	gcvA	53.78	0	0	34.99	34.68	53.78	31.76	0	29.08
yfdL	71.53	17.82	0.25	90.95	55.93	0	67.71	0.7	30.39	yfdL	50.31	0	0	50.31	38.36	48.35	38.7	28.03	19.44
yfhK	69.05	17.87	0.26	89.68	59.02	58.45	37.25	0	33.48	yfhK	52.86	0.66	0.01	53.62	52.56	52.41	41.66	0	22.83
yggM	84.95	17.43	0.21	116.04	84.59	90.87	75.2	65.94	77.09	yggM	57.56	6.54	0.11	42.12	50.97	66.57	55.76	56.92	49.55
ynfE	113.96	0	0	113.96	46.5	0	40.64	0.99	10.93	ynfE	NaN	NaN	NaN	38.87	33.57	38.17	31.17	28.45	16.87
ybjK	80.12	27.46	0.34	108.2	34.39	78.82	39.33	48.1	53.33	ybjK	57.14	4.63	0.08	60.42	45.67	53.86	22.37	39.67	30.6
ybiH	247.63	138.64	0.56	485.84	74.06	217.96	242.61	295.45	169.89	ybiH	248.82	36.19	0.15	288.09	256.34	236.67	235.4	191.33	285.1
speE	376.66	62.92	0.17	489.77	375.36	402.5	332.69	327.83	331.79	speE	129.48	37.95	0.29	184.78	99.83	157.74	81.61	117.63	135.31
gcvP	88.73	33.24	0.37	152.04	88.41	84.52	68.46	56.33	82.6	gcvP	73.22	12.72	0.17	82.21	42.43	64.22	28.66	40.82	43.43
yfdV	112.78	45.19	0.4	94.61	142.94	85.93	97.07	189.45	66.7	yfdV	142.24	19.43	0.14	171.76	144.45	139.41	134.09	112.88	150.84
b2639	111.41	25.66	0.23	141.72	114.7	129.75	82.37	0	88.51	b2639	63.8	6.9	0.11	71.76	48.06	59.53	41.75	0	60.13
ydjN	288.73	174.18	0.6	532.89	251.82	119.07	230.9	127.98	469.7	ydjN	59.26	6.93	0.12	51.41	38.79	66.86	39.48	55.88	62.9
pyrH	105.48	24.41	0.23	148.24	104.96	101.46	113.07	78.82	86.32	pyrH	66.96	12.77	0.19	87.33	55.15	61.5	59.76	45.93	71.05
yafS	79.63	28.77	0.36	135.6	72.13	60.75	78.13	55.68	75.47	yafS	66.96	6.99	0.1	71.97	69.93	58.97	47.66	31.32	48.57
ybjJ	108.25	49.26	0.46	180.83	75.2	96.76	38.47	27.8	80.2	ybjJ	64.76	19.68	0.3	87.44	54.61	46.76	45.85	36.31	52.23
ykgJ	104.71	30.59	0.29	161.17	103.1	113.04	77.01	90.22	83.72	ykgJ	59.28	6.42	0.11	68.8	54.81	63.1	54.44	48.06	55.26
speB	75.27	22.36	0.3	111.74	66.51	70.43	51.42	0	76.26	speB	64.29	10.21	0.16	71.51	43.41	57.07	38.3	0	33.72
yfdU	62.1	16.79	0.27	86.96	57.42	47.22	51.13	23.91	52.87	yfdU	59.97	5.18	0.09	61.26	54.26	64.38	41.85	33.7	37.51
luxS	75.75	30.19	0.4	97.1	54.4	48.93	36.95	9.28	35.56	luxS	61.3	8.69	0.14	55.15	41.39	67.44	28.71	33.92	23.69
asr	71.11	0	0	71.11	0	0	30.01	2.18	22.23	asr	NaN	NaN	NaN	37.17	0	35.91	25.99	29.87	19.08
psiF	75.94	17.81	0.23	89.43	55.75	82.64	0	12.48	36.75	psiF	61.71	0	0	61.71	46.42	49.05	0	32.6	47.23
dpiB	90.02	0	0	90.02	44.56	48.56	31.08	17.82	26.56	dpiB	NaN	NaN	NaN	48.83	41.87	44.94	22.8	32.24	17.3
insA_7	135.38	40.43	0.3	205.94	121.8	29.17	120.65	102.7	125.8	insA_7	84.93	18.63	0.22	118.36	75.01	89.47	75.38	64.78	86.57
rnk	204.78	81.84	0.4	347.48	216.01	180.2	205.98	183.51	95.5	rnk	103.29	15.47	0.15	128.96	99.78	111.59	102.96	87.02	89.44
phnL	NaN	NaN	NaN	45.29	44.06	0	25.54	0	0	phnL	NaN	NaN	NaN	44.9	39.2	37.14	24.44	0	0
fryB	95.45	0	0	95.45	39.09	35.11	26.22	11.34	9	fryB	51.99	0	0	48.63	34.82	51.99	30.57	33.39	23.74
recX	67.66	18.05	0.27	86.74	50.86	65.37	49.64	0	37.45	recX	59.77	0	0	59.77	38.15	47.45	24.54	0	26.32
ydgI	121.37	43.98	0.36	180.3	93.9	102.83	105.44	73.68	172.09	ydgI	56.34	1.82	0.03	54.7	46.33	58.29	44.86	48.65	56.03
glnK	113.96	0	0	113.96	25.62	0	0	1.27	12.2	glnK	NaN	NaN	NaN	47.4	34.75	0	0	12.25	16.02
ydgH	115.77	56.78	0.49	227.9	86.47	119.35	97.16	77.78	85.97	ydgH	91.62	25.65	0.28	134.79	72.06	99.67	75.24	66.76	101.18
citC	124.8	0	0	124.8	30.44	37.98	18.18	0	16.15	citC	NaN	NaN	NaN	46.69	29.9	41.36	14.15	3.33	21.63
mgsA	97.47	37.83	0.39	160.49	100.67	87.59	68.54	53.25	114.3	mgsA	63.89	9.95	0.16	65.8	53.77	59.13	46.37	46.42	76.85
nrdG	104.87	34.38	0.33	170.63	103.17	77.76	87.89	108.32	81.43	nrdG	78.31	17.23	0.22	110.65	72.37	77.79	80.33	62.21	66.51
ucpA	87.2	28.64	0.33	132.76	92.79	50.06	84.04	65.25	98.26	ucpA	56.33	0	0	56.33	35.38	38.01	32.68	47.28	28.14
rhsA	54.36	5.7	0.1	50.33	41.47	58.4	14.05	0	33.19	rhsA	58.14	0	0	58.14	45.79	44.69	20.39	0	24.41
ydiM	65.79	16.69	0.25	77.6	42.39	34.38	53.99	35.58	0	ydiM	59.17	0	0	59.17	28.05	43.76	34.13	35.1	0
gcl	72.04	11.07	0.15	79.87	34.33	64.22	0	4.35	32.31	gcl	NaN	NaN	NaN	44.77	20.91	39.83	0	22.68	14.65
yegE	243.17	46.01	0.19	298.18	285.86	226.14	219.49	255.08	174.28	yegE	134.69	17.79	0.13	159.98	122.29	153.58	129.19	116.27	126.83
pntA	164.66	41.09	0.25	234.12	159.33	191.33	143.35	127.86	131.97	pntA	137.87	42.52	0.31	146.2	120.29	199.81	105.67	85.3	169.91
gadB	739.72	707.88	0.96	1911.78	824.9	98.65	537.93	325.32	0	gadB	2353.72	631.13	0.27	3261.67	2782.89	2212.64	2467.99	1484.49	1912.66
yfbS	86.14	21.45	0.25	110.71	76.58	8.17	71.13	0	45.65	yfbS	54.98	2.99	0.05	57.09	49.39	52.86	41.15	0	26.26
eutN	67.12	0	0	67.12	33.96	0	0	0	17.76	eutN	NaN	NaN	NaN	47.4	35.21	0	0	24.88	17.2
ygcU	66.71	17.24	0.26	94.85	57.11	71.77	54.77	34.59	55.04	ygcU	64.71	3.39	0.05	67.11	48.48	62.32	40.22	35.91	39.27
ydiF	NaN	NaN	NaN	0	40.68	46.18	28.89	0	0	ydiF	NaN	NaN	NaN	0	40.81	38.63	21.5	17.61	19.42
b4285	68.35	0	0	68.35	33.54	0	40.8	0	25.94	b4285	51.2	0	0	51.2	41.01	0	27.09	21.07	21.2
yfeN	69.85	28.45	0.41	102.7	52.94	53.91	46.6	43.2	46.78	yfeN	59.95	5.16	0.09	63.6	46.28	56.3	29.42	39.02	33.27
udk	98.05	64.48	0.66	143.83	54.78	51.05	51.48	37.92	189.08	udk	60.73	9.17	0.15	72.82	50.67	58.49	25.26	36.32	60.93
hdhA	85.48	34.01	0.4	132.56	75.86	107.63	60.79	38.69	50.57	hdhA	73.83	9.39	0.13	84.16	74.98	82.58	72.17	58.18	70.94
ubiX	309.77	56.83	0.18	364.78	308.17	392.53	261.71	259.3	272.13	ubiX	82.22	18.42	0.22	101.87	67.17	95	98.25	58.22	72.83
U139	NaN	NaN	NaN	0	0	0	0	0	0	U139	NaN	NaN	NaN	0	0	0	0	0	0
ygdL	83.72	31.05	0.37	115.51	82.18	42.73	42.88	41.08	53.47	ygdL	65.49	0	0	65.49	39.73	30.36	21.51	30.76	33.28
ydiS	NaN	NaN	NaN	0	27.67	0	5.2	0	0	ydiS	NaN	NaN	NaN	0	29.87	45.51	21.2	10.65	0
wrbA	NaN	NaN	NaN	0	0	0	0	0	0	wrbA	NaN	NaN	NaN	0	0	0	0	0	0
yqgA	68.01	18.11	0.27	88.63	54.68	60.7	46.59	18.63	19.76	yqgA	65.91	0	0	65.91	40.01	45.7	27.61	23.57	23.63
xapA	77.29	0	0	77.29	0	25.61	26.64	0	30.65	xapA	66.19	0	0	66.19	0	40.15	24.04	21.79	24.29
pdxY	99.34	31.29	0.31	133.52	85.61	132.52	75.63	69.41	49.72	pdxY	67.66	13.2	0.2	81.19	57.73	76.7	55.03	44.39	45.63
usg	67.54	16.59	0.25	79.27	48.59	15.58	55.81	0	40.56	usg	57.65	2.32	0.04	59.29	45.78	56.01	26.16	25.35	26.58
der	72.84	3.71	0.05	70.21	37.16	75.46	0	0	21.44	der	NaN	NaN	NaN	49.54	44.1	39.59	0	1.59	31.41
yqfA	74.16	26.99	0.36	93.24	55.07	13.96	33.14	17.35	14.74	yqfA	120.57	41.17	0.34	203.82	108.23	105.73	108.41	93.1	104.11
yncC	133.93	56.79	0.42	199.97	138.56	195.75	90.3	121.67	57.34	yncC	90.59	20.41	0.23	127.3	76.73	94.51	92.3	68.6	84.13
appA	83.5	30.04	0.36	104.74	40.52	0	62.26	20.45	37.39	appA	51.17	0	0	51.17	35.99	34.31	37.31	22.98	22.31
yghU	65.71	16.97	0.26	77.71	49.04	53.71	38.11	21.12	17.08	yghU	60.34	0	0	60.34	49.66	45.11	39.24	33.84	37.79
speC	87.48	24.36	0.28	126.16	99.68	68.14	59.92	75.97	95.02	speC	69.5	0	0	69.5	42.9	41.68	15.42	46.43	48.49
Empty	NaN	NaN	NaN	0	0	0	0	0	0	Empty	NaN	NaN	NaN	0	0	0	0	0	0
yfcU	83.61	18.03	0.22	96.36	0	70.86	0	0	40.6	yfcU	NaN	NaN	NaN	47.95	0	34.39	24.43	0	23.17
yfgA	243.53	64.92	0.27	333.02	248.91	183.32	167.36	227.22	301.33	yfgA	171.41	51.93	0.3	172.84	146.6	152.46	167.01	119.27	270.26
ygfF	76.72	0	0	76.72	47.82	0	19.46	0	2.43	ygfF	57.68	0	0	57.68	45.78	30.41	29.55	0	27.63
tam	116.31	35.3	0.3	145.94	154.42	122.74	95.81	121.13	57.85	tam	72.38	15.77	0.22	91.05	73.15	83.86	52.63	46.42	61.22
phoH	400.22	196.35	0.49	370.31	370.78	528.38	458.51	622.23	51.09	phoH	125.81	44.28	0.35	152.6	111.17	186.61	138.65	108.68	57.14
pldA	87.78	28.36	0.32	134.72	72.06	94.29	66.44	34.46	71.37	pldA	72.1	0	0	72.1	39.96	47.79	27.56	25.22	35.46
gssA	92.77	24.58	0.27	117.45	88.86	106.26	53.01	48.45	98.24	gssA	72.68	17.02	0.23	83.03	51.85	66.24	45.6	42.03	89.6
yigI	NaN	NaN	NaN	3	1	0	39.75	29.66	0	yigI	61.92	10.54	0.17	32.17	17.39	33.4	54.46	69.37	0
menG	188.5	53.51	0.28	262.09	120.85	230.28	145.65	166.92	205.19	menG	143.76	56.46	0.39	96.06	96.78	139.23	124.98	157.4	248.15
ybgD	50.5	0	0	0.68	0.02	0	50.5	34.4	0	ybgD	66.7	8.39	0.13	15.35	13.12	0	60.76	72.63	0
ycgE	227.91	73.27	0.32	253.69	241.37	214.47	204.14	339.24	114.53	ycgE	227.26	47.76	0.21	213.67	204.33	210.39	195.04	216.66	323.48
csgC	60.61	4.62	0.08	57.35	29.8	5.96	63.88	27.1	12.49	csgC	72.42	0	0	41.75	23.68	36.61	72.42	38.02	15.51
entF	82.78	0	0	1.21	16.65	1.46	82.78	42.86	0	entF	67.85	6.62	0.1	21.43	14.47	28.73	72.53	63.17	0
moaA	371.16	71.15	0.19	448.02	367.33	324.18	359.07	456.2	272.16	moaA	124.55	53.19	0.43	177.16	54.48	18.15	87.69	171.78	131.61
lacZ	NaN	NaN	NaN	0	0	0	0	0	0	lacZ	NaN	NaN	NaN	0	0	0	0	0	0
rhtB	75.27	3.3	0.04	3	18.19	0	77.61	72.94	0	rhtB	66.58	13.77	0.21	52.72	31.32	57.77	82.52	73.3	30.52
cobU	85.43	16.53	0.19	0	82.87	0	70.33	103.1	32.13	cobU	85.29	0	0	0	20.78	0	46.16	85.29	30.81
ybhC	217.86	49.33	0.23	193.32	183.47	247.41	190.07	306.04	186.88	ybhC	84.62	24.66	0.29	68.63	53.5	105.24	89.21	119.35	71.77
ykgE	NaN	NaN	NaN	0	0	0	0	22.16	7.54	ykgE	68.79	0	0	18.57	0	0	0	68.79	0.64
mviN	83.89	2.52	0.03	0	0	0	82.11	85.67	0	mviN	75.81	0	0	0	0	0	48.71	75.81	0
acpP	755.25	126.16	0.17	976.66	683.59	597.4	769.71	740.28	763.88	acpP	335.61	37.73	0.11	370.77	276.59	346.44	378.19	324.79	316.88
iaaA	199.49	124.34	0.62	370.58	125.51	80.09	340.08	168.14	112.56	iaaA	147.19	72.6	0.49	114.26	68.74	103.3	139.13	185.36	272.37
folE	338.67	207.09	0.61	453.01	182.48	302.43	196.54	192.68	704.9	folE	155.8	66.25	0.43	105.9	82.67	170.26	110.72	227.02	238.21
hemB	53.41	0	0	3	0	0	53.41	35.9	0	hemB	60.01	7.41	0.12	30.5	0	0	54.77	65.24	22.12
mcrA	134.57	47.48	0.35	148.16	95.26	178.22	118.58	194.33	72.86	mcrA	88.89	25.07	0.28	50.61	39.1	93.95	99.87	118.12	81.89
serA	NaN	NaN	NaN	0	0	0	0	0	0	serA	NaN	NaN	NaN	0	0	0	0	0	0
yahK	57.41	0	0	20.31	4.25	1.32	57.41	24.73	0	yahK	73.12	11.88	0.16	28.35	14.86	38.6	64.72	81.52	12.66
ycgM	62.48	0	0	0	10.17	0	49.59	62.48	0	ycgM	55.24	4.87	0.09	0	13.81	0	51.8	58.69	0
U66	NaN	NaN	NaN	0	0	0	0	0	0	U66	NaN	NaN	NaN	0	0	0	0	0	0
hemA	121.73	37.77	0.31	154.72	112.28	56.59	151.48	147.1	108.19	hemA	62.57	4.11	0.07	47.33	22.16	15.01	65.47	59.66	27.63
bisC	83.36	26.59	0.32	110.7	21.72	21.23	81.78	57.59	26.17	bisC	64.57	5.83	0.09	30.76	23.47	23.21	68.69	60.45	19.85
entD	NaN	NaN	NaN	3	0	0	24.17	32.9	0	entD	63.13	0	0	12.33	0	0	46.06	63.13	0
yahB	171.19	66.25	0.39	196.67	165.83	133.56	172.74	278.49	79.88	yahB	110.15	20.81	0.19	96.32	92.02	90.18	139.54	113.41	129.42
fiu	89.66	10.49	0.12	3	43.59	77.64	96.98	94.37	9.44	fiu	66.36	21.99	0.33	27.3	10.78	32.88	50.81	81.9	19.43
ybaO	68.57	13.99	0.2	63.65	61.83	51.45	85.57	85.81	63.08	ybaO	69.42	0	0	16.59	22	14.55	47.37	69.42	13.46
ycjM	165.88	47.24	0.28	240.76	177.92	115.99	146.45	148.31	0	ycjM	65.58	13.66	0.21	16.07	28.83	8.53	55.92	75.24	0
pabC	80.58	22.52	0.28	55.21	46.61	46.96	98.21	88.32	47.25	pabC	70.41	0.05	0	34.45	12.26	17.1	70.45	70.38	23.62
yeiG	268.15	49.27	0.18	325.06	264.53	214.34	267.94	323.26	213.8	yeiG	107.86	26.28	0.24	120.35	81.14	72.57	136.1	131.02	105.96
mobA	92.69	27.71	0.3	112.28	31.81	0	73.09	13.94	28.38	mobA	58.37	11.71	0.2	35.38	36.21	0	50.1	66.65	23.54
lipA	336.15	88.74	0.26	459.38	258.55	438.41	284.32	273.83	302.44	lipA	117.46	23.36	0.2	124.73	89.36	86.23	135.24	132.74	136.48
yaiM	NaN	NaN	NaN	0	0	0	47.93	0	0.53	yaiM	NaN	NaN	NaN	0	0	0	39.03	0	0
ybiO	NaN	NaN	NaN	0	0	0	37.68	28.45	0	ybiO	66.46	0	0	16.43	0	0	43.45	66.46	0
cueR	85.78	22.23	0.26	74.92	62.46	38.17	104.86	72.87	113.79	cueR	74.81	8.38	0.11	26.01	34.64	21.58	69.47	70.49	84.47
ycbR	58.09	0	0	0	0	0	58.09	1.78	0	ycbR	54.34	1.14	0.02	0	0	0	55.15	53.54	0
molR_2	65.21	0	0	2.1	0	0	65.21	21.71	0	molR_2	64.89	4.01	0.06	10.65	0	0	67.72	62.05	1.41
ispB	252.88	44.92	0.18	281.14	255.09	211.26	254.05	319.12	196.62	ispB	106.75	24.34	0.23	113.58	93.51	72.58	139.76	125.62	95.43
yoaH	79.81	24.17	0.3	80.61	0	0	103.57	55.25	45.57	yoaH	66.73	9.35	0.14	20.42	0	0	60.12	73.34	8.67
lipB	90.55	22.85	0.25	105.85	66.19	76.76	81.87	122.09	48.99	lipB	72.7	2.29	0.03	41.57	8.5	14.98	71.08	74.31	29.97
yaiP	63.17	0	0	34.29	44.98	1.43	43.19	63.17	0	yaiP	70.67	17.36	0.25	54.41	57.48	33.73	89.42	81.36	0
ybjS	298.53	47.47	0.16	362.08	262.42	357.08	265.36	271.12	273.15	ybjS	72.7	3.67	0.05	68.87	19.03	43.82	76.19	73.03	48.6
allR	82.36	19.5	0.24	45.95	62.3	43.67	104.68	92.14	70.33	allR	75.4	7.24	0.1	41.64	37.31	30.7	67.06	79.19	79.97
ycbB	71.01	14.86	0.21	81.47	51.93	66.12	65.62	89.91	37.86	ycbB	94.22	18.88	0.2	32.62	48.64	47.57	112.71	94.96	74.98
ubiE	143.61	26.37	0.18	191.89	120.98	128.84	144.86	150.59	124.49	ubiE	75.94	17.64	0.23	81.35	50.95	58.38	97.07	87	80.92
yiaD	NaN	NaN	NaN	34.54	0	0	37.69	29.65	0	yiaD	69.51	0	0	15.62	0	0	43.38	69.51	0
aaeR	101.18	0	0	101.18	0	0	30.99	25.93	8.01	aaeR	60.41	7.85	0.13	39.04	0	0	54.86	65.96	18.37
ynfK	NaN	NaN	NaN	2.93	0.98	0	31.54	0	0	ynfK	58.6	0	0	23.09	26.19	0	58.6	42.82	0.51
ybdG	80.73	17.81	0.22	90.66	55.68	0	95.76	80.8	0	ybdG	68.12	10.34	0.15	9.34	18.74	0	60.81	75.43	0
hcp	NaN	NaN	NaN	3	0	0	34.12	42.08	0	hcp	58.75	0.12	0	28.89	0	0	58.83	58.66	13.23
sfmC	NaN	NaN	NaN	0	0	0	35.86	0	0.37	sfmC	NaN	NaN	NaN	0	0	0	38.87	48.81	0
hemG	NaN	NaN	NaN	0	0	0	0	0	0.03	hemG	NaN	NaN	NaN	0	0	0	0	0	0
hemN	61.71	13.04	0.21	24.64	0	0	70.93	52.48	22.8	hemN	60.86	9.05	0.15	10.57	0	0	54.46	67.26	5.28
yihD	98.83	25.67	0.26	135.03	70.04	90.97	84.31	113.8	8.55	yihD	106.19	22.44	0.21	111.79	94.6	96.91	136.53	123.46	73.84
kbaZ	53.66	0	0	0	0	0	53.66	0	0	kbaZ	53.34	0	0	0	0	0	43.73	53.34	2.44
intF	75.86	12.43	0.16	20.01	0	0	84.65	67.07	6.78	intF	62.51	9.63	0.15	30.28	0	0	55.7	69.32	4.17
ybeF	71.02	0	0	0	0	0	71.02	39.66	1.26	ybeF	54.15	0.83	0.02	0	0	0	53.56	54.74	0.62
ybjE	142.16	35.07	0.25	161.31	114.68	185.27	126.62	169.55	95.51	ybjE	62.89	13.27	0.21	40.8	34.74	44.72	53.51	72.27	33.95
b0663	67.86	0	0	0	0	0	67.86	1.05	0	b0663	61.59	7.12	0.12	0	0	0	56.56	66.63	0
mntR	63.87	5.39	0.08	30.85	32.73	0	60.06	67.68	0	mntR	58.27	0	0	22.15	15.48	0	58.27	29.98	0
mog	92.13	0	0	44.58	41.02	0	92.13	35.58	16.95	mog	69.39	3.84	0.06	29.1	11.87	0	66.68	72.11	14.68
hemL	70.62	14.8	0.21	83.73	58.3	0	67.33	55.46	88.27	hemL	67.28	0	0	14.96	5.82	0	47.45	67.28	11.33
yhaK	NaN	NaN	NaN	2.58	0	0	28.81	26.04	2.17	yhaK	52.25	0	0	38.38	18.1	0	44.41	52.25	13.37
menD	NaN	NaN	NaN	3	0	0	34.39	2.55	0	menD	NaN	NaN	NaN	0	0	0	38.06	41.83	0
hscC	NaN	NaN	NaN	0	18.29	0	30.12	0	0	hscC	NaN	NaN	NaN	0	21.7	0	38.57	0	0
yccA	190.27	48.63	0.26	232.37	148.39	231.4	120.54	178.53	230.38	yccA	99.77	37.07	0.37	78.79	55.74	90.75	95.88	112.6	164.82
ubiC	73.97	15.08	0.2	89.97	60	0	71.93	0	0	ubiC	80.81	0	0	43.81	22.75	0	80.81	0	0
yliI	58.39	7.75	0.13	23.77	11.73	0	52.9	63.87	0	yliI	52.86	0	0	22.62	5.87	0	44.91	52.86	0
pspE	73.68	19.66	0.27	96.31	44.08	0	63.9	60.84	42.4	pspE	67.01	10.75	0.16	29.04	14.61	0	59.41	74.61	29.13
folD	58.16	0	0	0.48	58.16	0	45.32	33.8	0	folD	56.83	0	0	14.52	13.05	0	44	56.83	3.53
yhdH	63.78	8.5	0.13	72.5	13.28	0	55.52	63.32	40.58	yhdH	56.14	6.67	0.12	27.32	14.99	0	51.42	60.85	18.12
menF	81.34	21.64	0.27	67.52	63.55	0	103.76	65.67	106.2	menF	61.36	9.69	0.16	38.45	18.32	0	54.5	68.21	37.84
abrB	85.93	10.45	0.12	76.55	46.06	0	84.03	97.19	27.05	abrB	73.85	1.3	0.02	15.3	25.58	0	74.78	72.93	13.24
U139	NaN	NaN	NaN	0	0	0	0	0	0	U139	NaN	NaN	NaN	0	0	0	0	0	0
ybhJ	NaN	NaN	NaN	3	0	0	0	13.21	0	ybhJ	NaN	NaN	NaN	12.67	0	0	49.15	47.8	0
ybjN	269.55	48.01	0.18	335.01	233.06	305.46	233.87	293.17	216.73	ybjN	124.14	44.82	0.36	129.32	96.54	104.98	132.78	76.31	204.91
wrbA	NaN	NaN	NaN	0	0	0	0	0	0	wrbA	NaN	NaN	NaN	0	0	0	0	0	0
ybhK	64.82	2.07	0.03	3.53	0	0	66.28	63.35	18.37	ybhK	67.03	9.81	0.15	32.77	0	0	60.09	73.96	15.35
yhcB	278.94	69.65	0.25	419.55	234.71	253.48	263.64	257.99	244.25	yhcB	135.97	36.08	0.27	138.59	86.8	117.63	139.23	136.5	197.08
folC	NaN	NaN	NaN	2.59	0	0	36.9	0.82	0	folC	NaN	NaN	NaN	0	0	0	46.24	33.36	0
ybgQ	NaN	NaN	NaN	0	0	0	26.13	7.92	0	ybgQ	53.06	2.43	0.05	0	0	0	51.34	54.78	0
pspB	NaN	NaN	NaN	3	0	0	0.37	11	0	pspB	52.56	0	0	5.76	0	0	52.56	39.52	0
pqiA	NaN	NaN	NaN	0	0	0	10.98	44.56	1	pqiA	66.14	0	0	0	0	0	66.14	43.81	17.95
folA	364.71	36.65	0.1	0	372.06	345.89	313.44	382.53	409.65	folA	113.32	38.33	0.34	0	106.27	62.06	123.92	105.96	168.4
sfmA	NaN	NaN	NaN	2.77	0	0	4.7	15.17	0	sfmA	61.37	0	0	2.36	0	0	44.55	61.37	0.13
moeA	NaN	NaN	NaN	3	32.34	0	25.27	21.38	31.93	moeA	55.12	1.73	0.03	26.44	21.95	0	53.89	56.34	17.26
yraM	70.03	0.99	0.01	69.33	22.81	0	42.85	24.86	70.72	yraM	61.78	8.24	0.13	17.29	23.1	35.29	67.72	65.24	52.37
Empty	NaN	NaN	NaN	0	0	0	0	0	0	Empty	NaN	NaN	NaN	0	0	0	0	0	0
mazE	67.47	8.03	0.12	0	19.14	59.36	67.64	75.4	13.32	mazE	64.04	2.24	0.03	0	35.46	10.72	65.62	62.46	30.27
solA	113.01	37.7	0.33	40.7	70.88	127.68	95.95	157.53	31.26	solA	61.25	9.78	0.16	59.28	50.79	18.27	76.5	63.91	55.79
ymcE	128.92	48.71	0.38	0	0	2.6	112.92	90.22	183.62	ymcE	70.99	20.82	0.29	0	0	24.24	56.19	62	94.8
hemH	NaN	NaN	NaN	3	0	0	0	0	18.75	hemH	NaN	NaN	NaN	26.4	0	0	0	0	32.19
bioB	130.74	79.03	0.6	3	19.84	246.29	116.73	83.82	76.1	bioB	67.88	14.98	0.22	52.05	16.44	79.08	58.22	82.16	31.6
lolB	80.39	17.53	0.22	3	60.18	7.96	89.57	91.44	9.79	lolB	71.47	15.07	0.21	54.52	35.77	25.28	76.54	83.35	41.66
yhbO	51.95	0	0	51.95	4.42	37.54	41.31	35.76	0	yhbO	64.76	4.36	0.07	31.47	14.19	8.13	67.84	61.68	24.52
yhbQ	98.57	0	0	98.57	0.99	0	1.58	0	0	yhbQ	64.13	9.47	0.15	37.91	32.26	48.04	70.83	57.43	0
yfeC	53.02	0	0	53.02	33.21	0	37.72	0	0	yfeC	74.97	30.94	0.41	39.27	47.56	59.49	110.59	54.83	32.33
valT	NaN	NaN	NaN	39.41	0	0	0	0	0	valT	60.72	5.28	0.09	25.26	19.68	36.5	64.45	56.98	0
yaeH	95.76	54.13	0.57	134.04	57.49	38.47	0	32.17	0	yaeH	96.25	23.36	0.24	85.72	89.77	93.07	137.11	104.4	67.45
glyU	59.45	0	0	59.45	0	0	0	0	0	glyU	92.06	0	0	25.95	0	0.29	92.06	0	0
glnU	NaN	NaN	NaN	24.41	0	0	1.73	0	0	glnU	59.37	0	0	41.66	0	42.04	59.37	18.25	0
yfiF	264.01	61.01	0.23	318.12	269.14	212.05	168.73	306.58	309.45	yfiF	87.4	19.39	0.22	71.69	61.98	95.79	102.55	105.02	48.02
lacZ	NaN	NaN	NaN	0	0	0	0	0	0	lacZ	NaN	NaN	NaN	0	0	0	0	0	0
yhbU	NaN	NaN	NaN	0	0	0	0	0	0	yhbU	53.14	0	0	0	0	0.63	53.14	0.08	0
srmB	172.6	62.59	0.36	268.03	149.22	109.74	110.05	181.26	217.27	srmB	65.12	10.63	0.16	52.41	22.55	37.62	70.24	76.74	61.09
ileV	NaN	NaN	NaN	0.49	0	0	0	0	0	ileV	78.4	0	0	11.79	0	24.28	78.4	0	0
ykfA	NaN	NaN	NaN	43.87	0	0	0	0	0	ykfA	61.87	0	0	16.42	0	0	0	61.87	0.41
deaD	68.84	0	0	68.84	0	0	0	0	0	deaD	61.42	0	0	32.62	0	33.61	61.42	24.65	7.41
glnW	NaN	NaN	NaN	14.75	0	0	0	0	0	glnW	59.63	0	0	8.09	0	34.58	59.63	42.12	0
rof	207.22	131.51	0.63	425.65	225.18	115.26	10.98	168.62	101.4	rof	239.05	48.79	0.2	273.3	190.17	214.27	276.39	183.82	296.32
def	215.02	90.38	0.42	376.3	238.02	124.82	229.95	160.17	160.86	def	167.04	38.99	0.23	171.28	132.97	139.56	198.57	133.34	226.52
b0671	NaN	NaN	NaN	1.23	0	0	0	0	0	b0671	52.25	0	0	15.06	0	0	52.25	0.86	0
trxC	61.6	0	0	61.6	0	0	0	0	0	trxC	NaN	NaN	NaN	28.11	0	0.45	29.33	0.9	1.18
serA	NaN	NaN	NaN	0	0	0	0	0	0	serA	NaN	NaN	NaN	0	0	0	0	0	0
yagI	164.09	0	0	164.09	49.79	23.52	0	0	10.45	yagI	71.19	13.08	0.18	39.62	64.62	68.44	90.32	61.37	42.07
pnp	99.6	62.06	0.62	170.07	38.4	75.68	43.29	53.06	0	pnp	74.86	20.77	0.28	50.89	43.93	88.3	102.76	61.59	70.78
U66	NaN	NaN	NaN	0	0	0	0	0	0	U66	NaN	NaN	NaN	0	0	0	0	0	0
qseB	NaN	NaN	NaN	35.89	0	1.46	21.45	0	0	qseB	NaN	NaN	NaN	13.64	0	42.7	47.33	41.1	0
slyX	133.45	0	0	133.45	49.92	23.66	19.14	18.2	0	slyX	NaN	NaN	NaN	33.44	24	24.53	48.93	22.07	0
rhsE	NaN	NaN	NaN	8.01	0	0	0	0	0	rhsE	67.88	0	0	17.91	0	0.63	67.88	2.61	0
metZ	65.33	0	0	65.33	0	0	0	0	0	metZ	64.72	0	0	37.38	0	48.04	64.72	45.93	0
dxr	NaN	NaN	NaN	48.78	0	0	0	0	0	dxr	60.76	10.53	0.17	23.24	0	31.76	68.2	53.31	0
yadC	94.9	59.93	0.63	137.28	31.12	0	1.93	52.52	2.49	yadC	65.92	18.57	0.28	44.04	45.86	50.92	92.45	64.61	55.7
rhsD	NaN	NaN	NaN	48.92	0	0	0	0	0	rhsD	NaN	NaN	NaN	13.56	0	0	33.56	27.78	0
prpR	NaN	NaN	NaN	44	8.61	0	0	18.04	0	prpR	60.4	3.89	0.06	21.88	13.47	49.03	63.15	57.65	0
zupT	280.45	57.28	0.2	354.14	293.32	277.4	193.96	322.66	241.22	zupT	215.96	45.21	0.21	203.38	133.72	238.97	244.79	214.94	259.95
kdtA	179.9	113.59	0.63	310.92	0	0	119.69	109.09	0	kdtA	50.08	0	0	30.83	0	0	50.08	38.73	0
prpB	NaN	NaN	NaN	0	0	0	0	0	0	prpB	NaN	NaN	NaN	18	0	0	15.76	0	0
yaeQ	101.4	32.56	0.32	143.56	94.61	64.59	45.23	0	102.82	yaeQ	68.29	0	0	36.82	42.54	39.84	68.29	0	41.61
yafT	NaN	NaN	NaN	30.57	0	0	0	0	0	yafT	58.82	0	0	19.19	0	22.74	58.82	45.61	0
serW	1467.52	579.72	0.4	1417.09	858.53	2025.57	0	946.24	2090.19	serW	240.47	160.15	0.67	314.13	117.16	259.92	0	54.16	456.98
agaR	114.92	72.74	0.63	166.35	63.48	38.06	25.39	44.91	0	agaR	69.4	17.65	0.25	50.18	32.07	74.74	91.18	61.52	0
serX	605.26	203	0.34	695.01	446.17	576.72	347.71	928.53	637.44	serX	66.08	9.65	0.15	56.21	37.56	62.9	79.19	19.99	66.02
ecfG	75.72	0	0	75.72	0	0	0	6.62	0	ecfG	62.16	9.16	0.15	31.3	24.79	45.34	68.64	55.68	0
yifE	1569.78	689.08	0.44	2273.71	0	525.85	1895.93	1254.58	1898.84	yifE	278.06	66.69	0.24	288.17	0	323.78	262.77	172.52	343.05
hyaA	NaN	NaN	NaN	3	0	0	0	0	0	hyaA	81.11	17.31	0.21	72.25	105.78	42.39	79.81	66.6	40.39
proL	97.3	0	0	97.3	0	0	0	0	0	proL	NaN	NaN	NaN	19.24	0	0	0	0	0
yafJ	NaN	NaN	NaN	0	0	23.46	0	15.79	0	yafJ	52.89	0	0	0	0	46.14	48.59	52.89	0
hepA	58.24	1.14	0.02	59.08	56.95	49.17	39.58	58.7	0	hepA	60.82	0	0	31.81	22.57	30.47	60.82	48.89	0
yhaJ	137.3	57.67	0.42	229.95	112.08	145.25	62.81	166.82	106.88	yhaJ	108.92	30.31	0.28	102.93	62.7	112.26	122.65	98.17	154.81
ydhQ	62.47	0	0	62.47	0.24	0	2.88	0	0	ydhQ	64.76	16.47	0.25	67.28	20.5	50.36	86.97	54.42	34.55
yqjI	63.08	0	0	63.08	0	41.64	19.32	39.41	0	yqjI	65.38	0	0	23.61	0	45.11	45.96	65.38	0
iap	67.44	3.15	0.05	69.67	15.62	0.78	2.63	0	65.22	iap	67.57	15.74	0.23	34.42	40.59	39.32	78.7	56.44	32.53
ghrA	66.69	0	0	66.69	0	0	0	0.9	0	ghrA	107.45	0	0	28.23	10.33	14.32	107.45	3.45	0
argW	641.45	235.14	0.37	1022	616.38	550.3	296.13	691.23	672.64	argW	240.3	95.53	0.4	296.94	226.3	161.39	238.46	126.56	392.16
b0257	NaN	NaN	NaN	41.88	0	24.83	0	0	0	b0257	56.78	0	0	17.43	0	27.19	56.78	34.39	0
pcnB	915.53	262.7	0.29	1174.66	833.45	1014.07	526.76	744.17	1200.07	pcnB	314.05	124.98	0.4	309.13	229.5	365	213.35	227.92	539.37
yhdA	125	13.31	0.11	124.69	117.48	114.02	16.43	143.83	0	yhdA	108.56	17.89	0.16	118.69	85.75	93.88	128	116.5	0
serU	2953.62	1318.98	0.45	5351.59	3306.54	1800.21	2992.98	1859.3	2411.08	serU	843.67	418.16	0.5	926.72	555.62	543.19	914.57	515.67	1606.25
ybaY	65.3	0	0	45.75	0	38.25	13.45	65.3	0	ybaY	69.28	9.86	0.14	20.19	22.77	47.76	62.3	76.25	0
dgkA	57.67	0	0	57.67	18.75	26.16	7.94	7.11	0	dgkA	55.98	0	0	27.85	12.89	38.13	55.98	38.65	0
valV	156.82	71.66	0.46	269.86	176.84	81.81	122.83	132.74	0	valV	59.63	0	0	11.53	16.77	44.78	59.63	45.07	0
yibK	238.86	90.49	0.38	220.87	205.82	226.42	114.4	277.09	388.58	yibK	71.33	0.48	0.01	46.72	46.77	70.99	71.67	41.78	40.53
yagG	54.95	0	0	22.5	0	54.95	8.07	2.21	0	yagG	51.17	0.02	0	22.16	0	51.15	36.46	51.18	0
sufI	NaN	NaN	NaN	5.2	0	0	11.26	21.82	0	sufI	56.06	0	0	12.32	0	21.84	43.73	56.06	0
yhcM	131.34	42.13	0.32	199.49	140.51	139.72	78.23	96.01	134.12	yhcM	122.93	35.35	0.29	126.34	52.58	147.02	134.07	145.13	132.42
yeeO	NaN	NaN	NaN	0	0	0	0	32.55	0	yeeO	60.11	0	0	16.9	0	22.47	60.11	38.44	0
pgpB	138.42	48.69	0.35	215.5	144.66	141.78	62.46	137.2	128.91	pgpB	65.85	8.99	0.14	61.41	7.59	80.3	66.59	64.72	56.23
efp	126.58	83.54	0.66	180.9	0	56.13	77.91	70.86	247.11	efp	65.1	12.45	0.19	31.28	0	48.01	65.02	52.68	77.59
yeeI	65	0	0	65	0	18.19	24.36	40.98	0	yeeI	69.04	15.85	0.23	34.83	0	58.84	87.31	60.98	0
rhoL	131.08	28.3	0.22	138.66	156.12	89.59	110.17	164.92	127.04	rhoL	167.14	13.17	0.08	186.77	167.43	156.28	175.71	150.1	166.56
ygeX	NaN	NaN	NaN	6.09	0	20.29	9.86	9.81	0	ygeX	57.71	0	0	11.29	0	40.97	57.71	45.59	0
tyrV	52.68	0	0	0	48.94	52.68	0	41.85	1.46	tyrV	59.24	1.76	0.03	0	37.14	61.2	58.7	57.81	21.88
yraL	NaN	NaN	NaN	35.38	0	19.32	10.73	0	0	yraL	53.99	0	0	15.11	0	48.35	53.99	44.13	0
nac	104.85	0	0	26.46	42.69	23.02	48.84	104.85	14.41	nac	60.77	7	0.12	51.19	12.1	61.52	62.39	67.99	24.83
yfdC	NaN	NaN	NaN	3.76	0	11.11	4.37	36.58	0	yfdC	NaN	NaN	NaN	29.67	0	38.2	46.17	39.5	0
fklB	79.32	0	0	79.32	44.28	0	49.38	23.83	38.9	fklB	54.57	0	0	16.06	32.51	0	54.57	39.84	14.2
asnV	NaN	NaN	NaN	0	0	5.62	16.31	9.55	0	asnV	55.07	0	0	0	0	41.17	55.07	44.92	0
rho	65.79	0	0	65.79	0	23.31	29	30.02	0	rho	54.25	0	0	27.86	0	45.38	54.25	41.53	0
U139	NaN	NaN	NaN	0	0	0	0	0	0	U139	NaN	NaN	NaN	0	0	0	0	0	0
cysT	NaN	NaN	NaN	0	0	0	4.93	5.12	0	cysT	75.49	0	0	0	0	0	75.49	43.89	0
yraR	58.28	0	0	58.28	0	35.27	25	16.08	32.97	yraR	76.57	0	0	41.23	27.84	48.86	76.57	41.08	25.82
wrbA	NaN	NaN	NaN	0	0	0	0	0	0	wrbA	NaN	NaN	NaN	0	0	0	0	0	0
ecfD	207.19	48.24	0.23	275.44	196.63	195.96	140.57	249.65	184.88	ecfD	130.22	18.78	0.14	132.44	24.08	134.36	132.44	99.97	151.88
ytfM	61.15	11.44	0.19	69.23	40.89	0	53.06	23.71	15.63	ytfM	69.71	14.49	0.21	34.26	42.41	43.87	79.96	59.46	43.49
yejH	NaN	NaN	NaN	0	0	0	0	0	0	yejH	63.04	17.35	0.28	0	0	42.69	75.3	50.77	0
rlmB	NaN	NaN	NaN	48.81	0	20.36	20.46	0	0	rlmB	53.83	1.67	0.03	18.3	0	55.01	52.65	0	0
ppdD	NaN	NaN	NaN	10.65	0	0	9.28	24.41	0	ppdD	54.11	0	0	15.06	0	37.53	54.11	38.47	0
argQ	83.99	0	0	83.99	0	0	0	47.94	0	argQ	67.38	0.3	0	27.58	0	67.59	0	67.16	18.8
yhbP	69.55	12.48	0.18	83.39	0	66.13	37.71	59.14	0	yhbP	65.58	7.11	0.11	33.49	0	59.76	73.5	63.48	0
rsuA	125.28	40.71	0.32	187.66	152.41	93.93	76.5	109.31	131.85	rsuA	101.01	32.84	0.33	80.94	41.55	106.66	147.12	110.17	60.16
yqiJ	63.81	2.1	0.03	65.3	33.01	7.01	40.97	62.32	0	yqiJ	78.45	17.52	0.22	25.21	6.98	48.33	90.84	66.06	0
pmbA	108.12	12.98	0.12	117.29	43.76	8.34	38.75	30.11	98.94	pmbA	74.77	18.73	0.25	67.86	55.33	60.87	106.27	71.96	86.36
Empty	NaN	NaN	NaN	0	0	0	0	0	0	Empty	NaN	NaN	NaN	0	0	0	0	0	0
aspU	89.14	25.06	0.28	117.97	76.91	72.55	0	0	39.55	aspU	73.08	0	0	42.75	25.22	73.08	0	0	29.47
yadN	NaN	NaN	NaN	0	0	0	9.09	0	0	yadN	50.53	0.13	0	0	0	39.16	50.44	50.62	0
argZ	NaN	NaN	NaN	22.32	0	0	0	1.47	0	argZ	71.34	16.64	0.23	17.29	0	0	83.11	59.58	0
yhbT	89.28	24.35	0.27	106.49	7.09	72.06	9	39.17	3.37	yhbT	79.65	17.59	0.22	49.47	23.36	63.75	98.55	76.65	37.14
yfiC	56.8	0	0	0	0	32.9	56.8	27.08	0	yfiC	78.57	0	0	0	0	28.87	78.57	33.8	0
dacB	177.78	32.21	0.18	222.29	169.31	137.32	0	194.99	165.01	dacB	100.45	12.14	0.12	92.66	40.05	111.54	0	110.05	87.56
infA	2243.08	169.97	0.08	0	2426.49	2105.21	2091.89	2348.74	0	infA	317.33	145.12	0.46	0	200.66	428.09	456.81	183.75	0
cls	231.07	22.76	0.1	242.64	232.46	210	270.12	213.6	217.61	cls	152.96	56.45	0.37	65.09	157.29	188.53	194.91	105.22	206.71
tufA	266.39	52.51	0.2	252.03	325.4	185.66	298.19	304.32	232.73	tufA	217.19	51.15	0.24	121.69	246.93	231.09	233.97	203.2	266.25
yhbE	93.76	34.19	0.36	24.1	108.32	81.32	143.14	51.53	84.5	yhbE	114.27	30.81	0.27	22.62	108.46	141.54	149.93	78.08	93.35
fkpB	114.91	51.69	0.45	59.72	117.62	190.19	161.69	76.1	84.16	fkpB	121.2	23.41	0.19	19.43	117.53	143.36	144.31	88.39	112.42
yqjH	148.33	48.14	0.32	100.37	154.16	22.29	220.85	157.77	108.49	yqjH	138.1	45.11	0.33	64.93	142.15	200.43	162.86	120.57	137.67
hdfR	114.82	26.12	0.23	120.53	0	88.12	156.65	107.31	101.5	hdfR	140.1	31.45	0.22	28.69	0	166.24	148.47	94.4	151.3
lpxP	223.46	28.61	0.13	0	0	0	243.69	203.23	0	lpxP	241.39	24.62	0.1	0	0	0	258.79	223.98	0
sigma70	NaN	NaN	NaN	0	0	0	0	0	0	sigma70	NaN	NaN	NaN	0	0	0	0	0	0
nlpC	210.93	42.76	0.2	195.14	230.18	150.65	280.17	207.67	201.78	nlpC	178.85	65.02	0.36	85.25	167.59	219.35	220.1	124.68	256.15
slyD	923.91	103.53	0.11	1067.26	946.48	897.35	761.78	986.69	883.93	slyD	405.29	92.68	0.23	365.91	402.93	445.2	349.2	302.03	566.49
yhcO	104.52	45.59	0.44	55.03	153.05	35.38	152.53	87.95	74.05	yhcO	149	42.66	0.29	81.45	159.7	194.2	172.99	113.44	172.21
lpxC	1487.56	397.99	0.27	1731.44	1390.09	1644.68	822.6	1359.4	1977.18	lpxC	556.69	281.5	0.51	243.31	464.47	741.75	348.74	525.79	1016.1
map	171.61	32.67	0.19	180.35	187.04	138.41	213.62	138.64	0	map	133.06	44.53	0.33	65.04	163.18	171.9	153.69	111.48	0
cysD	324	145.95	0.45	411.07	179.94	499.32	362.66	48.39	167.01	cysD	217.2	67.21	0.31	113.3	215.5	227.8	207.29	214.59	324.75
hrpA	101.91	25.54	0.25	43.39	82.86	110.34	134.3	80.13	0	hrpA	118.65	22.08	0.19	14.59	93.72	135.75	126.48	46.74	0
hsdM	122.65	33.47	0.27	94.66	147.55	85.19	173.75	109.37	125.37	hsdM	128	32.96	0.26	36.53	131.17	150.49	153.41	71.81	133.13
msbB	123.08	27.57	0.22	83.13	0	125.41	157.62	113.64	135.61	msbB	131.88	35.98	0.27	36.7	0	162.81	141.35	79.9	143.47
rfaZ	121.15	36.64	0.3	65.09	149.68	105.67	171.05	116.22	119.17	rfaZ	138.01	35.06	0.25	33.27	157.57	180.64	144.59	91.19	116.05
sigmaS	NaN	NaN	NaN	0	0	0	0	0	0	sigmaS	NaN	NaN	NaN	0	0	0	0	0	0
frr	300.46	30.77	0.1	336.05	325.29	259.47	319.62	275.72	286.6	frr	180	54.07	0.3	93.36	219.06	219.07	199.48	131.96	217.06
tesB	138.24	40.61	0.29	77.16	154.69	138.18	201.02	120.8	137.59	tesB	148.36	25.81	0.17	27.02	155.8	173.59	150.43	104.86	157.12
U66	NaN	NaN	NaN	0	0	0	0	0	0	U66	NaN	NaN	NaN	0	0	0	0	0	0
fldB	141.22	24.16	0.17	125.7	0	128.97	177.19	133.02	0	fldB	115.77	53.49	0.46	26.53	0	157.51	134.32	55.48	0
cmk	84.68	18.68	0.22	13.51	89.46	83.19	105.57	60.49	32.25	cmk	102.65	29.13	0.28	12.08	116.18	124.55	115.74	52.1	104.7
pgsA	110.7	36.59	0.33	74.86	120.53	60.75	158.99	131.68	117.37	pgsA	122.76	32.43	0.26	30.16	122.4	162.08	130.28	71.93	127.12
nlpA	134.55	55.34	0.41	101.12	156.42	128.86	218.34	54.12	148.43	nlpA	146.08	38.68	0.26	32.31	158.39	183.19	150.26	80.54	158.01
smf	103.27	22.59	0.22	44.8	118.6	81.17	134.19	85.27	97.1	smf	110.45	34.12	0.31	20.22	116.27	150.09	117.08	55.68	113.15
plsX	88.15	28.5	0.32	41.56	97.38	79.81	129.28	51	83.26	plsX	104.08	28.71	0.28	27.36	101.25	139.66	119.21	62.13	98.13
ribA	127.82	38.5	0.3	148.74	139.15	69.74	160.59	89.89	158.8	ribA	133.94	26.55	0.2	38.85	138.57	163.83	133.75	91.14	142.43
plsB	365.27	39.44	0.11	302.12	392.2	413.98	381.76	349.85	351.73	plsB	240.63	55.63	0.23	144.55	277.18	291.39	266.53	204.57	259.58
argP	110.78	29.61	0.27	82.91	129.07	109.34	160.7	87.95	94.71	argP	128.98	20.5	0.16	25.6	130.91	130.71	149.06	94.86	139.36
pyrB	2305.04	401.3	0.17	2488.46	2087.29	2764.14	1637.86	2565.62	2286.89	pyrB	227.17	115.53	0.51	228.34	115.59	376.59	69.51	292.23	280.77
lepA	341.1	19.77	0.06	321.89	334.91	347.01	343.3	375.81	323.69	lepA	195.57	49.21	0.25	128.23	201.98	249.04	206.63	146.12	241.44
blc	106.75	37.72	0.35	50.48	138.3	119.99	152.54	96.37	82.8	blc	128.96	24.93	0.19	42.9	139.55	136.09	144.14	84.65	140.4
yhdN	162.49	43.09	0.27	135.74	201.92	184.78	208.52	98.34	145.65	yhdN	185.99	44.09	0.24	122.36	195.32	236.93	200.01	143.67	217.62
rffC	108.75	20.28	0.19	6.23	97.13	115.3	134.12	40.27	88.45	rffC	105.01	32.76	0.31	19.82	115.14	129.77	130.76	51.5	97.9
vacJ	287.58	35.43	0.12	288.5	274.49	228.27	335.64	298.41	300.17	vacJ	193.56	56.13	0.29	108.93	201.97	225.43	198.33	155.46	271.21
yjeK	150.52	31.45	0.21	121.08	187.53	124.67	191.57	146.08	132.16	yjeK	140.75	47.62	0.34	64.03	169.97	182.29	155.45	100.21	172.57
dfp	134.48	72.46	0.54	26.61	121.09	233.19	0	58.75	124.9	dfp	95.7	29.9	0.31	22.94	113.33	108.06	0	50.96	110.45
ymgC	76.54	25.79	0.34	72.25	75.78	54.22	119.96	46.67	60.47	ymgC	107.02	28.51	0.27	29.48	128.12	128.13	118.93	60.53	99.41
nlpD	106.83	37.68	0.35	0	104.82	136.62	131.55	43.25	54.33	nlpD	121.46	24.52	0.2	0	125.02	153.73	110.88	49.36	96.19
ygjN	112.77	15.65	0.14	0	108.47	99.71	130.12	47.05	0	ygjN	113.13	38.44	0.34	0	137.83	141.06	115.62	58.03	0
bfd	271.7	95.08	0.35	168.29	234.36	300.15	445.51	251.07	230.83	bfd	420.21	78.07	0.19	410.08	335.22	509.57	489.91	452.51	323.99
tufB	108.16	38.98	0.36	38.6	91.77	24.9	152.65	24.17	80.04	tufB	115.59	32.18	0.28	18.43	117.07	153.85	136.3	70.86	99.86
rluD	245	42.1	0.17	222.38	290.01	219.47	306.44	205.91	225.79	rluD	225.66	53.95	0.24	177.83	235.67	261.92	257.4	142.05	279.06
ytfB	341.7	78.92	0.23	333.9	455.94	291.38	417.7	298	253.3	ytfB	310.26	92.48	0.3	203.64	355.76	330.37	336.83	198.92	436.04
nohB	NaN	NaN	NaN	3	0	0	0	37.79	0	nohB	74.39	0	0	14.97	0	0	0	74.39	0
panE	78.97	23.54	0.3	31.11	79.42	78.05	116.38	52.34	68.65	panE	97.95	26.21	0.27	9.67	96.86	114.41	125.24	56.37	96.88
lgt	148.23	45.63	0.31	81.19	152.81	207.53	168.91	109.49	169.46	lgt	118.26	25.27	0.21	31.76	112.81	150.08	123.8	80.27	124.34
ygjV	105.53	36.98	0.35	52.52	120.79	125.89	145.66	66.69	121.65	ygjV	112.13	36.53	0.33	27.69	124.66	135.6	141.06	50.63	108.7
yheO	395.52	56.4	0.14	411.16	437.64	355.76	439.16	429.9	299.5	yheO	318.8	29.26	0.09	270.85	316.44	344.93	352.17	305.89	322.54
prfC	122.96	49.75	0.4	59.11	120.08	183.32	158.94	39.18	93.32	prfC	114.8	22.78	0.2	5.33	113.81	141.75	117.52	49.9	86.12
rfaH	230	24.28	0.11	212.78	235.76	276.48	222.03	220.29	212.67	rfaH	127.46	45.61	0.36	53.26	142.18	187.74	126.17	104.9	150.53
msrA	161.6	58.34	0.36	139.93	238.61	181.38	210.9	104.67	94.11	msrA	180.82	48.57	0.27	110.75	218.45	217.51	193.29	128.7	216.23
rpmE	518.25	171.5	0.33	539.61	0	0	337.06	678.07	0	rpmE	114.26	34.37	0.3	74.74	0	0	137.2	130.84	0
tolA	85.33	21.93	0.26	37.43	91.24	70	113.79	66.3	48.21	tolA	104.78	33.54	0.32	22.29	133.22	131.18	112.65	51.44	95.39
prfB	228.7	69.06	0.3	240.77	234.61	270.69	272.99	261.75	91.41	prfB	169.85	46.5	0.27	115.56	147.83	225.84	206.65	124.49	198.7
yhaM	94.56	30.45	0.32	2.92	98.22	66.73	135.81	37.91	77.49	yhaM	110.34	15.69	0.14	10.54	101.81	123.64	123.42	44.47	92.5
yhfG	120.16	51.6	0.43	53.48	175.26	127.82	161.51	82.74	48.75	yhfG	152.65	51.65	0.34	80.15	195.1	202.24	171.19	96.49	170.71
tsf	83.46	36	0.43	57.14	100.32	63.28	139.27	0	57.28	tsf	104.54	32.87	0.31	25.23	106.12	141.18	129.23	59.17	86.98
glgS	301.74	142.16	0.47	293.51	458.45	148.09	478.11	275.52	156.77	glgS	534.51	102.29	0.19	532.55	652.62	448.38	556.56	387.84	629.09
yjgA	160.79	29.93	0.19	135.39	175.68	175.6	184.4	111.86	181.79	yjgA	140.03	38.1	0.27	40.67	156.15	159.35	160.3	72.11	152.21
thrU	131.41	25.83	0.2	3	113.76	161.06	119.41	0	0	thrU	126.21	6.22	0.05	35.27	122.85	133.39	122.39	45.39	0
yhjY	126.74	58.31	0.46	86.69	204.02	65.63	195.2	102.58	106.31	yhjY	220.62	77.04	0.35	121.88	279.28	173.04	312.28	164.73	272.52
plsC	112.52	37.72	0.34	48.63	123.1	104.39	162.13	57.36	115.64	plsC	119.28	36.74	0.31	37.95	119.18	169.79	121.08	65.96	120.39
yhbC	137.33	43.01	0.31	83.65	169.4	166.35	169.83	97.44	0	yhbC	141.87	22.16	0.16	21.53	138.83	165.39	121.39	47.34	0
ygjJ	89.14	30.01	0.34	0	98.21	60.52	127.29	13.34	70.55	ygjJ	118.46	26.76	0.23	0	110.82	134.51	144.23	42.61	84.27
ygiW	98.5	33.51	0.34	8.4	108.81	45.7	140.92	66.06	78.22	ygiW	120.21	34.89	0.29	43.4	131.36	140.82	146.75	60.1	122.04
greA	182.09	41.35	0.23	196.96	206.07	107.19	215.12	160.72	206.48	greA	151.45	52	0.34	86.44	172.62	201.37	164.83	87.03	196.45
ppiC	164.47	35.55	0.22	151.83	202.3	159.28	202.48	107.4	163.55	ppiC	137.46	35.19	0.26	47.05	152.7	157.57	157.28	75.22	144.54
ygiU	128.18	15.67	0.12	117.1	0	0	0	139.26	0	ygiU	71.62	24.65	0.34	54.19	0	0	0	89.05	0
priA	82.76	24.93	0.3	2.89	56.66	93.51	118.06	61.74	83.82	priA	112.8	9.06	0.08	24.96	107.47	123.9	116.16	49.39	103.66
rbfA	90.86	22.56	0.25	0	102.36	71.56	120.89	65.93	93.58	rbfA	112.01	25.73	0.23	0	84.11	134.6	133.15	48.25	96.17
yraQ	125.33	42.03	0.34	85.74	0	92.59	166.1	156.9	0	yraQ	121.24	38.89	0.32	29.64	0	151.33	135.06	77.32	0
U139	NaN	NaN	NaN	0	0	0	0	0	0	U139	NaN	NaN	NaN	0	0	0	0	0	0
ygiZ	101.98	25.46	0.25	0	102.72	16.18	127.06	0	76.16	ygiZ	96.81	17.59	0.18	0	109.36	104.9	102.18	0	70.79
smf_2	108.05	45.65	0.42	0	143.58	60.49	164.07	67.28	104.83	smf_2	123.21	40.41	0.33	0	127.83	158.79	151.02	56.34	122.06
wrbA	NaN	NaN	NaN	0	0	0	0	0	0	wrbA	NaN	NaN	NaN	0	0	0	0	0	0
pyrC	245.81	17.62	0.07	233.35	0	0	0	258.28	0	pyrC	92.65	42.66	0.46	62.48	0	0	0	122.81	0
yohD	150.42	43.84	0.29	117.73	188.81	191.28	190.72	108.55	105.45	yohD	132.45	30.37	0.23	42.77	155.11	147.17	136.56	79.44	143.97
glgB	110.55	31.81	0.29	9.64	140.07	112.32	143.58	75.87	80.92	glgB	126.73	40.55	0.32	30	128.26	164.91	156.92	62.08	121.48
psd	123.63	40	0.32	60.99	141.68	153.29	155.16	107.01	0	psd	125.1	32.31	0.26	33.84	127.68	161.26	128.81	82.63	0
ygjQ	121.58	28	0.23	0	101.78	141.38	0	0	0	ygjQ	124.51	14.84	0.12	0	114.02	135	0	0	0
ygiD	110.57	40.26	0.36	22.73	103.17	158.41	143.19	59.77	88.3	ygiD	117	44.6	0.38	31.38	124.61	157.33	159.92	59.27	83.88
fkpA	113.05	34.29	0.3	0	109.57	134.85	146.04	57.31	117.48	fkpA	124.1	38.18	0.31	0	125	158.03	137.47	59.14	140.87
rpsB	1645.45	238.18	0.14	1903.57	1892.61	1449.47	1310.28	1707.7	1609.1	rpsB	493.17	76.91	0.16	515.99	421.71	598.39	398.59	552.25	472.1
ligA	292.21	35.99	0.12	266.76	0	0	0	317.67	0	ligA	109.17	31.1	0.28	87.18	0	0	0	131.16	0
yohJ	105.38	35.01	0.33	71.72	75.73	136.1	148.29	20.78	95.05	yohJ	124.93	4.85	0.04	24.75	123.84	131.76	120.28	49.39	123.83
Empty	NaN	NaN	NaN	0	0	0	0	0	0	Empty	NaN	NaN	NaN	0	0	0	0	0	0
yhbX	127.71	34.08	0.27	42.12	146.11	0	166.53	98.26	99.92	yhbX	149.74	57.38	0.38	69.48	188.83	202.57	202.34	96.74	138.47
ygjR	111.56	35.23	0.32	26.88	0	112.87	152.51	66.43	114.44	ygjR	114.23	42.47	0.37	39.41	0	160.67	128.1	59.15	109.02
ygiF	113.74	54.31	0.48	23.84	147.75	76.92	171.42	58.88	0	ygiF	137.8	52.38	0.38	40.23	160.3	169.16	162.32	59.44	0
rfaQ	170.07	26.53	0.16	0	185.72	166.71	202.37	131.62	163.93	rfaQ	163.69	33.48	0.2	0	178.82	187.38	185.44	107.09	159.71
yfcG	123.74	41.54	0.34	0.47	152.38	157.81	151.84	75.91	80.78	yfcG	121.24	40.27	0.33	69.32	145.48	155.91	153.7	71.58	131.45
parC	100.18	34.14	0.34	62.66	0	0	129.42	108.45	0	parC	78.31	10.73	0.14	25.82	0	0	85.9	70.72	0
cysS	185.42	25.36	0.14	180.6	211.85	161.59	215.23	153.52	189.72	cysS	126.22	29.84	0.24	49.44	139.95	149.97	135.73	74.31	131.13
hrpB	133.38	16.85	0.13	124.46	155.95	135.76	0	0	117.36	hrpB	128.37	18.73	0.15	48.69	118.95	149.94	0	0	116.22
mazG	111.96	33.57	0.3	88.22	0	135.69	0	0	0	mazG	137.67	0	0	31.69	0	137.67	0	0	0
lysU	156.97	25.34	0.16	162.48	185.42	155.96	0	0	124.03	lysU	130.59	30.81	0.24	87.9	144.53	159.42	0	0	130.5
eutS	77.08	4.59	0.06	73.83	0	0	0	0	80.32	eutS	101.74	16.21	0.16	33.16	102.88	117.35	0	0	84.99
dusC	138.25	6.02	0.04	132.42	143.33	143.56	0	46.57	133.69	dusC	120.22	16.45	0.14	41.94	120.91	136.31	0	40.76	103.44
gltX	172.45	52.69	0.31	132.93	152.31	154.41	0	0	250.13	gltX	135.44	55.86	0.41	54.59	148	182.49	0	0	156.69
yebS	110.24	0	0	0	0	110.24	0	0	0	yebS	146.83	0	0	0	0	146.83	0	0	0
lacZ	NaN	NaN	NaN	0	0	0	0	0	0	lacZ	NaN	NaN	NaN	0	0	0	0	0	0
seqA	227.01	41.93	0.18	233.07	242.21	221.07	0	161.86	276.87	seqA	173.66	76.02	0.44	92.86	188.8	218.94	0	99.88	267.82
ygeQ	84.78	0	0	84.78	0	30.68	0	0	0	ygeQ	141.9	0	0	46.71	0	141.9	0	0	0
skp	439.18	98.53	0.22	553.23	502.51	457.2	0	376.12	306.84	skp	287.51	59.24	0.21	257.83	318.93	365.08	0	209.07	286.66
ypfG	87.04	22.5	0.26	85.2	65.52	110.41	0	0	0	ypfG	120.31	13.31	0.11	29.85	110.9	129.71	0	0	0
yeiE	148.13	68.09	0.46	148.16	217.19	55.49	0	0	171.7	yeiE	123.89	47.55	0.38	53.27	144.26	156.69	0	0	141.36
stpA	140.6	36.8	0.26	170.77	150.04	154.54	0	43.79	87.04	stpA	140.58	55.83	0.4	49.04	154.3	192.14	0	61.18	154.69
tolB	273.66	94.42	0.35	340.43	0	0	0	206.89	0	tolB	76.45	19.46	0.25	90.22	0	0	0	62.69	0
rluF	89.71	12.55	0.14	106.48	81.01	92.11	0	0	79.22	rluF	122.21	19.74	0.16	35.22	110.12	144.99	0	0	111.51
helD	142.63	22.08	0.15	116.67	160.07	161.86	0	0	131.92	helD	117.9	48.25	0.41	50.01	133.15	163.67	0	0	124.79
yagK	98.96	61.18	0.62	55.7	142.22	0	0	0	0	yagK	134.15	22.63	0.17	41.42	118.15	150.15	0	0	0
serA	NaN	NaN	NaN	0	0	0	0	0	0	serA	NaN	NaN	NaN	0	0	0	0	0	0
yffH	114.8	5.36	0.05	113.82	109.62	122.33	0	0	113.43	yffH	133.59	39.04	0.29	49.71	153.9	158.29	0	0	88.59
yejO	106.1	21.47	0.2	104.1	116.64	126.63	0	0	77.01	yejO	130.53	21.79	0.17	43.07	126.79	153.95	0	0	110.85
U66	NaN	NaN	NaN	0	0	0	0	0	0	U66	NaN	NaN	NaN	0	0	0	0	0	0
yohM	103.94	0	0	0	0	103.94	0	0	0	yohM	130.35	0	0	0	0	130.35	0	0	0
mrr	97.79	21.68	0.22	111.34	118.02	92.02	0	0	69.78	mrr	118.96	25.35	0.21	36.55	115.97	145.67	0	0	95.23
metG	388.41	62.98	0.16	440.96	401.24	429.45	0	282.33	388.08	metG	181.38	70.18	0.39	140.07	212.25	263.1	0	83.2	208.27
dksA	192.61	45.62	0.24	130.02	201.66	199.26	0	0	239.52	dksA	136.09	57.43	0.42	54.44	148.39	189.09	0	0	152.43
tgt	111.97	28.07	0.25	81.47	136.74	46.76	0	0	117.69	tgt	122.51	26.66	0.22	34.43	116.55	151.65	0	0	99.34
ypfH	107.44	31.22	0.29	121.33	86.27	144.66	0	0	77.49	ypfH	126.63	24.39	0.19	39.45	129.37	149.54	0	0	100.99
elaA	132.41	35.41	0.27	143.07	147.16	159.1	0	0	80.28	elaA	146.26	43.64	0.3	93.72	166.21	194.37	0	0	130.73
glyQ	161.5	32.95	0.2	178.03	192.75	158.43	0	0	116.81	glyQ	149.85	63.11	0.42	61.19	150.44	183.62	0	0	204.14
pepN	153.44	0	0	153.44	0	0	0	0	0	pepN	76.26	0	0	76.26	0	0	0	0	0
yfaY	174.12	35.43	0.2	219.46	166.85	176.67	0	0	133.5	yfaY	160.53	57.81	0.36	78.51	169.36	180.63	0	0	213.61
yejL	581.44	104.82	0.18	706.66	631.49	476.02	0	468.37	624.65	yejL	250.68	88.67	0.35	192.54	282.5	323.88	0	125.75	328.73
proS	202.89	37.82	0.19	182.48	246.54	179.66	0	0	0	proS	155.83	68.51	0.44	80.54	172.44	214.51	0	0	0
hupB	920.7	141.04	0.15	1015.97	1002.31	675.55	0	981.34	928.35	hupB	281.45	93.39	0.33	156.94	329.71	363.93	0	206.82	349.86
ypfJ	164.92	21.07	0.13	189.63	174.21	153.28	0	0	142.58	ypfJ	157.1	60.37	0.38	71.81	206.8	191.57	0	0	158.21
ppiB	187.28	42.73	0.23	220.47	192.59	178.88	0	119.07	225.38	ppiB	151.71	68.84	0.45	63.07	133.68	191.91	0	43.24	218.19
trmA	187.06	72.6	0.39	137.28	137.97	291.45	0	0	181.53	trmA	132.07	24.92	0.19	45.13	119.92	160.73	0	0	115.55
gpt	305.25	0	0	305.25	0	0	0	0	0	gpt	60.88	0	0	60.88	0	0	0	0	0
elaB	151.69	59.79	0.39	141.21	97.84	216.04	0	35.33	24.07	elaB	246.15	69.78	0.28	268.11	347.7	280.22	201.65	144.78	234.46
btuB	133.28	64.48	0.48	76.34	143.57	220.01	0	0	93.21	btuB	128.46	38.97	0.3	36.72	130.43	166.41	0	0	88.54
asnS	997.88	87.41	0.09	1142.47	986.68	906.68	0	964.07	989.49	asnS	667.43	94.83	0.14	616.85	647.24	717.41	0	554.76	800.88
dnaX	226.04	62.18	0.28	238.22	281.23	158.67	0	0	0	dnaX	149.6	53.99	0.36	90.94	160.64	197.21	0	0	0
hda	264.73	88.84	0.34	349.51	265.71	269.66	0	118.77	320.01	hda	158	68.53	0.43	118.73	160.85	229.95	0	64.64	215.8
ligT	180.41	21.9	0.12	164.37	187.65	208.17	0	0	161.47	ligT	132.8	41.77	0.31	83.92	164.51	170.47	0	0	112.3
ycgF	144.76	46.67	0.32	121.26	213.09	134.8	0	0	109.91	ycgF	136.23	8.95	0.07	48.37	132.12	146.49	0	0	130.08
thiI	86.44	0	0	86.44	0	0	0	0	0	thiI	NaN	NaN	NaN	37.16	0	0	0	0	0
yfbU	91.99	11.99	0.13	98.96	105.28	81.26	0	0	82.46	yfbU	133.24	12.76	0.1	47.08	142.54	138.47	0	0	118.7
ypjA	81.6	24.84	0.3	50.89	109.26	91.44	0	0	74.82	ypjA	117.53	42.09	0.36	27.28	110.42	162.72	0	0	79.45
mfd	208.56	105.56	0.51	290.99	280.06	129.72	0	62.33	279.7	mfd	197.24	52.24	0.26	129.55	183.74	229.9	0	45.89	245.77
rluC	186.96	17.43	0.09	165.76	204.55	180.22	0	0	197.3	rluC	130.09	50.31	0.39	57.62	140.83	173.61	0	0	148.3
yfgB	132.68	10.45	0.08	133.25	126.11	124.15	0	0	147.21	yfgB	136.71	22.5	0.16	38.95	143.91	154.73	0	0	111.49
yajB	86.9	32.31	0.37	74.97	128.76	91.8	0	0	52.07	yajB	113.7	41.7	0.37	59.24	143.95	148.64	0	0	102.98
yniC	96.25	29.6	0.31	84.85	128.67	60.97	0	0	110.5	yniC	113.21	15.84	0.14	39.71	115.18	127.97	0	0	96.47
sbcB	105.75	0	0	105.75	0	0	0	0	0	sbcB	NaN	NaN	NaN	39.43	0	0	0	0	0
yfcD	272.55	81.62	0.3	405.28	206.53	250.05	0	210.52	290.37	yfcD	179.35	70.48	0.39	126.24	209.47	217.37	0	86.44	257.21
pinH	92.89	28.92	0.31	55.24	124.36	102.44	0	0	89.51	pinH	130.77	28.88	0.22	45.14	132.79	158.58	0	0	100.93
pheM	526.58	213.26	0.4	696.77	586.03	292.47	0	311.33	746.29	pheM	287.21	195.94	0.68	161.66	271.07	260.16	0	124.01	619.15
cca	121.47	14.82	0.12	123.58	141.62	110.09	0	0	110.57	cca	124.15	47.9	0.39	56.36	133.5	169.05	0	0	137.68
iscS	79.04	12.94	0.16	30.53	88.19	0	0	0	69.89	iscS	112.28	38.79	0.35	41.55	111.21	151.59	0	0	74.04
ybfF	128.53	27.29	0.21	25.62	109.23	147.83	0	0	0	ybfF	125.6	18.16	0.14	38.65	112.76	138.44	0	0	0
nudG	102.04	36.98	0.36	62.03	134.96	46.89	0	0	109.11	nudG	111.58	20.9	0.19	36.89	119.78	127.13	0	0	87.83
xseA	306.53	108.97	0.36	383.58	0	229.48	0	0	0	xseA	158.49	46.02	0.29	125.95	0	191.04	0	0	0
yfcE	124.58	21.58	0.17	110.78	155.42	108.61	0	0	123.5	yfcE	147.45	21.55	0.15	46.6	161.18	158.56	0	0	122.61
yqaB	123.92	35.95	0.29	73.72	158.81	128.17	0	0	134.99	yqaB	136.02	27.41	0.2	41.02	124.78	167.26	0	0	116.01
selD	137.32	25.43	0.19	135.7	156.81	101.95	0	0	154.82	selD	138.56	16.79	0.12	49.78	145.55	150.72	0	0	119.39
hupA	180.87	34.5	0.19	145	202.4	217.35	0	0	158.73	hupA	123.85	43.28	0.35	63.89	127.54	166.6	0	0	137.38
iscR	248.54	183.49	0.74	114.79	207.03	188.79	0	161.26	570.83	iscR	192.11	56.25	0.29	114.38	177.76	267.87	0	183.9	216.62
yccF	168.7	23.7	0.14	153.18	203.6	163.35	0	0	154.66	yccF	114.34	40.76	0.36	66.42	137.18	157.3	0	0	96.46
yeaL	116.27	10.85	0.09	16.45	120.93	124	0	0	103.86	yeaL	112.14	28.22	0.25	42.74	118.11	136.9	0	0	81.42
yhiR	NaN	NaN	NaN	49.48	0	0	0	0	0	yhiR	NaN	NaN	NaN	46.4	0	0	0	0	0
yfcI	79.76	15.23	0.19	88.55	74.06	95.27	0	0	61.18	yfcI	119.11	18.59	0.16	32.27	122.94	135.48	0	0	98.9
ygaD	123.6	40.73	0.33	71.64	119.41	170.15	0	0	133.21	ygaD	136.43	28.29	0.21	36.38	130.18	167.33	0	0	111.79
hisS	215.23	60.44	0.28	137.53	198.74	252.02	0	0	272.63	hisS	144.21	61.33	0.43	60.07	146.34	164.73	0	0	205.69
U139	NaN	NaN	NaN	0	0	0	0	0	0	U139	NaN	NaN	NaN	0	0	0	0	0	0
yfjL	117.4	61.44	0.52	68.26	97.64	186.28	0	0	0	yfjL	144	11.85	0.08	44.69	135.62	152.38	0	0	0
yecM	164.28	22.2	0.14	153.02	170.79	192.13	0	0	141.18	yecM	143.87	40.74	0.28	93.65	154.33	191.65	0	0	135.83
wrbA	NaN	NaN	NaN	0	0	0	0	0	0	wrbA	NaN	NaN	NaN	0	0	0	0	0	0
malS	NaN	NaN	NaN	35.62	0	0	0	0	0	malS	NaN	NaN	NaN	34.55	0	0	0	0	0
dedA	83.02	10.06	0.12	77.01	97.99	77.27	0	0	79.83	dedA	110.34	39.47	0.36	54.63	142.21	133.88	0	0	110.66
ygcB	112.7	15.65	0.14	0	101.63	123.77	0	0	0	ygcB	143.7	9.1	0.06	0	137.27	150.13	0	0	0
alaS	258.4	19.82	0.08	238.37	278.01	258.81	0	0	0	alaS	138.92	68.1	0.49	61.33	166.66	188.78	0	0	0
dkgB	84.77	15.01	0.18	37.1	97	89.28	0	0	68.03	dkgB	113.55	38.62	0.34	34.16	108.15	154.59	0	0	77.91
ydaQ	105.02	22.07	0.21	75.12	104.73	127.58	0	0	112.65	ydaQ	128.39	24.25	0.19	43.27	120.54	155.6	0	0	109.04
mrp	305.41	31.93	0.1	260.73	304.03	328.65	0	0	328.23	mrp	181.83	47.68	0.26	125.89	160.07	210.69	0	0	230.67
yeaP	332.35	86.29	0.26	397.31	393.06	283.71	0	202.87	384.77	yeaP	167.6	81.69	0.49	119.92	181.92	226.19	0	53.83	256.12
yicC	103.68	0	0	103.68	0	0	0	0	0	yicC	NaN	NaN	NaN	45.22	0	0	0	0	0
yfeA	198.55	208.74	1.05	511.38	96.04	103.93	0	0	82.84	yfeA	123.56	10.34	0.08	126.88	120.33	135.76	0	0	111.28
Empty	NaN	NaN	NaN	0	0	0	0	0	0	Empty	NaN	NaN	NaN	0	0	0	0	0	0
selA	90.17	26.64	0.3	61.74	119.62	74.61	0	0	104.7	selA	125.94	29.04	0.23	43.52	131.14	152.04	0	0	94.65
yfeY	184.31	74.46	0.4	221.52	226.38	72.79	0	0	216.57	yfeY	172.63	48.54	0.28	116.21	185.81	231.52	0	0	156.97
yohC	120.22	44.01	0.37	46.27	116.23	166.09	0	0	78.33	yohC	161.58	60.52	0.37	75.29	174.13	216.72	0	0	180.16
yejK	155.54	22.87	0.15	129.01	150.45	184.37	0	0	158.32	yejK	118.07	40.48	0.34	61.16	133.29	155.89	0	0	121.97
yoaB	155.47	28.38	0.18	115.97	169.68	181.06	0	0	155.16	yoaB	114.32	44.77	0.39	53.59	114.8	160.43	0	0	128.44
pepQ	119.49	0	0	119.49	0	0	0	0	0	pepQ	54.49	0	0	54.49	0	0	0	0	0
ypjB	67.72	8.07	0.12	62.43	63.72	77.01	0	0	46.32	ypjB	111.78	16.22	0.15	36.41	108.36	129.44	0	0	97.55
yfjN	96.29	41.33	0.43	100.15	152.46	74.99	20.96	0	57.56	yfjN	95.53	24	0.25	78.61	89.28	130.93	26.76	0	83.3
ygeI	91.43	27.5	0.3	98.51	109.85	106.55	3.61	0	50.8	ygeI	99.71	36.7	0.37	86.52	129.26	146.53	59.39	0	76.86
osmB	83.66	31.46	0.38	51.49	85.15	114.34	0	0	32.43	osmB	116.38	33.73	0.29	109.58	112.95	162.13	0	14.25	80.85
ynfC	114.66	0	0	12.85	114.66	45.7	0	0	29.81	ynfC	83.55	25.51	0.31	67.16	86.74	118.32	0	0	62
ftsJ	113.54	38.46	0.34	79.72	173.85	80.81	111.91	38.76	121.43	ftsJ	120.22	44.06	0.37	117.75	137.73	188.29	63.83	82.12	131.57
ecfE	109.37	0	0	1.21	109.37	33.41	31.26	0	33.57	ecfE	80.71	22.98	0.28	67.79	88.87	108.96	30.49	0	57.21
yadR	370.61	100.65	0.27	257.92	406.6	469.4	230.65	416.15	442.96	yadR	93.93	31.16	0.33	63.79	91.38	140.28	45.02	68.03	106.18
lacZ	NaN	NaN	NaN	0	0	0	0	0	0	lacZ	NaN	NaN	NaN	0	0	0	0	0	0
tilS	81.06	3.6	0.04	12.1	78.51	83.61	0	0	0	tilS	77.71	15.87	0.2	39.69	66.48	88.93	0	0	0
idi	79.87	18.96	0.24	66.46	93.28	31.35	0	25.26	49.64	idi	107.78	53.57	0.5	94.07	120.96	193.97	0	61.72	68.18
hslJ	91.72	22.82	0.25	27.44	107.85	0	75.58	0	46.71	hslJ	85.83	8.63	0.1	80.8	86.97	100.05	83.45	0	77.86
ydgC	70.73	27.73	0.39	0	90.34	39.93	0	0	51.13	ydgC	79.41	20.28	0.26	0	65.07	93.76	0	0	35.68
ftsY	141.62	33	0.23	119.24	194.28	135.23	134.46	102.12	164.41	ftsY	109.64	44.85	0.41	103.19	153.77	151.82	59.46	54	135.62
yaiW	97.63	19.3	0.2	3.05	83.98	111.28	0	0	28.7	yaiW	96.8	25.87	0.27	79.6	107.84	127.9	0	0	71.84
ybaB	63.07	0	0	0.87	63.07	46.28	0	0	24.55	ybaB	79.99	13.54	0.17	45.23	70.42	89.56	0	0	29.78
mraZ	62.31	4.32	0.07	3	59.25	65.37	36.13	0	48.24	mraZ	91.23	7.71	0.08	48.91	85.79	96.68	21.64	0	42.25
tig	369.73	128.09	0.35	436.18	334.76	542.7	199.81	335.19	0	tig	125.83	64.97	0.52	101.67	110.28	220.01	40.1	71.35	0
ydfA	79.04	28.01	0.35	17.41	98.84	32.28	0	0	59.23	ydfA	81.03	3.62	0.04	41.52	84.23	77.11	34.22	0	81.76
serA	NaN	NaN	NaN	0	0	0	0	0	0	serA	NaN	NaN	NaN	0	0	0	0	0	0
ydhH	99.06	0	0	39.21	99.06	39.43	0	0	15.8	ydhH	75.96	19.88	0.26	67.62	87.84	96.2	0	0	52.2
uspB	136.17	62.29	0.46	133.7	182.82	231.5	77.75	122.41	68.85	uspB	222.74	52.14	0.23	189.79	237.74	226.49	194	171.66	316.74
U66	NaN	NaN	NaN	0	0	0	0	0	0	U66	NaN	NaN	NaN	0	0	0	0	0	0
ybaA	NaN	NaN	NaN	3	35.63	0	0	0	16.95	ybaA	80.52	25.78	0.32	48.19	84.16	104.28	0	0	53.12
ybaN	135.81	24.63	0.18	0	173.8	127.47	109.89	123.08	144.78	ybaN	114.17	34.49	0.3	0	130.82	162.84	71.44	98.96	106.8
dicB	54.56	0	0	3	54.56	35.56	0	0	14.58	dicB	88.97	22.95	0.26	34.38	72.74	105.2	0	0	24.81
creB	81.52	0.28	0	19.07	81.72	81.32	0	0	21.6	creB	74.49	23.07	0.31	52.1	73.18	98.19	0	0	31.68
otsB	103.65	29.26	0.28	46.85	124.33	82.96	0.31	42.29	31.26	otsB	117.77	32.85	0.28	125.59	119.02	163.78	72.6	46.57	107.89
ydhD	136.05	41.42	0.3	145.02	189.45	176.2	95.21	89.98	120.42	ydhD	109.05	42.21	0.39	109.69	139.67	163.87	63.84	56.33	120.91
yfjM	67.61	0	0	0	37.1	67.61	0	0	40.26	yfjM	95.89	10.91	0.11	0	88.18	103.6	0	0	46.54
ecfK	62.02	8.58	0.14	3	59.91	71.46	0	0	54.69	ecfK	91.81	20.13	0.22	34.34	77.57	106.04	0	0	37.17
cdaR	70.66	0.7	0.01	3	70.17	71.15	0	0	35.07	cdaR	92.62	14.85	0.16	40.86	82.12	103.12	0	0	48.04
yagJ	74.08	21.5	0.29	96.35	53.44	72.45	0	0	0	yagJ	86.62	19.57	0.23	41.27	72.77	100.46	0	0	0
proX	NaN	NaN	NaN	3	0	0	0	0	0	proX	91.31	0	0	49.24	0	91.31	0	0	22.26
yeaS	201.93	84.31	0.42	202.85	251.63	226.6	58.18	0	270.37	yeaS	132.39	23.77	0.18	116.84	152.26	107.33	31.4	0	153.14
nlpI	102.79	50.02	0.49	60.14	174.16	78.94	33.61	0	97.91	nlpI	98.53	10.7	0.11	83.01	105.87	105.37	34.86	0	99.88
yjjJ	137.56	34.46	0.25	142.68	161.76	178.34	105.39	0	99.61	yjjJ	146.36	51.77	0.35	112.25	157.53	177.65	77.31	0	207.07
envY	83.78	4.21	0.05	0	86.76	80.8	0	0	21.38	envY	93.35	25.71	0.28	0	93.69	118.89	0	0	67.47
trkA	60.57	6.35	0.1	5.44	67.43	54.89	0	0	59.41	trkA	98.77	23.59	0.24	70.09	116.23	119.88	0	0	88.9
adrA	91.53	38.6	0.42	3	64.24	118.82	0	0	0	adrA	85.38	11.87	0.14	41.99	76.99	93.78	0	0	15.96
ychH	81.57	10.83	0.13	69.74	81.12	79.44	0	0	95.98	ychH	96.27	30.88	0.32	50.02	109.69	111.47	0	0	113.88
cspA	1077.09	253.19	0.24	1223.29	0	1223.23	0	0	784.73	cspA	295.16	59.58	0.2	337.05	0	321.47	0	0	226.95
yeaZ	294.26	75.35	0.26	318.68	333.38	332.03	204.9	196.68	379.87	yeaZ	132.13	31.73	0.24	130.66	136.57	160.79	79.68	46.25	152.92
yjjV	73.58	0	0	3	73.58	0	0	0	1.53	yjjV	94.12	29.55	0.31	49.88	73.22	115.01	0	0	34.16
imp	92.84	39.59	0.43	58.87	130.25	123.84	0	0	58.38	imp	108.68	31.63	0.29	78.05	106.77	141.23	0	0	43.97
dhaM	146.17	46.52	0.32	137.35	228.45	47.98	119.79	123.82	121.43	dhaM	141.04	53.17	0.38	152.07	160.59	182.56	75.45	76.21	199.38
yahI	75.19	0	0	0	75.19	29.98	0	0	7.06	yahI	78.47	16.79	0.21	59.4	84.97	91.05	0	0	29.38
ppiD	216.41	27.92	0.13	208.34	234.75	239.99	172.51	199.51	243.38	ppiD	126.31	47.07	0.37	96.78	131.98	157.13	48.45	63.73	181.91
yfbE	99	44.25	0.45	0	67.71	130.29	0	0	34.6	yfbE	101.38	15.3	0.15	0	90.56	112.2	0	0	42.24
b2680	107.85	0	0	0.11	107.85	40.49	0	0	34.13	b2680	72.19	20.9	0.29	56.83	63.75	95.99	0	0	35.31
yobF	491.9	115.02	0.23	549.76	652.13	429.34	363.27	568.72	388.16	yobF	313.56	65.09	0.21	272.93	328.09	400.62	235.1	270.21	374.43
ibpB	67.41	13.95	0.21	3	57.55	77.27	0	0	0.96	ibpB	82.9	16.66	0.2	47.24	71.12	94.68	0	0	17.81
crcB	100.56	38.31	0.38	73.72	158.38	121.13	69.56	0	80.01	crcB	115.55	13.32	0.12	101.17	128.86	124.67	48.86	0	107.48
speF	77.98	11.08	0.14	1.15	70.14	85.81	0	0	12.72	speF	71.64	17.3	0.24	61.48	61.82	91.61	0	0	29.2
b0298	83.23	0	0	3.84	0	83.23	0	0	10.41	b0298	87.84	0	0	46.39	0	87.84	0	0	32.09
ybaV	56.18	0	0	3	56.18	35.27	0	0	32.72	ybaV	90.45	18.19	0.2	42.45	77.58	103.31	0	0	35.57
eco	90.05	12.62	0.14	0	81.12	98.98	41.94	0	0	eco	98.3	16.05	0.16	0	86.95	109.65	30.74	0	0
ygaZ	195.94	54.58	0.28	202.25	258.98	232.01	120.37	0	166.08	ygaZ	114.97	34.01	0.3	109.63	127.75	127.85	59.74	0	149.88
yebO	191.03	49.63	0.26	154.18	171.27	264.26	0	0	174.39	yebO	77.23	16.7	0.22	73.01	83.56	95.88	0	0	56.47
ftsN	179.66	5.96	0.03	181.23	184.68	27.48	0	0	173.08	ftsN	105.63	22.52	0.21	82.09	91.56	129.97	0	0	118.92
cspB	69.39	0	0	0	69.39	42.43	0	0	24.3	cspB	86.88	9.18	0.11	0	80.39	93.37	0	0	30.67
ykgF	61.95	10.78	0.17	0.2	69.57	54.33	0	0	33.16	ykgF	86.35	24.08	0.28	59.77	92.53	106.73	0	0	36.47
ybbC	50.27	0	0	0.01	0	50.27	0	0	37.78	ybbC	82.8	28.91	0.35	62.36	0	103.24	0	0	35.08
yafM	71.69	0	0	2.1	71.69	48.79	0	0	31.36	yafM	81.29	14.28	0.18	66.87	81.56	95.43	0	0	35.8
polA	124.43	34.1	0.27	0	108.98	163.52	26.46	0	100.78	polA	92.88	12.77	0.14	0	101.3	99.17	19.24	0	78.19
ygdR	82.11	38.65	0.47	1.74	109.44	0	0	0	54.78	ygdR	71.01	10.52	0.15	70.66	81.7	0	0	0	60.67
yebE	73.64	30.41	0.41	52.14	95.15	0	0	0	34.97	yebE	90.18	7.09	0.08	48.61	85.17	95.2	0	0	34.88
cutA	112.92	27.78	0.25	45.6	116.28	138.86	0	0	83.61	cutA	100.06	22.88	0.23	79.18	84.52	128.99	0	0	107.53
agaS	62.04	0	0	3	62.04	14.38	0	0	1.21	agaS	78.94	25.04	0.32	49.81	61.24	96.64	0	0	26.78
yajC	120.75	30.6	0.25	0	99.12	142.39	0	0	43.86	yajC	99.93	30.93	0.31	0	78.05	121.8	0	0	48.16
b0501	132.77	95.13	0.72	0.32	0	200.04	0	0	65.51	b0501	84.19	19.98	0.24	70.06	0	98.32	0	0	46.69
uxuR	188.84	57.84	0.31	152.74	250.12	234.26	114.89	145.08	235.97	uxuR	145.96	54.4	0.37	164.71	127.76	186.97	100.07	76.3	219.94
treF	66.5	6.28	0.09	0	70.93	62.06	26.56	0	46.12	treF	86.62	24.06	0.28	0	92.54	107.17	19.97	0	60.16
yqeH	92.71	53.99	0.58	0	54.53	130.88	0	0	0	yqeH	78.27	20.68	0.26	66.52	66.15	102.15	0	0	0
dacA	166.78	34.26	0.21	172.45	212.75	145.69	0	0	136.26	dacA	95	13.58	0.14	90.68	102.53	108.77	0	0	78.01
U139	NaN	NaN	NaN	0	0	0	0	0	0	U139	NaN	NaN	NaN	0	0	0	0	0	0
inaA	86.8	32.77	0.38	56.35	0	82.58	0	0	121.48	inaA	108.84	18.85	0.17	89.74	0	127.42	0	0	109.35
ybaT	67.86	0	0	0	67.86	31.45	0	0	25.34	ybaT	84.73	22.55	0.27	0	94.31	100.9	0	0	58.97
wrbA	NaN	NaN	NaN	0	0	0	0	0	0	wrbA	NaN	NaN	NaN	0	0	0	0	0	0
ykiA	67.29	0	0	0.72	67.29	42.89	0	0	8.2	ykiA	92.72	16.92	0.18	39.1	80.76	104.69	0	0	30.94
yhgE	84.37	10.31	0.12	0	80.81	95.98	0	0	76.3	yhgE	75.55	23.51	0.31	0	61.32	102.69	0	0	62.64
ygeG	NaN	NaN	NaN	3	0	0	0	0	0	ygeG	NaN	NaN	NaN	38.74	0	0	0	0	0
htpX	181.8	73.2	0.4	170.57	204.88	145.61	0	96.06	291.85	htpX	168.54	111.25	0.66	69.14	135.01	142.03	0	25.33	327.99
mdoB	157.3	54.48	0.35	234.17	157.55	121.98	0	0	115.5	mdoB	80.97	30.31	0.37	58.28	69.24	115.4	0	0	49.56
pdxB	177.31	63.6	0.36	187.72	230.38	222.75	71.57	0	174.12	pdxB	121.6	21.97	0.18	97.79	117.97	151	47.28	0	119.63
yafN	78.78	5.05	0.06	0	75.22	82.35	0	0	31.56	yafN	96.96	19.32	0.2	0	83.3	110.62	0	0	44.68
yaiE	197.73	54.65	0.28	179.72	226.98	291.98	170.81	181.46	135.44	yaiE	251.19	45.78	0.18	269.73	282.26	311.75	208.33	191.07	244.02
ykfJ	91.84	7.12	0.08	96.6	83.65	95.26	0	0	20.53	ykfJ	87.84	15.46	0.18	34.06	76.91	98.77	0	0	41.36
yaaW	108.75	80.11	0.74	0	52.1	165.4	0	0	31.68	yaaW	76.95	17.43	0.23	0	64.62	89.27	0	0	30.58
Empty	NaN	NaN	NaN	0	0	0	0	0	0	Empty	NaN	NaN	NaN	0	0	0	0	0	0
treA	75.81	3.55	0.05	6.06	73.3	78.32	0	0	5.84	treA	79.68	19.09	0.24	49.46	66.18	93.18	0	0	43.83
ynfA	59.33	12.41	0.21	0.07	68.11	45.81	0	0	50.55	ynfA	82.22	29.5	0.36	61.43	69.25	115.99	0	0	38.92
nudF	129.09	25.7	0.2	115.3	166.66	144.9	38.9	107.58	110.99	nudF	136.97	51.32	0.37	160.72	151.28	197.01	44.25	61.95	113.88
yjaH	95.19	47.07	0.49	0	61.91	128.47	0	0	23.48	yjaH	74.23	28.91	0.39	56.26	58.86	107.58	0	0	29.1
paaX	106.36	0	0	24.62	106.36	0	23.35	0	49.9	paaX	108.36	10.24	0.09	96.19	104.27	119.47	39.12	0	113.52
yahM	908.38	502.47	0.55	1886.94	822.53	459.76	890.89	645.85	744.29	yahM	568.08	217.74	0.38	537.72	668.2	563.53	320.24	387.39	931.42
priC	NaN	NaN	NaN	0	0	0	0	0	0	priC	NaN	NaN	NaN	0	0	0	0	0	0
insA_3	196.27	36.26	0.18	210.11	219.39	159.18	146.59	240.73	201.64	insA_3	78.45	20.09	0.26	60.05	68.47	83.87	57.32	92.33	108.64
yadK	56.22	0	0	16.98	56.22	1.89	37.78	39.21	5.98	yadK	50.39	0	0	16.06	50.39	15.7	34.24	36.26	34.51
yafV	103.61	36.67	0.35	110.79	142.9	85.91	72.73	148.59	60.74	yafV	121.18	25.12	0.21	123.98	134.43	98.76	97.39	109.36	163.16
ybgI	468.16	117.4	0.25	642.56	565.56	364.01	460.35	439.81	336.65	ybgI	325.87	40.36	0.12	356.13	293.23	330.3	309.29	279.46	386.81
mutS	52.05	0	0	15.27	40.95	11.28	6.51	16.67	52.05	mutS	NaN	NaN	NaN	22.29	30.89	27.83	33.45	43.18	30.68
ada	83.58	18.81	0.23	56.68	99.09	0	93.34	85.2	42.34	ada	93.67	15.6	0.17	114.87	102.13	73.58	84.12	83.64	103.7
yagY	NaN	NaN	NaN	7.59	28.91	0	8.72	2.55	0	yagY	NaN	NaN	NaN	13.8	28.02	0	12.71	24.89	15.95
lacZ	NaN	NaN	NaN	0	0	0	0	0	0	lacZ	NaN	NaN	NaN	0	0	0	0	0	0
ascG	92.11	12.39	0.13	0	102.53	0	76.43	101.52	87.96	ascG	61.94	13.5	0.22	0	55.2	0	56.95	53.52	82.07
cpdA	NaN	NaN	NaN	0	18.87	0	0	0	0	cpdA	NaN	NaN	NaN	0	29.85	0	0	25.6	0
cytR	331.02	40.49	0.12	269.29	359.87	335.61	293.81	362.38	365.17	cytR	205.08	44.44	0.22	150.1	206.73	216.99	170.35	207.13	279.21
lit	NaN	NaN	NaN	0	41.71	0	0	2.53	4.15	lit	NaN	NaN	NaN	0	42.1	0	0	10.77	6.03
mutH	NaN	NaN	NaN	12.55	44.59	0	0	5.52	0	mutH	NaN	NaN	NaN	33.82	35.84	0	0	29.68	0
ygiS	NaN	NaN	NaN	0	28.81	0	0	0	0	ygiS	NaN	NaN	NaN	0	21.1	0	0	20.71	20.15
yagZ	NaN	NaN	NaN	0	26.49	0	0.82	0	13.61	yagZ	NaN	NaN	NaN	0	36.52	0	5.45	15.53	18.24
recN	NaN	NaN	NaN	0	47.06	17.95	22.44	11.28	25.23	recN	NaN	NaN	NaN	0	36.18	31.76	11.71	23.78	34.91
pth	88.14	23.62	0.27	0	95.61	79.44	47.09	60.99	116.52	pth	64.44	0	0	0	43.44	31.81	19.37	40.17	64.44
yacG	68.4	0	0	8.51	68.4	0	18.57	45.37	11.78	yacG	60.97	0	0	25.93	45.4	0	22.05	34.71	60.97
serA	NaN	NaN	NaN	0	0	0	0	0	0	serA	NaN	NaN	NaN	0	0	0	0	0	0
ycgJ	98.13	42.41	0.43	61.87	136.93	0	60.27	149.83	81.73	ycgJ	74.77	14.47	0.19	70.07	88.39	30.42	46.11	56.52	84.13
mutY	131.08	36.69	0.28	155.98	156.38	65.33	110.98	156.2	141.61	mutY	60.86	10.04	0.16	42.23	53.76	49.3	43	45.73	67.96
U66	NaN	NaN	NaN	0	0	0	0	0	0	U66	NaN	NaN	NaN	0	0	0	0	0	0
ykgI	68.11	3.15	0.05	45.65	68.22	71.2	27.42	64.91	32.07	ykgI	71.61	14.15	0.2	45.03	81.18	49.53	58.19	86.22	60.84
ilvD	NaN	NaN	NaN	0	34.78	0	11.42	0.37	38.31	ilvD	NaN	NaN	NaN	0	43.91	0	0.82	18.57	32.55
ais	NaN	NaN	NaN	0	20.91	0	6.13	20.63	32.36	ais	NaN	NaN	NaN	0	19.8	0	26.24	24.88	21.59
trmU	788.09	130	0.16	778.16	832.49	874.91	536.34	814.6	892.06	trmU	208.96	85.62	0.41	201.75	158.11	180.41	112.19	241.41	359.89
yrbA	145.75	36.23	0.25	115.9	186.83	96.92	136.42	183.57	154.88	yrbA	60.51	4.8	0.08	54.43	58.4	59.86	33.21	62.58	67.28
ycgL	83.14	16.14	0.19	42.95	100.28	95.5	59.85	75.91	84.14	ycgL	59.86	9.07	0.15	26.38	66.22	52.49	51.66	39.56	69.06
ileX	475.51	254.65	0.54	831.62	547.77	125.65	363.31	324.08	660.63	ileX	114.78	92.51	0.81	48.83	70.14	30.34	35.57	53.05	221.14
dam	NaN	NaN	NaN	0	3.11	0	0.25	25.26	16.98	dam	NaN	NaN	NaN	0	31.8	0	1.7	28.95	33.77
b0309	50.43	0	0	0	50.43	0	28.92	25.05	39.98	b0309	NaN	NaN	NaN	0	40.97	0	6.52	36.68	21.05
rmuC	65.52	5.05	0.08	0	69.09	11.53	23.72	48.97	61.95	rmuC	50.58	0	0	0	48.86	4.02	0.69	19.87	50.58
b1420	66.39	0	0	45.89	40.71	0	35.28	66.39	31.4	b1420	NaN	NaN	NaN	11	34.85	28.17	27.57	34.06	40.62
yadS	NaN	NaN	NaN	0	42.7	0	0	0	14.89	yadS	NaN	NaN	NaN	0	35.17	0	0	11.24	22.67
ydeP	NaN	NaN	NaN	0	39.97	0	0	6.26	6.3	ydeP	59.9	0	0	0	59.9	0	0	32.34	30.9
ydbH	NaN	NaN	NaN	0	0	0	0	26.21	41.68	ydbH	NaN	NaN	NaN	0	0	0	0	34.16	34.2
creA	NaN	NaN	NaN	0	43.21	0	0	0	0	creA	NaN	NaN	NaN	0	46.12	0	0	28.02	0
gadX	1225.61	587.29	0.48	2390.65	932.88	861.88	1171.75	1144.79	851.72	gadX	1684.74	525.35	0.31	2607.03	1762.21	1424.88	1399.11	1089.47	1825.73
yafK	771.09	138.84	0.18	694.8	716.95	852.56	696.38	1016.99	648.86	yafK	346.81	59.08	0.17	293.8	343.39	306.69	297.73	421.25	418
yaiA	72.51	0	0	72.51	0	0	17.46	32.44	19.38	yaiA	71.41	0	0	28.54	0	0	28.68	31.13	71.41
yjiY	76.47	0	0	0	45.49	0	12.04	19.6	76.47	yjiY	NaN	NaN	NaN	0	26.77	0	10.89	29.75	43.45
xylB	NaN	NaN	NaN	0	37.59	0	0	28.47	17.18	xylB	NaN	NaN	NaN	0	34.24	0	0	23.33	23.15
ompN	NaN	NaN	NaN	0	33.75	0	0	0	2.01	ompN	NaN	NaN	NaN	0	31.03	0	0	0	13.24
nhoA	51.64	0	0	0	51.64	0	0	23.58	30.94	nhoA	NaN	NaN	NaN	0	48.86	0	0	24.64	34.01
yccR	53.15	0	0	0	53.15	0	33.71	0.58	9.57	yccR	60.98	10	0.16	0	68.06	0	33.28	31.68	53.91
mutM	57.17	0	0	0.75	57.17	0	15.5	20.05	33.88	mutM	NaN	NaN	NaN	26.22	38.69	0	18.93	18.54	38.05
mutT	75.02	0	0	0	30.39	0	19.69	0	75.02	mutT	NaN	NaN	NaN	0	36.48	0	4.4	22.59	20.18
aidB	58.71	0	0	35.91	46.16	58.71	36.17	15.58	31.8	aidB	121.39	32.9	0.27	123.35	164.32	91.09	92.91	98.87	157.83
napF	106	18.44	0.17	0	117.57	0	44.75	84.74	115.7	napF	78.38	36.04	0.46	0	32.6	0	20.51	52.9	103.86
yggD	172.13	38.46	0.22	193.31	204.6	129.17	117.39	187.76	200.57	yggD	83.56	13.63	0.16	72.65	83.82	73.63	75.81	86.53	108.91
yafU	NaN	NaN	NaN	0	0	0	0	0	0.73	yafU	NaN	NaN	NaN	0	0	0	0	0	0
ydeJ	NaN	NaN	NaN	0	22.94	0	0	0	6.66	ydeJ	NaN	NaN	NaN	0	42.84	0	0	49.09	30.17
ecpD	104.35	0	0	104.35	0	0	0	0	0	ecpD	NaN	NaN	NaN	29.34	27.2	0	0	27.83	0
xylE	NaN	NaN	NaN	0	0	0	0	0	0	xylE	NaN	NaN	NaN	0	34.37	0	0	0	0
dinB	NaN	NaN	NaN	0	8.44	0	9.11	24.52	16.49	dinB	NaN	NaN	NaN	0	35.97	0	8.49	18.35	28.75
ybfD	NaN	NaN	NaN	0	0	0	1.34	21.12	21.85	ybfD	NaN	NaN	NaN	0	0	0	6.16	16.72	32.42
dpbA	NaN	NaN	NaN	0	20.2	0	0	0	21.97	dpbA	NaN	NaN	NaN	0	28.77	0	0	0	23.95
ydeO	57.05	9.42	0.17	5.49	63.72	0	46.67	33.52	50.39	ydeO	62.61	4.18	0.07	58.59	61.17	0	46.05	68.45	62.22
ybeB	719.04	215.51	0.3	686.85	627.49	1109.49	469.82	646.69	773.93	ybeB	150.52	57.9	0.38	146.24	98.43	149.08	77.18	220.94	211.26
dinG	98.91	35.78	0.36	125.2	139.47	55.06	58.94	93.21	121.58	dinG	58.68	2.85	0.05	41.64	56.67	14.85	28.84	38.35	60.7
ybfE	243.6	59.93	0.25	225.39	206.52	34.26	180.35	331.47	274.27	ybfE	53.71	5.05	0.09	35.51	50.42	21.15	46.53	51.17	59.53
yjiW	NaN	NaN	NaN	4.4	29.35	0	0	12.17	1.72	yjiW	NaN	NaN	NaN	17.97	30.9	0	0	25.75	30.11
brnQ	200.21	39.4	0.2	203.16	223.89	144.19	165.68	211.95	252.4	brnQ	106.8	47.78	0.45	134.26	116.97	64.93	79.4	61.16	184.06
ybgA	75.18	18.95	0.25	61.77	88.58	49.97	33.88	38.9	29	ybgA	83.57	31.65	0.38	59.74	85.12	42.82	46.36	61.63	127.78
rdoA	86.4	20.93	0.24	23.28	114.19	65.83	29.8	89.57	75.99	rdoA	61.93	12.82	0.21	43.01	52.87	23.1	22.6	31.81	70.99
eutR	NaN	NaN	NaN	0	32.58	0	0	0	18.49	eutR	NaN	NaN	NaN	0	32.89	0	0	19.08	25.02
yafD	362.41	14.75	0.04	352.22	387.74	355.41	0	362.93	353.73	yafD	189.4	62.16	0.33	168.69	156.3	140.83	0	184.35	296.85
xthA	118.63	10.9	0.09	107.58	134.54	121.71	0	120.09	109.25	xthA	51.81	2.45	0.05	23.15	53.54	4.53	0	39.26	50.08
yciG	NaN	NaN	NaN	30.47	39.75	31.19	0	0	2.5	yciG	67.05	5.11	0.08	66.56	70.7	71.11	57.29	69.38	67.27
ykgH	NaN	NaN	NaN	0	0	0	0.65	0	1.88	ykgH	NaN	NaN	NaN	0	28.01	0	10.93	19.74	18.1
ftsK	230.16	56.63	0.25	296.11	288.02	146.22	226.31	229.83	194.45	ftsK	119.77	25.47	0.21	133.79	127.58	97.73	90.66	109.7	159.17
b0725	NaN	NaN	NaN	4.69	0	0	0	0	6.26	b0725	NaN	NaN	NaN	15.71	0	0	2.95	0	26.92
pck	86.51	29.96	0.35	51.44	83.68	0	69.7	130.79	96.93	pck	64.73	0	0	18.91	44.71	0	26	28.21	64.73
yehS	283.86	75.19	0.26	329.02	353.63	160.83	223.12	327.42	309.13	yehS	147.12	47.42	0.32	118.86	161.98	105.28	138.91	122.29	235.39
U139	NaN	NaN	NaN	0	0	0	0	0	0	U139	NaN	NaN	NaN	0	0	0	0	0	0
sppA	72.65	26.72	0.37	0	91.55	0	42.84	35.4	53.76	sppA	NaN	NaN	NaN	0	45.6	0	11.63	22.86	34.05
tyrS	334	41.97	0.13	359.1	362.74	327.86	258.93	373.22	322.13	tyrS	265.86	44.36	0.17	327.43	230.21	225.74	251.65	244.29	315.84
wrbA	NaN	NaN	NaN	0	0	0	0	0	0	wrbA	NaN	NaN	NaN	0	0	0	0	0	0
ydgL	1159.31	444.27	0.38	834.78	780.09	1381.4	682.06	1617.52	1660	ydgL	147.08	65.32	0.44	157.54	82.66	86.84	107.34	221.41	226.7
ybgE	NaN	NaN	NaN	0	18.98	0	0	12.15	9.02	ybgE	NaN	NaN	NaN	0	38.54	0	0.17	13.58	32.12
b0165	NaN	NaN	NaN	0	1.5	0	0	0	0	b0165	NaN	NaN	NaN	0	24.5	0	0	0	0
yihN	83.45	18.44	0.22	69.48	94.21	66.29	47.89	103.81	32.22	yihN	66.72	8.96	0.13	74.51	78.18	54.95	63.5	69.68	59.51
dnaQ	97.56	17.32	0.18	97.81	108	44.96	0	111.38	73.07	dnaQ	70.81	15.43	0.22	62.63	79.55	50.51	0	70.64	90.73
purT	183.08	59.89	0.33	220.67	234.29	0	0	175.98	101.37	purT	NaN	NaN	NaN	15.97	28.29	0	0	38.45	25.27
dcm	82.09	24.28	0.3	73.81	96.42	48.79	52.76	71.89	115.55	dcm	61.81	0	0	36.25	41.44	17.99	17.76	39.99	61.81
yagB	78.29	25.66	0.33	49.16	81.02	0	31.06	102.48	51.37	yagB	56.08	0	0	31.22	46.86	0	21.12	36.22	56.08
sodB	50.07	0	0	50.07	13.2	0	23.38	27.93	25.52	sodB	87	19.35	0.22	45.81	73.32	0	17.77	41.53	100.68
ybgC	381.57	98.14	0.26	477.78	402.43	194.54	429.46	370.84	414.39	ybgC	158.64	31.35	0.2	177.61	137.88	123.14	155	147.39	210.84
Empty	NaN	NaN	NaN	0	0	0	0	0	0	Empty	NaN	NaN	NaN	0	0	0	0	0	0
aldB	NaN	NaN	NaN	0	35.95	0	0	0	6.69	aldB	NaN	NaN	NaN	0	36.68	0	0	0	27.98
yafL	481.03	79.51	0.17	578.71	444.51	500.12	0	367.33	514.46	yafL	160.5	41.9	0.26	144.47	125.13	151.28	0	148.41	233.18
ung	68.85	0	0	0	68.85	0	0	0	32.94	ung	53.06	0	0	0	53.06	0	0	0	43.8
sbmC	55.93	0	0	55.93	36.37	0	12.47	17.88	5.62	sbmC	82.29	19.51	0.24	91.32	102.14	37.92	84.8	50.05	83.16
yagM	NaN	NaN	NaN	0	0	0	0	0	5.23	yagM	NaN	NaN	NaN	0	0	0	0	0	19.2
nfo	53.72	0	0	43	53.72	0	0	35.39	36.38	nfo	NaN	NaN	NaN	21.41	44.4	3.92	8.28	11.39	34.91
ybhL	103.54	34.06	0.33	140.68	120.75	50.29	0	111	94.99	ybhL	92.19	29.6	0.32	103.54	94.04	60.39	0	68.42	134.58
yafC	72.18	8.4	0.12	78.12	66.24	21.15	0	3.82	39.63	yafC	63.59	11.27	0.18	60.96	16.99	62.67	0	78.91	51.82
ybiA	84.5	0	0	84.5	0	15.04	0	4.94	17.64	ybiA	93.01	0	0	41.29	0	8.49	0	93.01	42.07
fur	150.77	25.55	0.17	119.93	150.33	131.43	0	174.74	177.43	fur	80.69	42.79	0.53	50.44	32.19	43.08	0	49.95	110.95
yagU	239.06	100.99	0.42	253.45	241.71	252.9	402.81	190.89	92.59	yagU	213.33	43.64	0.2	220	157.41	235.85	272.46	227.33	166.94
ycjG	62.67	8.58	0.14	70.33	50.4	64.24	0	0	65.73	ycjG	77.5	26.67	0.34	34.22	17.62	41.73	0	96.36	58.65
ygeA	113.95	24	0.21	114.86	117.15	151.61	0	94.3	91.85	ygeA	98.63	18.11	0.18	72.75	41.45	99.5	0	110.6	111.67
trmE	125.2	35.77	0.29	92.63	112.12	134.87	0	182.86	103.54	trmE	79.63	19.54	0.25	67.68	69.83	60.14	0	94.82	105.68
lacZ	NaN	NaN	NaN	0	0	0	0	0	0	lacZ	NaN	NaN	NaN	0	0	0	0	0	0
rnhA	77.61	11.13	0.14	90.06	68.61	27.95	0	14.74	74.17	rnhA	66.81	8.83	0.13	38.78	10.59	28.84	0	73.05	60.56
astC	63.52	0	0	0	63.52	49.04	0	0	30.12	astC	71.08	0	0	0	36.34	36.63	0	71.08	46.2
soxR	NaN	NaN	NaN	3	25.43	24.04	0	25.11	19.16	soxR	64.51	0	0	39.35	11.19	25.42	0	64.51	28.31
yahD	81.29	2.9	0.04	78.8	82.14	79.19	0	85.01	38.9	yahD	64.07	11.91	0.19	74.58	51.13	40.2	0	44.61	66.49
marR	72.92	17.58	0.24	93.22	62.65	62.89	0	0	0	marR	66.4	0	0	31.95	12.67	36.07	0	66.4	0
bacA	62.93	0	0	3	41.05	62.93	0	43.48	0	bacA	NaN	NaN	NaN	45.82	12.6	10.98	0	40.85	39.48
emrA	60.52	0	0	60.52	25.31	0	0	10.1	0.32	emrA	NaN	NaN	NaN	24.22	7.59	24.59	0	48.37	23.03
insA_2	231.86	89.7	0.39	0	298.18	135.03	0	176.76	317.46	insA_2	112.13	30.07	0.27	0	103.07	76.25	0	121.69	147.5
dinJ	339.74	84.27	0.25	453.46	383.01	290.46	229.2	396.18	286.15	dinJ	201.44	72.36	0.36	234.18	146.61	183.55	117.95	203.23	323.14
ydjA	164.99	34.94	0.21	186.1	157.75	157.62	0	208.15	115.32	ydjA	94.59	10.22	0.11	87.79	36.16	84.02	0	101.8	104.74
serA	NaN	NaN	NaN	0	0	0	0	0	0	serA	NaN	NaN	NaN	0	0	0	0	0	0
prpC	NaN	NaN	NaN	25.24	37.59	46.68	0	20.46	16.36	prpC	52.48	0	0	29.86	7.54	22.23	0	52.48	35.06
aceB	1135.81	270.2	0.24	1384.98	1508.95	766.22	1050.1	998.34	1106.27	aceB	338.85	225.24	0.66	323.57	435.38	206.81	195.58	129.83	741.92
U66	NaN	NaN	NaN	0	0	0	0	0	0	U66	NaN	NaN	NaN	0	0	0	0	0	0
insA_1	82.92	21.64	0.26	86.01	117.23	66.07	0	62.86	82.44	insA_1	70.16	1.45	0.02	30.72	40.01	45.08	0	69.14	71.19
yaiI	59.72	10.17	0.17	54.68	53.45	37.59	0	74.91	55.85	yaiI	62.81	9.15	0.15	53.25	42.84	32.04	0	63.71	71.48
ybgH	64.66	8.14	0.13	68.48	44.47	70.18	0	55.31	19.11	ybgH	NaN	NaN	NaN	37.09	9.39	37.78	0	49.65	37.22
yebG	89.19	26.9	0.3	117.84	104.22	0	0	58.14	76.54	yebG	78.75	8.61	0.11	67.01	40.95	86.38	0	83.78	77.84
secE	524.33	130.82	0.25	582.66	508.4	438.67	319.3	619.21	677.76	secE	185.07	64.49	0.35	148.72	143.89	168.53	141.09	199.11	309.07
b0374	NaN	NaN	NaN	35.04	11.84	4.21	0	43.77	29.61	b0374	NaN	NaN	NaN	37.48	10.75	20.24	0	49.1	28.58
katE	NaN	NaN	NaN	14.05	22.86	40.52	0	30.49	38.26	katE	58.8	0	0	44.1	23.12	27.27	0	58.8	40.57
yhjX	62.15	0	0	0.77	37.11	62.15	0	0	3.89	yhjX	NaN	NaN	NaN	39.21	25.59	34.91	0	44.09	49.18
yajO	95.99	33.25	0.35	87.24	44.31	68	0	132.74	42.64	yajO	88.39	17.39	0.2	94.94	60.13	84.03	0	99.36	103.5
ybaP	136.71	35.56	0.26	179.64	144.15	112.61	0	90.15	157.01	ybaP	86.08	30.13	0.35	58.16	48.47	67.92	0	92.5	125.74
ybiS	241.18	87.59	0.36	383.47	157	210	0	259.51	195.94	ybiS	115.91	52.33	0.45	74.1	76.46	101.22	0	126.28	201.5
yfiE	93.84	26.88	0.29	126.08	111.06	86.39	0	90.38	55.28	yfiE	71.34	13.94	0.2	61.26	52.24	76.86	0	83.57	82.78
ybhM	NaN	NaN	NaN	15.97	29.87	0	0	30.05	7.86	ybhM	53.6	0	0	33.28	0.82	29.25	0	53.6	34.67
yaiZ	69.3	8.89	0.13	75.77	59.16	31	0	10.15	72.97	yaiZ	63.28	7.39	0.12	32.91	12.76	68.51	0	58.05	48.7
evgA	754.16	165.51	0.22	726.97	1006.95	490.74	769.79	800.28	730.23	evgA	433.61	218.81	0.5	389.62	514.21	350.93	172.61	353.86	820.44
secB	NaN	NaN	NaN	9.15	16.91	30.72	0	1.89	32.3	secB	NaN	NaN	NaN	32.26	2.73	16.44	0	43.84	35.78
ylaB	115.45	26.37	0.23	109.22	88.22	112.85	0	151.5	37.61	ylaB	88.63	31.38	0.35	93.6	82.38	33.15	0	51.25	127.27
allS	77.89	0	0	12.19	27.28	41.48	0	77.89	28.35	allS	52.75	0	0	25.14	5.95	42.57	0	45.24	52.75
ymfE	202.23	31.2	0.15	255.43	188.17	198.69	0	173.98	194.87	ymfE	117.46	34.63	0.29	93.25	87.21	111.26	0	121.19	174.4
ygbA	61.1	4.32	0.07	58.04	19.56	0	0	64.15	0	ygbA	NaN	NaN	NaN	26.08	11.77	30.13	0	42.32	26.19
ybjO	102.16	0	0	0	23.78	5.47	0	102.16	0	ybjO	60.89	0	0	0	21.08	26.97	0	60.89	21.55
ybaD	126.09	46.2	0.37	188.69	97.43	0	0	132.44	85.8	ybaD	76.9	0	0	46.64	38.61	44.3	0	46.97	76.9
ypjD	60.28	12.62	0.21	59.42	56.65	50.1	0	81.97	53.26	ypjD	61.54	12.15	0.2	50.92	9.19	58.89	0	74.79	46.82
secA	73.35	0	0	43.35	37.8	73.35	0	2.27	0	secA	81.42	0	0	25.2	1.8	39.22	0	81.42	22.47
ylaC	372.98	104.99	0.28	0	432.85	229.16	0	363.58	466.33	ylaC	114.58	51.82	0.45	0	66.01	80.65	0	131.94	179.73
ydcK	86.31	28.06	0.33	0	72.7	67.65	0	118.59	49.51	ydcK	125.35	33	0.26	0	111.09	98.05	0	119.17	173.1
minC	430.17	99.7	0.23	595.75	428.98	350.98	394.37	323.26	487.66	minC	266.58	86.85	0.33	269.83	238.33	249.86	191.48	215.07	434.9
nudH	253.38	71.05	0.28	346.16	247.04	40.63	0	173.02	247.32	nudH	149.24	61.88	0.41	118.62	123.46	98.89	0	150.25	254.96
ycaL	50.19	0	0	50.19	0	0	0	0	0.83	ycaL	NaN	NaN	NaN	32.36	0	0	0	39.85	20.06
ybaQ	87.28	17.06	0.2	75.22	31.61	0	0	99.34	0	ybaQ	NaN	NaN	NaN	43.47	15	39.47	0	41.02	0
yqcD	116.66	21.38	0.18	131.78	38.09	0	0	101.54	48.1	yqcD	53.13	0.88	0.02	52.52	21.64	19.34	0	53.75	49.05
emrE	77.49	20.05	0.26	38.09	55.83	71.06	0	103.8	79.27	emrE	65.02	11.05	0.17	57.21	20.26	33.98	0	45.39	72.84
ybaK	NaN	NaN	NaN	14.15	35.97	0	0	43.09	0	ybaK	NaN	NaN	NaN	34.73	30.5	0	0	35.46	35.67
allD	NaN	NaN	NaN	0.02	11.92	0	0	47.45	8.55	allD	NaN	NaN	NaN	37.64	6.25	0	0	25.72	31.49
ycgK	85.34	16.19	0.19	73.89	18.69	0	0	96.79	9.31	ycgK	52.04	0	0	43.67	15.02	42.96	0	42.54	52.04
yggH	198.57	70.45	0.35	266.99	132.57	279.51	0	176.78	137	yggH	61.69	1.34	0.02	47.87	30.19	61.63	0	63.06	60.39
ycaI	NaN	NaN	NaN	10.27	0	0	0	0	0.42	ycaI	NaN	NaN	NaN	29.06	18.75	0	0	34.86	0.87
allA	NaN	NaN	NaN	3.54	0	0	0	36.39	1.02	allA	NaN	NaN	NaN	34.26	29.19	3.6	0	35.54	42.17
nfnB	51.55	0	0	51.55	0	14.91	0	2.31	14.46	nfnB	NaN	NaN	NaN	46.34	43.77	35.27	0	34.47	39.27
ahpF	NaN	NaN	NaN	2.78	0	0	0	27.54	0	ahpF	NaN	NaN	NaN	34.06	0	19.85	0	26.49	37.06
ylbG	69.1	0	0	5.03	24.74	0	0	69.1	18.12	ylbG	NaN	NaN	NaN	33.24	20.35	18.77	0	32.89	46.34
dsbG	NaN	NaN	NaN	40.37	14.74	12.72	0	49.62	21.86	dsbG	70.08	9.6	0.14	69.52	61.41	71.59	0	62.52	85.36
ldhA	85.87	30.47	0.35	98.39	34.03	7.54	0	108.09	51.14	ldhA	89.71	52.39	0.58	182.98	64.29	60.81	0	65.91	74.56
mug	99.56	36.72	0.37	123.04	87.73	9.73	0	134.28	53.19	mug	95.99	30.77	0.32	88.52	58.19	86.39	0	104.66	142.19
ycbK	1800.69	527.91	0.29	2659.41	1680.99	1623.38	1493.7	2165.08	1181.62	ycbK	692.71	84.92	0.12	583.13	701.09	600.48	714.04	768.51	788.98
nhaA	62.68	0	0	62.68	22.24	27.56	0	0	13.81	nhaA	57.93	5.92	0.1	55.75	30.51	54.07	0	55.15	66.75
sodC	97.03	22.35	0.23	3	81.23	112.84	39.59	0	35.95	sodC	124.4	35.17	0.28	134.84	97.09	114.69	76.49	152.61	170.71
tatE	180.32	31.85	0.18	196.64	147.85	144.78	0	197.83	214.49	tatE	84.7	31.93	0.38	65.36	57.99	74.72	0	87.01	138.43
yagT	75.64	0	0	75.64	15.71	29.82	0	40.57	4.56	yagT	73.64	0	0	31.95	27.97	18.94	0	73.64	40.42
cbpA	205.07	93.52	0.46	349.08	247.03	155.03	156.35	117.84	37.13	cbpA	308.36	64.03	0.21	371.98	371.2	233.77	274.29	246.46	352.47
yddH	124.38	0	0	124.38	39.5	0	0	36.27	15.18	yddH	NaN	NaN	NaN	42.62	1.92	0	0	39.62	44.77
yneK	160.11	30.32	0.19	178.75	131.15	127.94	0	197.97	164.73	yneK	83	30.41	0.37	55.46	56	91.43	0	82.83	129.26
U139	NaN	NaN	NaN	0	0	0	0	0	0	U139	NaN	NaN	NaN	0	0	0	0	0	0
fdrA	NaN	NaN	NaN	6.48	0	0	0	0	0	fdrA	NaN	NaN	NaN	26.72	0	0	0	0	19.37
yaiX	66.42	13.87	0.21	63.51	54.24	49.7	0	81.51	19.7	yaiX	57.68	8.32	0.14	47.99	21.14	49.46	0	51.8	63.57
wrbA	NaN	NaN	NaN	0	0	0	0	0	0	wrbA	NaN	NaN	NaN	0	0	0	0	0	0
yahC	NaN	NaN	NaN	0.1	3.85	0	0	18.6	0	yahC	NaN	NaN	NaN	38.81	23.05	0	0	26.87	28.9
borD	334.57	107.19	0.32	337.66	195.52	387.4	0	477.04	275.22	borD	80.46	15.56	0.19	45.9	33.02	62.67	0	87.12	91.58
ydeI	NaN	NaN	NaN	3	0	0	0	0	0	ydeI	68.79	0	0	68.79	47.37	0	0.54	0	0
rob	447.75	129.19	0.29	583.03	560.51	350.87	296.86	548.32	346.93	rob	269.34	101.82	0.38	229.62	263.33	233.31	143.39	297.4	448.98
ycbW	126.86	50.62	0.4	174.36	107.69	88.86	0	187.08	76.31	ycbW	80.52	12.73	0.16	91.05	65.76	75.88	0	96.34	73.58
ahpC	84.36	35.49	0.42	109.45	14.85	14.32	0	59.26	4.48	ahpC	53.6	3.75	0.07	41.09	41.07	36.89	0	50.94	56.25
pmrD	93.47	28.28	0.3	122.96	40.74	31.92	0	90.88	66.59	pmrD	55.19	0	0	41.58	30.07	24.1	0	41.34	55.19
lolA	53.41	0	0	0	11.11	33.95	0	53.41	27.51	lolA	NaN	NaN	NaN	0	8.65	23.23	0	41.1	44.06
b0332	58.46	0	0	0	45.01	58.46	0	0	39.88	b0332	65.68	0	0	0	7.89	49.82	0	65.68	41.2
marC	135.12	20.71	0.15	158.18	147.07	117.21	0	22.08	118.05	marC	86.34	25.69	0.3	104.47	78.91	62.61	0	64.49	121.19
Empty	NaN	NaN	NaN	0	0	0	0	0	0	Empty	NaN	NaN	NaN	0	0	0	0	0	0
sulA	66.62	8.18	0.12	38.48	58.22	74.55	0	67.08	33.29	sulA	56.78	8.08	0.14	44.22	2.19	62.49	0	51.06	45.51
ycdN	220.99	132.53	0.6	85.96	237.21	0	352.38	345.88	83.52	ycdN	127.29	42.14	0.33	119.2	78.32	156.62	147.12	181.89	80.6
yccE	51.5	0	0	51.5	0	0	0	0	17.26	yccE	NaN	NaN	NaN	20.52	0	0	0	0	35.42
hscB	NaN	NaN	NaN	0	0	0	0	0	0	hscB	NaN	NaN	NaN	0	0	0	0	0	0
sanA	NaN	NaN	NaN	29.41	0	0	0	0	2.27	sanA	62.85	0	0	62.85	0	0	0	0	31.42
b0373	NaN	NaN	NaN	33.13	0	0	0	0	0.62	b0373	NaN	NaN	NaN	24.56	0	0	0	0	31.78
slyA	175.22	38.34	0.22	186.23	181.55	165.02	0	118.78	224.52	slyA	123.46	50.71	0.41	107.34	78.31	90.91	0	134.8	205.93
syd	96.91	10.32	0.11	103	36.59	0	85	102.73	47.33	syd	80.15	28	0.35	60.24	31.25	0	107.07	101.19	52.08
ybhQ	146.31	38.77	0.27	209.69	151.93	0	137.81	110.49	121.63	ybhQ	93.19	33.78	0.36	63.47	84.56	0	113.05	141.42	63.43
slt	78.43	20.15	0.26	86.92	51.08	0	98.35	77.38	34.99	slt	83.57	24.37	0.29	56.17	20.21	0	91.71	102.83	47.37
yojI	350.05	102.72	0.29	262.32	282.5	247.65	371.62	439.16	497.05	yojI	155.74	47.1	0.3	124.41	97.69	133.07	158.2	220.98	200.08
fhuC	89.79	26.98	0.3	66.73	31.21	0	83.17	119.46	16.67	fhuC	94.97	0.63	0.01	49.59	25.87	0	95.41	94.52	24.96
ycgN	254.15	66.12	0.26	321.5	193.87	153.53	264.55	294.73	296.73	ycgN	142.09	37.45	0.26	124.84	146.01	86.14	192.53	172.09	130.93
ybhA	60.8	0	0	47.32	40.9	0	60.8	24.42	26.89	ybhA	70.86	2.89	0.04	39.23	21.71	0	68.81	72.9	15.68
lacZ	NaN	NaN	NaN	0	0	0	0	0	0	lacZ	NaN	NaN	NaN	0	0	0	0	0	0
nfrB	81.14	11.16	0.14	79.5	35.32	0	93.04	70.89	21.84	nfrB	79.31	22.21	0.28	55.95	29.24	0	81.81	100.17	33.13
ybiN	211.56	44.62	0.21	243.44	202.01	0	155.71	268.17	188.45	ybiN	75.9	21.28	0.28	42.5	40.86	0	79.86	94.93	52.91
yadG	92.46	19.42	0.21	110.26	41.31	0	95.36	71.75	21.4	yadG	82.25	7.66	0.09	41.77	23.95	0	76.83	87.66	26.62
hisQ	106.97	27.88	0.26	126.68	24.81	0	87.26	30.15	35.56	hisQ	82.53	0.72	0.01	41.69	19.49	0	83.04	82.02	33
oppB	73.34	8.65	0.12	79.45	40.81	0	67.22	26.21	17.58	oppB	81.35	10.13	0.12	30.08	20.34	0	74.19	88.51	35.88
ycgY	79.22	26.05	0.33	97.64	9.37	0	60.81	11.04	35.64	ycgY	72.27	8.93	0.12	22.55	11.59	0	65.96	78.59	18.93
ybiM	67.68	0	0	48.1	1.41	0	0	67.68	7.89	ybiM	75.29	0	0	34.44	20.09	0	0	75.29	9.48
kefG	110.12	63.58	0.58	178.81	45.98	0	47.01	98.21	53.34	kefG	116.02	44.56	0.38	70.81	75.77	0	130.15	179.37	124
b0255	69.19	12.99	0.19	80.61	25.51	0	71.91	55.05	28.9	b0255	69.89	14.11	0.2	56.75	21.83	0	84.8	68.11	12.6
sbmA	84.89	12.07	0.14	72.23	48.92	0	86.16	96.27	44.86	sbmA	84.78	29.28	0.35	51.64	29.12	0	95.55	107.13	27.19
serA	NaN	NaN	NaN	0	0	0	0	0	0	serA	NaN	NaN	NaN	0	0	0	0	0	0
cysW	67.7	0	0	37.21	28.79	0	67.7	28.44	36.63	cysW	84.47	10.63	0.13	26.15	23.71	0	91.99	76.96	30.1
ydeA	75.76	22.1	0.29	0	36.54	0	95.46	79.97	51.86	ydeA	82.31	6.01	0.07	0	10.73	0	78.06	86.56	32.71
U66	NaN	NaN	NaN	0	0	0	0	0	0	U66	NaN	NaN	NaN	0	0	0	0	0	0
b0656	144.68	47	0.32	218.06	142.99	0	152.71	114.97	94.67	b0656	84.76	28.89	0.34	56.34	69.97	0	102.63	126.35	68.52
yjjK	189.36	77.56	0.41	291.87	154.42	72.25	193.66	169.63	254.33	yjjK	185.76	37.86	0.2	195.51	147.91	128.96	216.61	212.9	212.7
yagE	88.86	18.85	0.21	99.2	66.75	0	85.18	115.2	77.98	yagE	80.51	15.84	0.2	69.8	46.8	0	94.85	93.28	64.1
ybbL	74.37	24.32	0.33	81.39	68.52	0	112.83	57.56	51.57	ybbL	85.73	23.31	0.27	58.82	39.15	0	98.61	99.75	30.93
gltJ	104.71	19.25	0.18	118.32	37.49	0	91.1	14.62	38.06	gltJ	101.18	1.08	0.01	37.61	16.89	0	100.42	101.94	22.8
ugpA	76.96	4.3	0.06	80	21.74	0	73.92	14.63	30.72	ugpA	82.02	1.81	0.02	29.27	26.68	0	80.74	83.3	17.47
yhdX	82.99	24.18	0.29	106.14	3.78	0	84.93	57.89	28.06	yhdX	84.74	20.32	0.24	47.46	19.15	0	70.38	99.11	23.96
b1228	69.08	20.96	0.3	92.47	25.5	0	62.74	52.01	28.78	b1228	81.99	10.61	0.13	38.73	10.24	0	74.48	89.49	18.05
ampH	98.31	27.54	0.28	128.61	37.89	0	91.53	74.79	26.02	ampH	86.44	0.87	0.01	35.11	46.39	0	87.05	85.82	39.73
racC	68.57	13.81	0.2	81.25	0	0	53.86	70.61	30.61	racC	76.72	1.55	0.02	32.52	21.48	0	75.63	77.81	18.9
b0540	60.95	1.57	0.03	59.84	23.32	0	62.06	33.22	19.6	b0540	77.5	12.07	0.16	63.74	9.95	0	86.29	82.48	22.47
kdsB	84.43	5.64	0.07	49.37	25.72	0	88.42	80.44	38.07	kdsB	82.64	12.21	0.15	69.76	36.28	0	94.06	84.11	39.91
ybeZ	138.35	27.54	0.2	166.73	0	0	149.27	101.69	135.69	ybeZ	126.75	11.43	0.09	122.38	0	0	139.29	132.19	113.12
dppB	79.89	0	0	48.76	29.95	0	79.89	0	0	dppB	78.63	0	0	17.18	1.61	0	78.63	0	0
yhdY	66.27	4.66	0.07	62.98	32.71	0	69.57	40.25	4.64	yhdY	88.13	2.05	0.02	41.98	11.21	0	86.69	89.58	23.02
rluB	130.63	41.32	0.32	189.7	83.14	0	121.33	151.79	107.18	rluB	78.94	25.25	0.32	54.75	32.9	0	76.96	105.12	49.46
yadF	419.89	69.92	0.17	526.09	370.51	0	388.32	454.8	359.71	yadF	109.91	35.44	0.32	96.6	69.35	0	132.41	158.79	92.41
ybaL	178.37	49.68	0.28	258.19	120.93	0	166.08	173.8	172.84	ybaL	114.91	27.22	0.24	79.56	97.53	0	148.16	132.27	117.04
cusC	52.57	3.46	0.07	50.13	10.06	0	55.02	34.87	0	cusC	72.71	17.26	0.24	37.76	21.28	0	60.51	84.92	0
entS	109.6	52.68	0.48	95.17	73.15	0	199.55	108.89	71.24	entS	128.62	36.42	0.28	126.69	86.37	0	151.09	176.73	102.2
modF	92.26	23.14	0.25	83.16	63.86	0	113.73	26.91	108.28	modF	122.37	43.87	0.36	99.15	60.94	0	129.34	148.62	173.83
pstC	64.65	14.5	0.22	54.4	34.39	0	74.9	16.27	38.52	pstC	87.22	6.51	0.07	90.19	28.77	0	79.75	91.71	40.84
xylG	53.38	2.53	0.05	51.6	22.99	0	6.8	55.17	18.85	xylG	68.05	18.37	0.27	44.96	7.31	0	55.06	81.04	18.56
yciS	75.67	14.17	0.19	91.71	61.49	0	89.11	63.16	72.88	yciS	77.12	12.02	0.16	63.82	27.65	0	80.32	87.22	37.69
ygeR	90.66	17.7	0.2	79.2	88.72	0	118.57	72.59	94.23	ygeR	81.48	30.47	0.37	77.1	51.17	0	103.34	121.17	54.62
zitB	69.51	10.13	0.15	65.72	59.93	0	85.03	73.95	62.89	zitB	71.27	22.48	0.32	50.63	35.53	0	92.62	88.72	53.1
ybdR	50.35	0	0	30.87	2.81	0	50.35	25.61	0	ybdR	66.18	16.01	0.24	50.15	20.17	0	66.23	82.17	0
lolC	81.16	28.36	0.35	124.35	50.45	0	89.05	62.64	79.33	lolC	82.68	11.42	0.14	71.72	35.19	0	81.8	94.51	37.88
artP	391.56	129.87	0.33	637.7	350.81	259.43	405.39	365.94	330.06	artP	298.61	91.01	0.3	385.19	318.67	148.03	315.06	240.97	383.73
alsA	NaN	NaN	NaN	0	4.76	0	24.31	45.73	0	alsA	63.23	8.8	0.14	0	21.69	0	69.46	57.01	0
ytfR	NaN	NaN	NaN	11.37	0.59	0	37.8	9.52	20.1	ytfR	65.39	3.97	0.06	44.75	17.46	0	62.58	68.2	3.48
perR	69.23	5.63	0.08	70.21	24.71	0	74.3	63.17	23.26	perR	81.16	2.14	0.03	42.66	13.02	0	79.64	82.67	3.28
fepD	76.94	19.02	0.25	55.67	37.41	0	92.33	82.82	29.69	fepD	106.28	20.9	0.2	45.02	29.33	0	91.5	121.06	45.18
sapA	75.51	19.7	0.26	89.84	50.98	0	98.11	78.18	60.44	sapA	70.32	16.27	0.23	53.2	30.09	0	72.2	85.56	46.1
ybeR	NaN	NaN	NaN	18.46	13.82	0	46.84	16	0	ybeR	60.87	9.99	0.16	52.71	19.31	0	57.89	72.02	13.68
pepT	65.29	9.76	0.15	40.25	0	0	72.2	58.39	6.16	pepT	84.34	6.54	0.08	76.79	0	0	87.99	88.24	41.04
cydD	133.09	25.48	0.19	151.81	93.67	0	126.63	158.53	134.82	cydD	95.43	11.24	0.12	85.69	43.27	0	92.6	111.65	91.79
phnC	61.89	0	0	0	1.4	0	0.08	61.89	0	phnC	56	0.49	0.01	0	30.84	0	55.65	56.35	12.21
ycdZ	150.48	63.12	0.42	256.36	104.94	0	120.2	160.79	110.13	ycdZ	96.82	15.26	0.16	101.37	103.55	0	94.48	112.6	72.09
cusR	154.73	72.68	0.47	96.82	102.66	0	149.2	147.81	277.15	cusR	84.12	25.04	0.3	53.45	34.01	0	92.51	112.89	77.63
ycfT	63.52	1.62	0.03	17.52	31.44	0	62.38	64.66	12.94	ycfT	68.33	6.12	0.09	61.56	17.98	0	69.96	73.47	13.81
mglB	131.78	23.3	0.18	125.59	100.49	0	161.92	125.01	145.91	mglB	87.23	16.68	0.19	39.42	100.56	0	68.52	92.6	49.99
ybeU	65.39	0	0	27.98	0	0	43.72	65.39	0.31	ybeU	68.13	5.42	0.08	64.06	25.71	0	66.04	74.27	14.83
znuC	73.56	24.92	0.34	101.27	37.43	0	66.46	49.61	52.96	znuC	79.28	5.14	0.06	80.41	33.89	0	83.76	73.67	33.05
yddA	139.62	25.29	0.18	121.74	30.4	0	157.51	37.81	34.75	yddA	142.73	61.69	0.43	152.67	59.4	0	202.32	197.23	102.02
ybdF	64.12	0	0	12.72	5.22	0	64.12	48.5	7.02	ybdF	66.08	11.87	0.18	52.72	30.2	0	70.16	75.37	20.83
ymdB	62.31	4.65	0.07	59.02	26.61	0	65.59	49.58	33.98	ymdB	84.19	23.13	0.27	70.36	32.82	0	100.73	106.67	59.01
uspG	108.78	53.51	0.49	80.06	64.71	0	66.27	177.31	155.53	uspG	83.25	24.78	0.3	70.81	49.45	0	98.27	108.98	54.96
potA	145.86	15.56	0.11	157.75	125.88	0	164.25	136.46	144.94	potA	85.85	30.89	0.36	60	49.65	0	112.44	112.74	58.2
nupX	68.73	6.19	0.09	76.17	39.28	0	65.98	70.9	61.86	nupX	74.15	3.74	0.05	34.28	19.07	0	71.51	76.79	18.18
ubiF	57.91	4.69	0.08	61.22	32.15	0	54.59	36.18	41.36	ubiF	79.26	6.69	0.08	72.19	28.93	0	80.09	85.5	33.34
yfhH	57.44	5.73	0.1	53.39	0	0	61.49	27.32	20.37	yfhH	73.62	12.83	0.17	59.09	0	0	83.36	78.42	18.72
U139	NaN	NaN	NaN	0	0	0	0	0	0	U139	NaN	NaN	NaN	0	0	0	0	0	0
ybdN	NaN	NaN	NaN	0	13.79	0	20.35	0	0	ybdN	59.55	0.72	0.01	0	33.97	0	59.04	60.06	0
yceK	68.89	24.4	0.35	51.64	19.56	0	36.22	86.15	15.12	yceK	71.59	21.14	0.3	49.84	27.45	0	56.64	86.54	23.04
wrbA	NaN	NaN	NaN	0	0	0	0	0	0	wrbA	NaN	NaN	NaN	0	0	0	0	0	0
znuA	69.22	13.16	0.19	47.72	59.91	0	78.52	44.75	37.51	znuA	86.64	14.87	0.17	70.71	46.63	0	89.05	100.15	47.28
yeiM	NaN	NaN	NaN	42.44	7.91	0	37.17	0.66	41.07	yeiM	61.17	9.48	0.16	55.25	31.47	0	56.16	72.11	22.96
ybhE	76.3	20.62	0.27	100.1	37.65	0	64.39	64.4	17.16	ybhE	84.16	24.64	0.29	82.78	56.13	0	116.01	100.61	65.26
yrbG	90.6	21.14	0.23	126.54	70.46	0	83.8	87.47	84.71	yrbG	74.96	19.85	0.26	74.03	51.43	0	93.1	96.47	59.78
btuC	69.46	0	0	69.46	35.33	0	45.67	1.02	0	btuC	74.77	5.88	0.08	47.83	23.49	0	70.62	78.92	0
rihA	62.92	0	0	37.53	27.82	0	62.92	23.6	48.72	rihA	60.98	11.72	0.19	52.62	26.93	0	74.37	55.95	35.96
ycfJ	NaN	NaN	NaN	0	0	0	23.95	28.33	0	ycfJ	70	1.78	0.03	0	32.37	0	68.74	71.26	5.92
ybeQ	62.55	9.34	0.15	16.07	33.92	0	55.95	69.16	0	ybeQ	81.73	2.92	0.04	35.32	11.09	0	83.79	79.66	0
yfhB	74.73	3.79	0.05	73.97	42.82	0	78.83	71.37	30.19	yfhB	72.71	15.87	0.22	65.25	20.82	0	61.94	90.93	33.31
hisJ	96.54	29.1	0.3	143.3	65.01	0	86.27	87.36	100.76	hisJ	71.92	16.45	0.23	84.28	38.9	0	58.95	87.89	56.55
Empty	NaN	NaN	NaN	0	0	0	0	0	0	Empty	NaN	NaN	NaN	0	0	0	0	0	0
yheS	70.76	17.43	0.25	61.07	0	0	60.34	90.88	46.09	yheS	77.01	19.37	0.25	55.47	0	0	82.53	93.02	32.38
mglA	NaN	NaN	NaN	23.5	15.41	0	27.74	14.19	4	mglA	69.22	2.56	0.04	46.84	24.56	0	67.41	71.04	16.35
ycdO	NaN	NaN	NaN	0	7.05	0	47.99	0	0	ycdO	73.58	0	0	0	19.31	0	73.58	0	0
ycgH	101.19	0	0	40.43	0	0	20.43	101.19	7.35	ycgH	61.74	8.53	0.14	52.58	18.62	0	63.19	69.45	7.8
ybeT	NaN	NaN	NaN	0	7.76	0	3.84	48.79	0	ybeT	84.83	0	0	0	23.08	0	49.5	84.83	0
yrbF	142.92	25.33	0.18	180.67	114.85	0	126.28	151.51	141.28	yrbF	100.08	16.34	0.16	116.16	76.76	0	112.56	104.35	90.54
yphF	57.95	3.66	0.06	23.82	16.31	0	60.54	55.37	13.6	yphF	66.68	14.71	0.22	51.09	18.97	0	80.32	68.63	23.45
ugpB	60.75	8.2	0.13	0	7.21	0	54.95	66.54	17.23	ugpB	71.62	20.09	0.28	0	56.85	0	63.52	94.49	22.88
ybjH	81.66	38.44	0.47	39.27	56.81	0	0	62.24	125.93	ybjH	73.44	0	0	36.04	38.47	0	0	73.44	22.49
yiiP	NaN	NaN	NaN	0	28.42	0	0	15.44	42.69	yiiP	NaN	NaN	NaN	0	39.32	0	0	32.01	31.2
ydcX	692.96	205.07	0.3	937.46	738.16	0	478.5	824.98	485.68	ydcX	140.88	35.26	0.25	97.59	175.47	0	45.52	162.86	127.61
ybjM	101.95	62.86	0.62	195.24	83.75	0	64.19	38.25	64.6	ybjM	118.87	14.55	0.12	132.26	132.02	0	122.95	101.3	105.85
ynaI	178.04	34.5	0.19	217.54	186.36	0	132.82	200.01	153.47	ynaI	143.79	19.4	0.13	136.53	151.3	0	141.72	118.32	171.06
clpS	NaN	NaN	NaN	48.65	24.27	0	0	0	0	clpS	NaN	NaN	NaN	41.76	34.2	0	0	0	0
lacZ	NaN	NaN	NaN	0	0	0	0	0	0	lacZ	NaN	NaN	NaN	0	0	0	0	0	0
dctA	95.43	8.93	0.09	105.5	92.33	0	88.47	0	0	dctA	NaN	NaN	NaN	22.35	48.26	0	27.46	0	0
ymcC	839.6	223.25	0.27	1274.59	726.39	770.57	692.73	873.89	699.43	ymcC	501.91	28.27	0.06	478.63	485.5	507.69	502.84	482.3	554.5
ybdK	NaN	NaN	NaN	7.87	0	0	0	0	0	ybdK	69.8	10.59	0.15	71.09	79.41	0	73.91	25.58	54.77
stfE	NaN	NaN	NaN	6.98	0.64	0	0.51	0	0	stfE	NaN	NaN	NaN	39.85	44.45	0	0.38	0	0
betT	94.45	48.49	0.51	162.66	95.19	0	0	56.41	63.56	betT	54.07	0	0	32.69	54.07	0	0	28.46	29.87
ydfE	NaN	NaN	NaN	20.1	0.97	0	0	0	0	ydfE	NaN	NaN	NaN	30.67	33.03	0	0	0	0
ycaD	152.32	36.33	0.24	200.26	157.55	0	170.48	110.28	123.05	ycaD	75.62	20.07	0.27	75.14	95.93	0	55.79	28.84	18.35
ushA	76.52	0	0	76.52	46.65	0	0	8.29	36.49	ushA	63.78	16.31	0.26	54.8	82.6	0	24.61	22.22	53.94
dppA	184.2	65.06	0.35	224.61	123.25	0	196.59	263.76	112.77	dppA	121	46.05	0.38	65.43	180.53	0	98	106.61	154.41
yccM	NaN	NaN	NaN	44.31	0	0	0	0	0	yccM	NaN	NaN	NaN	4.15	0	0	0	0	0
serA	NaN	NaN	NaN	0	0	0	0	0	0	serA	NaN	NaN	NaN	0	0	0	0	0	0
yncI	59.05	0	0	59.05	38.54	0	1.35	0	0	yncI	62.51	0	0	46.4	62.51	0	19.54	0	0
entC	92.66	24.46	0.26	0	42.41	0	120.41	83.36	74.22	entC	76.74	0	0	0	49.63	0	32.82	76.74	42.91
U66	NaN	NaN	NaN	0	0	0	0	0	0	U66	NaN	NaN	NaN	0	0	0	0	0	0
ycaK	NaN	NaN	NaN	37.8	7.05	0	0	0	0	ycaK	52.09	0	0	23.26	52.09	0	0	0	0
ynfM	144.25	88.77	0.62	207.02	81.48	0	24.94	0	48.66	ynfM	NaN	NaN	NaN	31.87	49.44	0	24.2	5.4	28.32
alsB	71.4	3.27	0.05	73.71	19.64	0	69.09	0	0	alsB	70.79	9.55	0.13	65.99	64.52	0	67.65	84.99	49.72
ybcV	77.16	0	0	77.16	14.04	0	0	8.65	0	ybcV	NaN	NaN	NaN	22.36	46.33	0	8.77	17.56	0
yjcE	NaN	NaN	NaN	2.23	8.11	0	0	0	0	yjcE	56.37	0	0	45.54	56.37	0	0	0	0
ydfZ	74.75	0	0	74.75	0	0	0	18.58	35.01	ydfZ	NaN	NaN	NaN	44.58	0	0	0	24.86	24.69
ytfQ	NaN	NaN	NaN	42.71	16.34	0	0	0	0	ytfQ	NaN	NaN	NaN	24.47	41.23	0	0	0	0
ydgD	117.34	16.4	0.14	134.36	112.55	0	96.74	125.7	32.45	ydgD	95.09	28.36	0.3	63.25	127.73	0	94.11	71.34	119.03
ycaP	53.22	0	0	53.22	0	0	0	0	0	ycaP	68.99	0	0	34.65	68.99	0	5.39	0	0
mdtK	76.79	13.57	0.18	75.17	63.56	0	71.73	73.82	99.68	mdtK	76.8	11.33	0.15	67.29	90.95	0	80.33	63.3	82.11
dcuA	94.03	24.97	0.27	116.93	97.76	0	0	67.41	22.59	dcuA	64.91	9.07	0.14	52.72	64.93	0	0	74.47	67.53
ybhI	NaN	NaN	NaN	1.46	0	0	0	0	0	ybhI	50.16	0	0	50.16	0	0	0	0	0
b1367	NaN	NaN	NaN	1.51	0.49	0	0	0	0	b1367	52.57	0	0	28.55	52.57	0	0	0	0
yceP	557.02	274.8	0.49	1006.78	570.46	0	523.87	287.17	396.8	yceP	368.5	96.79	0.26	338.79	370.73	0	406.09	230.94	495.97
crcA	NaN	NaN	NaN	27.79	0	0	0	0	0	crcA	64.4	0	0	38.93	64.4	0	0	11.85	0
ydgA	73.63	19.83	0.27	87.65	59.61	0	25.76	24.05	24.82	ydgA	82.19	23.18	0.28	64.5	113.5	0	64.75	38.28	86.01
ftsQ	53.96	0	0	53.96	34.55	0	0	0	0	ftsQ	58.41	0	0	31.99	58.41	0	0	0	0
yebQ	112.32	53.51	0.48	204.7	102.5	0	79.59	71.43	103.39	yebQ	73.74	13.39	0.18	69.86	97.59	0	67.05	67.04	67.16
ybfG	NaN	NaN	NaN	49.55	20.56	0	0	0	0	ybfG	NaN	NaN	NaN	21.66	26.06	0	0	0	0
potF	NaN	NaN	NaN	3	5.73	0	0	0	0	potF	59.41	0	0	48.54	59.41	0	20.67	27.55	28.05
ydbC	NaN	NaN	NaN	0.01	0	0	0	0	0	ydbC	NaN	NaN	NaN	40.95	49.53	0	0	0	0
pspF	293.97	174.48	0.59	541.19	380.9	0	260.32	85.36	202.09	pspF	131.45	48.07	0.37	121.56	171.53	0	117.78	63.14	183.25
ybjP	53.96	0	0	34.47	53.96	0	8.59	31.97	0.5	ybjP	77.29	10.77	0.14	73.66	85.18	0	44.41	63.67	86.62
ydgK	101.82	40.42	0.4	142.98	100.32	0	0	0	62.17	ydgK	NaN	NaN	NaN	26.96	48.93	0	0	0	19.98
ycdC	NaN	NaN	NaN	0	24.6	0	0	0	0	ycdC	59.6	0	0	36.17	59.6	0	0	0	0
setA	79.37	0	0	79.37	34.83	0	0	0	39.66	setA	66.8	23.05	0.35	48.36	83.09	0	0	0	50.5
cvpA	2054.11	568.49	0.28	2547.82	1972.17	1419.32	1614.41	1861.29	2909.67	cvpA	496.44	167.72	0.34	406.92	577.86	491.71	293.17	429.42	779.59
oppA	1490.81	781.9	0.52	2764.88	1774.53	394.55	1266.71	1181.16	1563.01	oppA	477.83	256.1	0.54	495.38	717.46	130.39	576.15	209.43	738.19
ydbD	51.25	0	0	51.25	18.05	0	0	0	14.31	ydbD	53.98	0	0	32.3	53.98	0	0	0	21.22
ycfS	NaN	NaN	NaN	38.01	47.39	0	0	17.79	23.74	ycfS	NaN	NaN	NaN	31.48	35.38	0	0	37	44.45
ybjL	140.59	54.35	0.39	213.88	105.65	0	74.02	168.73	140.68	ybjL	84.94	3.48	0.04	37.41	82.48	0	45.58	42.4	87.4
ydgR	460.24	223.75	0.49	734.58	596.1	0	245.39	218.86	506.25	ydgR	128.33	56.48	0.44	123.36	194.42	0	57.09	6.23	138.45
ymdE	NaN	NaN	NaN	3	0	0	0	0	0	ymdE	NaN	NaN	NaN	41.53	42.71	0	0	0	0
selC	NaN	NaN	NaN	3	0.89	0	0	0	0	selC	55.54	0	0	33.98	55.54	0	0	0	0
ybiJ	NaN	NaN	NaN	45.01	47.66	0	0	26.5	48.94	ybiJ	NaN	NaN	NaN	37.42	26.92	0	0	48.18	27.32
ydcS	NaN	NaN	NaN	44.68	0	0	0	0	0	ydcS	146.64	0	0	40.99	146.64	0	0	0	32
ydcF	NaN	NaN	NaN	7.41	26.96	0	0	0	0	ydcF	NaN	NaN	NaN	48.18	35.35	0	17.83	0	0
ycfD	119.64	34.52	0.29	62.08	144.49	0	117.7	126.24	147.69	ycfD	128.3	36.3	0.28	148.56	144.72	0	96.6	83.52	168.08
yliG	138.62	7.26	0.05	131.18	39.27	0	0	138.98	145.69	yliG	NaN	NaN	NaN	39.2	41.19	0	0	41.46	28.77
ydhR	58.63	0	0	58.63	39.74	0	0	0	0	ydhR	60.34	10.19	0.17	53.13	67.54	0	28.81	0	0
sra	1200.76	306.54	0.26	1627.62	1460.42	1048.42	1192.01	1109.61	766.47	sra	233.05	90.82	0.39	195.1	298.11	164.24	136.25	225.26	379.36
racR	1648.46	615.37	0.37	2637.61	1783.15	842.35	1659.61	1173.54	1794.51	racR	781.84	253.21	0.32	769.23	855.95	551.47	684.2	585.85	1244.33
nmpC	264.3	113.15	0.43	412.6	216.73	0	241.22	117.29	333.66	nmpC	73.71	0	0	12.2	31.09	0	38.18	37.73	73.71
yeaV	58.68	0	0	58.68	0	0	0	0	0	yeaV	NaN	NaN	NaN	21.19	0	0	0	0	0
yliE	NaN	NaN	NaN	0	46.88	0	0	0	0	yliE	50.61	0	0	0	50.61	0	0	0	0
ycgX	114.85	0	0	114.85	43.84	0	22.65	0	0	ycgX	58.43	0	0	34.81	58.43	0	21.03	0	0
fepB	NaN	NaN	NaN	41.59	25.33	0	0	0	48.53	fepB	54.16	0	0	41.67	54.16	0	0	38.25	39.39
ydhS	NaN	NaN	NaN	25.49	0	0	0.21	6.93	0	ydhS	65.61	6.24	0.1	61.2	70.02	0	36.3	30.56	42.83
ycfR	133.77	80.32	0.6	249.96	111.75	0	108.3	23.56	65.06	ycfR	104.44	21.62	0.21	115.59	129.35	0	88.34	38.49	84.49
uxuA	NaN	NaN	NaN	0	1.4	0	0	0	32.02	uxuA	NaN	NaN	NaN	0	21.62	0	0	0	14.01
ybiU	NaN	NaN	NaN	49.26	4.38	0	0	0	0	ybiU	NaN	NaN	NaN	30.28	17.44	0	0	0	0
yejA	125.18	45.94	0.37	194.94	133.95	0	73.99	95.62	127.42	yejA	95.55	47.32	0.5	59.44	105.66	0	58.7	33.01	158.42
U139	NaN	NaN	NaN	0	0	0	0	0	0	U139	NaN	NaN	NaN	0	0	0	0	0	0
b1240	NaN	NaN	NaN	42.75	5.82	0	0	0	0	b1240	NaN	NaN	NaN	22.69	31.09	0	0	0	0
ybaE	NaN	NaN	NaN	0	0.02	0	0	0	0	ybaE	NaN	NaN	NaN	0	46.56	0	0	0	0
wrbA	NaN	NaN	NaN	0	0	0	0	0	0	wrbA	NaN	NaN	NaN	0	0	0	0	0	0
ymfI	NaN	NaN	NaN	3	20.55	0	0	0	17.21	ymfI	75.9	11.03	0.15	68.1	83.7	0	30.22	19.91	47.63
lacY	NaN	NaN	NaN	0	0	0	0	0.67	27.29	lacY	58.43	0.21	0	58.28	58.58	0	5.69	0	23.53
ybiV	140.35	43.47	0.31	205.91	151.74	0	99.35	102.31	142.45	ybiV	93.35	7	0.07	88.03	91.39	0	86.77	96.78	103.78
sstT	228.16	79.73	0.35	337.91	144.06	0	209.67	279.07	170.07	sstT	220	62.58	0.28	200.38	165.37	0	168.66	253.04	312.55
ydcL	95.2	28.84	0.3	125.73	110.68	0	60.67	38.17	83.71	ydcL	109.82	22.74	0.21	83.72	117.37	0	138.29	120.19	89.51
yciA	122.45	45.13	0.37	174.04	103.01	0	40.8	0	90.3	yciA	67.14	11.57	0.17	58.96	75.32	0	23.85	0	37.15
nanR	58	7.09	0.12	0	49.34	0	0	52.99	63.01	nanR	NaN	NaN	NaN	0	43.26	0	0	48.94	30.97
ydiL	NaN	NaN	NaN	0	4.71	0	0	0	0	ydiL	NaN	NaN	NaN	0	27.99	0	0	0	0
ycgI	NaN	NaN	NaN	0	46.42	0	0	45.08	0.28	ycgI	NaN	NaN	NaN	0	36.04	0	0	33.14	15.23
araJ	87.18	24.07	0.28	112.34	75.55	0	101.38	45.05	59.46	araJ	65.69	9.8	0.15	59.72	67.19	0	52.14	75.05	74.37
Empty	NaN	NaN	NaN	0	0	0	0	0	0	Empty	NaN	NaN	NaN	0	0	0	0	0	0
ybcY	61.1	12.81	0.21	22.09	70.15	0	52.04	45.69	34.72	ybcY	55.06	3.39	0.06	52.19	54.19	0	45.06	39.55	58.8
ydcA	NaN	NaN	NaN	0	24.15	0	0	0	31.92	ydcA	NaN	NaN	NaN	0	22.12	0	0	0	20.46
ybjQ	57.23	0	0	14.51	57.23	0	35.11	30.69	32.34	ybjQ	92.78	14.7	0.16	98.96	98.72	0	77.7	77.54	110.98
ppa	783.55	388.29	0.5	1489.67	675.84	333.59	616.49	712	873.73	ppa	282.1	34.43	0.12	276.43	294.49	265.15	243.35	269.46	343.69
kil	NaN	NaN	NaN	3.01	23.46	0	0	0	17.01	kil	NaN	NaN	NaN	27.53	27.5	0	0	0	11.21
ymgE	51.23	0	0	3	21.23	0	3.73	51.23	1	ymgE	65.58	3.39	0.05	63.18	67.98	0	26.11	39.41	42.17
yajR	60.62	0	0	0	13.91	0	0	0	60.62	yajR	NaN	NaN	NaN	0	47.82	0	0	0	29.84
focA	138.45	53.28	0.38	217	122.31	29.6	115.58	39.89	98.92	focA	456.38	217.47	0.48	746.23	351.3	399.63	371.51	179.81	689.81
yqhH	NaN	NaN	NaN	3	0.96	33.1	0	0	23.75	yqhH	68.25	0	0	68.25	10.53	13.75	0	0	10.19
ycaN	115.76	25.92	0.22	116	119.71	73.72	0	144.37	125.03	ycaN	100.44	39.72	0.4	113.07	82.81	63.94	0	78.5	163.89
fsr	53.37	0	0	53.37	0	0	0	0	36.78	fsr	62.36	0	0	62.36	4.7	0	0	0	22
ycjZ	99.88	41.33	0.41	129.1	38.3	46.99	0	0	70.65	ycjZ	64.38	0	0	64.38	39.66	49.24	0	0	49.75
yneH	125.9	48.28	0.38	187.25	102.6	137.22	0	58.39	144.06	yneH	85.58	0	0	85.58	38.67	34.06	0	38.95	49.6
ycjY	NaN	NaN	NaN	36.96	0	0	0	0	0	ycjY	62.45	0	0	62.45	9.52	17.33	0	0	5.09
lacZ	NaN	NaN	NaN	0	0	0	0	0	0	lacZ	NaN	NaN	NaN	0	0	0	0	0	0
mdtG	NaN	NaN	NaN	24.58	1	0	0	0	31.44	mdtG	67.3	0	0	67.3	1.5	0	0	0	32
gmr	81.7	23.35	0.29	105.32	37.05	81.17	0	0	58.62	gmr	67.17	12.94	0.19	81.91	57.66	37.92	0	0	61.94
ycaO	118.25	45.05	0.38	137.32	64.49	169	0	0	102.18	ycaO	83.06	0	0	83.06	14.01	42.25	0	0	24.57
ynfL	NaN	NaN	NaN	19.46	1.05	7.2	0	0	1.24	ynfL	52.21	0	0	52.21	18.95	12.37	0	0	13.3
fes	65.11	0	0	65.11	1.57	0	0	24.88	38.03	fes	153.08	54.86	0.36	211.74	62.27	161.84	0	163.85	165.68
nohA	57.99	0	0	57.99	0	0	0	0	0	nohA	62.58	0	0	62.58	0.51	20.6	0	0	5.76
fepA	NaN	NaN	NaN	29.32	0	33.07	0	0	14.94	fepA	90.73	15.16	0.17	101.45	33.19	80.01	0	41.73	26.93
ygfU	182.39	101.4	0.56	338.17	127.43	73.22	0	155.89	217.27	ygfU	69.49	1.55	0.02	70.59	35.75	36.9	0	20.32	68.4
narU	NaN	NaN	NaN	16.74	39.75	0	0	0	17.4	narU	80.42	0	0	80.42	39.02	33.03	0	0	29.48
ymjA	116.57	36.62	0.31	171.17	103.92	94.88	0	45.84	96.29	ymjA	83.36	43.46	0.52	114.09	45.21	52.63	0	38.2	46.02
serA	NaN	NaN	NaN	0	0	0	0	0	0	serA	NaN	NaN	NaN	0	0	0	0	0	0
ydhB	67.88	0	0	67.88	0.01	6.73	0	0	0	ydhB	63.3	0	0	63.3	5.82	25.93	0	0	0
cmr	53.31	4.55	0.09	50.09	22.12	56.53	0	0	24.73	cmr	56.37	0	0	56.37	13.27	15.83	0	0	22.11
U66	NaN	NaN	NaN	0	0	0	0	0	0	U66	NaN	NaN	NaN	0	0	0	0	0	0
narX	58.43	0	0	58.43	0.52	0	0	0	25.01	narX	59.45	0	0	59.45	0.44	0	0	0	0.5
pitA	583.09	181.04	0.31	801.3	631.58	349.08	379.12	630.81	706.67	pitA	165.76	45.92	0.28	196.25	215.9	116.98	119.11	138.27	208.07
ydjE	NaN	NaN	NaN	24.35	0	29.76	0	0	18.88	ydjE	66.41	0	0	66.41	2.26	16.06	0	0	1.35
uspE	767.56	413.89	0.54	1017.89	935.36	148.82	0	0	968.17	uspE	136.1	83.47	0.61	89.26	163.39	51.62	0	0	240.14
ycdM	59.87	0	0	59.87	0	0	0	0	0	ycdM	72.89	0	0	72.89	0.62	0	0	0	0.84
ribE	120.79	8.52	0.07	116.72	117.43	133.5	0	0	115.49	ribE	73.57	18.98	0.26	81.58	65.54	51.76	0	0	95.41
tonB	620.16	163.04	0.26	725.05	500.04	476.83	899.71	532.45	586.9	tonB	490.12	120.73	0.25	482.01	383.83	526.6	353.05	502.04	693.22
glnH	247.18	37.81	0.15	288.86	0	237.56	0	0	215.1	glnH	102.4	0.95	0.01	101.73	0	25.29	0	0	103.07
yciI	68.55	6.59	0.1	63.89	0.38	73.21	0	0	49.31	yciI	80.41	0	0	80.41	21.86	14.65	0	0	18.42
xylF	63.39	0	0	63.39	0	0	0	0	18.51	xylF	52.71	0	0	52.71	0.35	0	0	0	7.95
yfcJ	71.17	0	0	6.1	0	71.17	0	0	13.08	yfcJ	67.52	0	0	67.52	0.79	25.19	0	0	0
ydaO	NaN	NaN	NaN	30.22	0	0	0	0	4.35	ydaO	63.95	0	0	63.95	3.22	0	0	0	13.85
b1027	NaN	NaN	NaN	44.31	0	0	0	0	0	b1027	67.17	0	0	67.17	4.88	0	0	0	0
kdgR	92.5	2.29	0.02	90.79	37.38	91.62	0	0	95.1	kdgR	72.4	14.5	0.2	89.08	62.82	36.73	0	0	65.31
yhhT	NaN	NaN	NaN	37.34	0.93	28.19	0	0	30.07	yhhT	67.02	0	0	67.02	0.48	29.08	0	0	21.81
hcaT	117.74	13.12	0.11	127.02	37.39	40.44	0	0	108.46	hcaT	75.53	0	0	75.53	26.35	17.81	0	0	26.96
uxaC	NaN	NaN	NaN	31.8	0.7	0	0	0	29.06	uxaC	66.18	0	0	66.18	2.23	10.7	0	0	3.21
corA	671.88	123	0.18	800.74	679.47	796.75	523.44	528.89	701.98	corA	172.35	44.59	0.26	191.43	228.15	154.45	100.69	158.48	200.92
idnT	NaN	NaN	NaN	43.15	2.23	0	0	0	19.28	idnT	68.48	0	0	68.48	0	17.5	0	0	6.16
ydaG	NaN	NaN	NaN	27.2	0	0	0	0	5.08	ydaG	57.41	0	0	57.41	6.72	0	0	0	0
yceF	63.72	0	0	63.72	0	1.25	0	0	22.7	yceF	69.67	0	0	69.67	0.76	19.53	0	0	20.47
yabN	75.53	0	0	2.93	22.67	0	0	0	75.53	yabN	60.12	0	0	60.12	19.71	28.63	0	0	29.09
pheP	130.88	10.13	0.08	131.46	0	120.48	0	0	140.71	pheP	67.96	0	0	67.96	0	9.91	0	0	33.16
nanT	68.7	20.28	0.3	83.04	25.09	54.36	0	0	16.26	nanT	71.98	33.41	0.46	110.5	35.51	50.97	0	0	54.46
ppiA	70.47	0	0	70.47	0.4	42.2	0	0	49.13	ppiA	65.17	11.28	0.17	73.15	31.72	30.32	0	0	57.19
cysZ	79.79	7.6	0.1	85.17	0	0	0	0	74.41	cysZ	83.53	0	0	83.53	41.95	22.67	0	0	46.4
yjhF	72.19	0	0	72.19	0.59	0	0	0	5.23	yjhF	67.51	0	0	67.51	8.18	0	0	0	16.07
uspF	272.08	67.74	0.25	334.33	272.8	352.82	170.52	276.95	225.08	uspF	296.76	94.96	0.32	400.36	340.34	216.2	223.79	198.39	401.46
ycfQ	96.7	55.8	0.58	136.16	6.14	28.42	0	0	57.24	ycfQ	70.1	0	0	70.1	10.27	10.46	0	0	29.96
yebA	67.61	0	0	67.61	2.8	0	0	0	5.28	yebA	61.14	0	0	61.14	5.77	0	0	0	16.55
chaC	79.32	17.35	0.22	99.08	24.43	72.25	0	0	66.61	chaC	64.92	17.31	0.27	84.05	28.51	50.35	0	0	60.34
uhpT	NaN	NaN	NaN	49.52	0	0	0	0	0	uhpT	56.29	0	0	56.29	0.73	0	0	0	0
shiA	111.43	30.74	0.28	124.65	90.89	168.64	97.59	90.68	96.15	shiA	139.1	41.92	0.3	180.41	91.07	176.33	90.72	126.98	169.08
codB	1218.96	591.3	0.49	1980.42	1543.07	1633.39	647.89	495.67	1013.3	codB	66.87	16.84	0.25	62.7	90.42	50.44	0	47.3	63.94
dkgA	67.06	0	0	67.06	4.2	45.16	0	0	16.52	dkgA	72.69	19.6	0.27	86.54	27.37	37.23	0	0	58.83
yncJ	NaN	NaN	NaN	49.14	0	15.25	0	0	2.46	yncJ	50.39	0	0	50.39	0	5.67	0	0	20.91
b1142	NaN	NaN	NaN	47.62	1	0	0	0	8.28	b1142	61.68	0	0	61.68	0	0	0	0	0
ptsA	69.13	2.3	0.03	68.31	44.63	67.34	0	0	71.72	ptsA	67.17	0	0	67.17	14.87	33.87	0	0	49.3
nupG	74.5	19.69	0.26	65.51	9.54	97.08	0	0	60.92	nupG	69.86	0	0	69.86	33.1	12.07	0	0	37.97
uhpA	99.1	0	0	99.1	21.95	10.98	0	0	48.77	uhpA	79.18	0	0	79.18	10.56	9.9	0	0	12.2
yncG	74.32	0	0	74.32	0	35.64	0	0	3.66	yncG	93.58	31.2	0.33	142.81	86.54	71.75	0	64.2	102.59
mscL	115.33	52.22	0.45	176.15	59.51	138.86	3.52	0	86.81	mscL	131.32	33.82	0.26	184.22	124.13	95.07	113.05	0	140.12
yaaU	NaN	NaN	NaN	2.43	0	0	0	0	0	yaaU	71.46	0	0	71.46	0.56	0	0	0	0
yddE	136.97	34.51	0.25	179.41	127.93	96.47	0	0	144.07	yddE	92.51	21.24	0.23	113.09	70.66	45.28	0	0	93.79
ydhP	67.86	0	0	67.86	0.16	0	0	0	7.5	ydhP	65.1	0	0	65.1	0.94	0	0	0	7.72
gntP	59.5	0	0	59.5	0.8	0	0	0	21.51	gntP	61.61	0	0	61.61	3	0	0	0	10.19
yniA	65.06	7.77	0.12	70.56	0	59.57	0	0	37.84	yniA	60.79	0	0	60.79	31.8	16.26	0	0	43.42
ydcI	166.82	45.32	0.27	206.47	137.01	183.91	0	203.86	102.85	ydcI	73.41	16.59	0.23	92.4	75.83	55.16	0	57.76	85.91
glpA	55.06	0	0	55.06	0.87	0	0	0	0	glpA	53.88	0	0	53.88	6.44	0	0	0	3.44
gntT	91.32	5.55	0.06	95.25	0	0	0	0	87.4	gntT	NaN	NaN	NaN	39.07	35.38	12.82	0	0	36.85
ygbN	NaN	NaN	NaN	26.76	0	0	0	0	29.48	ygbN	67.15	0	0	67.15	0	0	0	0	21.81
yddM	207.02	118.64	0.57	200.05	139.4	411.74	0	116.49	167.39	yddM	100.28	33.32	0.33	74.03	89.06	42.99	0	41.09	137.77
U139	NaN	NaN	NaN	0	0	0	0	0	0	U139	NaN	NaN	NaN	0	0	0	0	0	0
ydcJ	NaN	NaN	NaN	0	3.56	0	0	0	19.56	ydcJ	58.69	0	0	0	58.69	0	0	0	25.46
ydjX	52.17	0	0	52.17	0	0	0	0	21.86	ydjX	53.04	0	0	53.04	0	0	0	0	15.13
wrbA	NaN	NaN	NaN	0	0	0	0	0	0	wrbA	NaN	NaN	NaN	0	0	0	0	0	0
fadL	134.75	76.84	0.57	223.42	46.51	87.5	0	0	93.34	fadL	67.43	0	0	67.43	34.41	19.96	0	0	12.08
zntA	68.6	0	0	46.09	0	7.14	0	0	68.6	zntA	69.61	0	0	69.61	12.11	0	0	0	19.76
b1403	115.44	47.37	0.41	185.36	80.31	99.3	0	0	96.8	b1403	124.51	40.46	0.32	166.26	48.64	85.49	0	0	121.8
cspD	175.09	93.91	0.54	138.96	69.07	308.25	0	129.82	229.37	cspD	191.21	102.05	0.53	147.61	158.19	153.09	0	124.81	372.34
b1172	112.95	68.65	0.61	64.41	22.59	0	0	0	161.49	b1172	73.15	0	0	73.15	11.14	0	0	0	26.31
rssA	101.33	38.66	0.38	168.33	89.04	76.93	0	74.25	98.09	rssA	84.29	29.6	0.35	117.3	52.45	88.26	0	55.53	107.9
yddW	94.26	54.99	0.58	133.14	0	55.37	0	0	47.89	yddW	72.91	0	0	72.91	0	27.34	0	0	33.95
ychJ	268.55	52.01	0.19	339.76	232.43	222.94	0	239.82	307.79	ychJ	98.59	34.36	0.35	137.7	83.81	65.05	0	73.12	133.25
nupC	224.82	93.17	0.41	312.36	121.06	171.77	0	0	294.07	nupC	85.57	27.16	0.32	108.24	71.5	54.22	0	0	108.32
lctP	57.71	0	0	57.71	0	0	0	0	11.68	lctP	NaN	NaN	NaN	40.54	15.03	0	0	0	8.46
Empty	NaN	NaN	NaN	0	0	0	0	0	0	Empty	NaN	NaN	NaN	0	0	0	0	0	0
ycaC	167.9	58.77	0.35	248.7	167.19	0	110.18	145.52	31.66	ycaC	118.55	20.87	0.18	120.39	125.29	0	121.02	84.51	141.54
ycgR	57.74	0	0	57.74	0	0	0	0	22.95	ycgR	69.09	0	0	69.09	0	0	0	0	5.37
ompW	52.1	0	0	0	26.35	0	0	0	52.1	ompW	NaN	NaN	NaN	0	6.25	47.95	0	0	17.3
yneE	325.9	125.03	0.38	453.58	323.93	289.4	0	424.32	138.28	yneE	144.25	40.7	0.28	178.92	77.1	160.41	0	136.31	168.52
yciC	98.13	32.61	0.33	97.2	70.68	80.43	0	0	144.2	yciC	61.12	14.09	0.23	71.09	6.55	48.12	0	0	51.16
yqeG	151.59	28.51	0.19	168.56	118.67	44.51	0	0	167.54	yqeG	85.83	31.32	0.36	117.76	55.15	36.04	0	0	84.59
rbsD	76.01	36.41	0.48	55.95	54.05	44.17	0	0	118.04	rbsD	58.24	0	0	39.7	58.24	9.98	0	0	48.55
mlc	98.6	16.54	0.17	114.95	79.34	94.26	116.56	87.87	0	mlc	74.69	14.69	0.2	3	34.18	86.19	58.14	79.75	0
ydiV	330.32	104.19	0.32	526.79	285.34	250.92	366.51	285.65	266.74	ydiV	243.87	91.4	0.37	244.28	159.36	194.79	274.76	180.93	409.09
yfgH	413.34	72.64	0.18	446.37	418.45	456.92	346.2	502.89	309.22	yfgH	148.23	42.29	0.29	137.73	108.85	228.54	131.39	156.47	126.38
manX	277.63	160.04	0.58	579.62	200.32	185.1	241.3	139.1	320.34	manX	137.54	113.28	0.82	28.34	89.41	117.61	81.38	62.27	337.04
panB	77.79	10.14	0.13	80.29	0	86.45	66.63	28.33	0	panB	72.17	0	0	8.13	0	72.17	42.8	15.59	0
kch	108.67	28.24	0.26	110.95	64.73	143.5	109.06	115.09	0	kch	94.25	32.37	0.34	59.38	63.19	125.51	126.29	96.89	0
grpE	206.65	69.42	0.34	326.13	192.77	233.87	189	117.89	180.24	grpE	142.6	42.43	0.3	203.9	115.68	183.16	102.49	143.3	107.06
lacZ	NaN	NaN	NaN	0	0	0	0	0	0	lacZ	NaN	NaN	NaN	0	0	0	0	0	0
pitB	201.44	165.97	0.82	392.41	91.96	0	119.96	0	0	pitB	828.46	229.76	0.28	1238.75	780.04	824.77	829.56	768.63	529.02
yeaE	99.59	0	0	46.59	36.45	99.59	49	17.67	0	yeaE	90.49	0	0	4.53	5.85	90.49	49.48	26.37	0
yfhR	80.13	20.99	0.26	65.29	16.67	94.97	42.36	0	0	yfhR	77.57	0	0	8.42	17.91	77.57	31.85	20.97	0
tyrP	240.54	120.41	0.5	203.98	145.79	418.73	115.33	356.15	203.27	tyrP	191.82	125.82	0.66	276.45	69.05	100.2	146.52	35.92	366.88
nagA	52.29	1.22	0.02	53.15	0	26.39	51.42	0	0	nagA	54.2	0	0	0.63	0	54.2	46.09	25.88	0
yciW	59.17	0	0	59.17	0	34.63	47.67	0	0	yciW	57.26	0	0	3	0	57.26	37.67	0	0
spy	NaN	NaN	NaN	43.06	0	0	10.33	0	0	spy	59.65	0	0	6.14	0	59.65	25.17	19.75	0
yegW	114.28	0	0	114.28	0	34.39	29.53	0	0	yegW	62.2	0	0	2.97	0	62.2	41.77	0	0
fecA	58.54	0	0	35.89	0	58.54	0	0	0	fecA	78.11	0	0	4.51	0	78.11	0	0	0
manY	76.45	9.98	0.13	83.5	32.2	36.83	69.39	0	0	manY	59.02	8.91	0.15	10.05	7.5	65.32	52.72	0	0
serA	NaN	NaN	NaN	0	0	0	0	0	0	serA	NaN	NaN	NaN	0	0	0	0	0	0
srlA	122.74	8.77	0.07	116.54	26.9	128.94	38.05	4.58	0	srlA	75.79	19.7	0.26	9.01	61.86	89.71	41.52	32.57	0
grxB	89.35	37.6	0.42	143.01	19.92	113.15	74.57	61.65	54.37	grxB	98.54	24.78	0.25	86.88	62.64	131.32	116.59	107.82	85.96
U66	NaN	NaN	NaN	0	0	0	0	0	0	U66	NaN	NaN	NaN	0	0	0	0	0	0
ydjF	153.97	46.94	0.3	192.93	97.07	210.64	127.72	141.49	0	ydjF	66.55	17.33	0.26	36.49	53.39	86.19	60.06	26.21	0
yehD	77.3	0	0	77.3	0	0	0	0	0	yehD	NaN	NaN	NaN	11	0	40.79	22.85	0	0
ychM	58.99	8.45	0.14	50.83	34.22	67.71	58.45	0	0	ychM	74.63	0	0	8.11	0	74.63	40.24	21.11	0
ygjI	71.88	8.95	0.12	65.55	0	78.21	49.89	0	0	ygjI	59.18	0	0	1.56	0	59.18	33.27	0	0
yfhL	369.33	101.15	0.27	501.81	458.44	407.7	315.87	263.1	269.08	yfhL	100.74	25.74	0.26	83.97	105	136.74	47.31	69.26	108.76
yahO	96.33	0	0	31.81	0	96.33	5.78	0	0	yahO	60.75	7.41	0.12	25.61	48.83	65.99	55.52	33.75	0
pdxH	182.56	46.36	0.25	267.62	190.71	165.57	179.94	160.56	130.94	pdxH	87.37	16.22	0.19	81.22	68.1	116.32	90.07	79.66	88.82
mpaA	71.87	15.26	0.21	61.09	0	49.86	49.45	82.66	0	mpaA	70.77	17.16	0.24	22	15.39	82.9	58.63	20.97	0
ydjL	77.99	0	0	39.55	0	77.99	45.35	0	0	ydjL	71.53	0	0	3	0	71.53	31.37	0	0
yehZ	92.42	9.4	0.1	99.07	0	85.78	42.54	13.1	0	yehZ	74.97	18.99	0.25	21.26	0	88.4	61.55	26.7	0
xasA	90.77	22.24	0.25	101.14	64.62	81.81	115.51	39.8	0	xasA	75.43	24.35	0.32	30.28	18.07	103.55	61.49	61.25	0
frlA	69.01	8.47	0.12	75	49.31	63.02	40.24	0	0	frlA	80.46	0	0	3.01	14.97	80.46	31.85	0	0
smpA	362.34	120.67	0.33	527.24	324.35	383.06	243.42	227.19	468.79	smpA	169.42	74.57	0.44	112.2	160.93	193.45	120.41	121.58	307.94
b1437	56.56	2.26	0.04	54.96	0	49.76	58.16	0	0	b1437	72.08	0	0	11.04	0	72.08	30.77	0	0
dcd	293.49	83.37	0.28	431.48	343.1	256.6	264.56	189.93	275.31	dcd	159.53	43.63	0.27	140.6	141.91	182.55	144.01	112.18	235.93
pinR	80.62	26.37	0.33	61.97	28.94	99.27	33.74	39.84	0	pinR	76.73	0	0	18.56	21.06	76.73	38.83	26.87	0
rrmA	80.32	23.52	0.29	77.15	54.01	118.67	75.33	76.41	0	rrmA	73.03	0	0	13.23	5.06	73.03	42.52	22.05	0
yeiC	75.57	9.31	0.12	82.15	7.87	68.98	22.31	0	0	yeiC	64.49	0	0	1.45	27.29	64.49	36.01	0	0
chbA	NaN	NaN	NaN	0	0	41.77	0	0	0	chbA	69.71	0	0	0	0	69.71	0	0	0
yeeR	NaN	NaN	NaN	11.75	0	36.05	11.75	0	0	yeeR	52.52	0	0	14.74	0	52.52	31.52	0	0
yfjI	NaN	NaN	NaN	19.56	0	21.17	0	0	0	yfjI	60.63	0	0	5.31	0	60.63	25.61	0	0
yncA	113.49	41.95	0.37	131.23	61.1	159.29	102.34	0	0	yncA	87.19	30.59	0.35	60.89	69.71	129.63	109.58	66.14	0
thiM	372.96	53.4	0.14	439.35	314.49	358.28	312.11	396.09	417.44	thiM	119.16	31.38	0.26	92.8	100.3	156.52	140.09	143.89	81.37
yddL	NaN	NaN	NaN	47.18	0	23.84	14.82	0	0	yddL	NaN	NaN	NaN	0.53	0	45.13	30.95	0	0
proQ	76.34	33.16	0.43	50.32	0	65.03	48.63	113.68	0	proQ	77.13	0	0	2.9	0	77.13	39.52	26.23	0
yciT	210.49	66.97	0.32	296.71	153.1	274.52	233.4	138.88	166.35	yciT	174.68	52.51	0.3	177.74	170.5	166.06	172.18	98.33	263.26
b1997	123.47	39.36	0.32	168.24	83.42	143.78	98.45	39.67	39.37	b1997	93.77	33.45	0.36	95.69	51.52	149.77	96.15	68.91	100.58
yeeV	NaN	NaN	NaN	0	0	48.6	33.63	0	0	yeeV	59.87	0	0	0	0	59.87	19.16	0	0
yqaD	79.06	17.25	0.22	87.35	35.75	98.6	59.9	70.37	0	yqaD	73.47	17.98	0.24	60.06	66.1	102.65	78.56	60	0
lsrR	66.94	15.3	0.23	82.18	30.11	67.07	51.58	0	0	lsrR	82.29	0	0	3.57	22.79	82.29	16.19	0	0
gshA	154.24	38.24	0.25	227.37	124.7	139	138.19	164.27	131.88	gshA	115.59	38.98	0.34	84.67	79.37	141.91	119.55	89.6	178.41
ydeQ	79.08	21.13	0.27	38.16	0	94.03	28.81	64.14	0	ydeQ	60.6	0	0	12.89	0	60.6	22.63	16.73	0
pphA	NaN	NaN	NaN	36.02	11.05	37.5	40.38	0	0	pphA	63.51	0	0	14.88	6.39	63.51	30.36	0	0
ydcR	109.43	28.05	0.26	129.27	41.63	89.6	46.56	40.35	0	ydcR	55.66	0	0	12.25	30.3	55.66	41.65	8.35	0
mtr	57.73	2.4	0.04	56.03	2.51	59.43	18.76	0	0.99	mtr	99	18.56	0.19	1.26	12.64	112.13	38.09	85.87	0.97
yegP	NaN	NaN	NaN	18.42	0	0	9.95	0	0	yegP	110.14	20.79	0.19	130.81	110.71	112.92	120.54	75.71	0
csiD	NaN	NaN	NaN	0	0	44.74	25.73	0	0	csiD	73.66	0	0	0	30.55	73.66	49.87	0	0
b0259	NaN	NaN	NaN	47.03	0	49.52	22.61	0	0	b0259	75.62	0	0	2.4	0	75.62	33.73	0	0
gntK	203.96	0	0	203.96	0	7.32	0	0	0	gntK	NaN	NaN	NaN	3	0	45.96	0	0	0
ydeV	NaN	NaN	NaN	5.49	0	20.74	0	0	0	ydeV	54.62	0	0	6.98	0	54.62	37.2	0	0
torY	NaN	NaN	NaN	0	0	44.13	0	0	0	torY	NaN	NaN	NaN	0	0	29.04	22.61	0	0
stfR	59.47	12.85	0.22	50.39	0	68.56	0	0	0	stfR	53.27	0	0	4.52	0	53.27	20.15	0	0
cadB	67.28	0	0	11.6	0	67.28	41.87	0	0	cadB	101.76	0	0	23.64	0	101.76	42.63	0	0
yfaD	NaN	NaN	NaN	0	0	0	0	0	0	yfaD	64.15	0	0	0	0	64.15	20.95	0	0
yncB	68.29	2.41	0.04	66.58	0	69.99	0.27	0	0	yncB	70.11	0	0	19.39	0	70.11	30.44	0	0
nagB	73.97	0	0	73.97	0	27.9	38.04	0	0	nagB	63.32	0	0	5.42	0	63.32	24.1	0	0
grxC	111.61	24.56	0.22	131.31	98.32	144.05	87.68	96.69	45.04	grxC	88.46	16.87	0.19	85.44	75.09	119.53	89.26	72.08	89.36
yneF	201.24	40.63	0.2	237.41	170.77	229.17	167.34	246.59	156.16	yneF	118.43	30.85	0.26	116.84	105.28	143.57	104.03	77.2	163.64
yaiN	NaN	NaN	NaN	3	0	0	0	0	0	yaiN	NaN	NaN	NaN	2.36	0	0	0	0	0
ynbA	88.53	8.34	0.09	82.63	0	94.43	21.04	0	0	ynbA	NaN	NaN	NaN	5.89	0	49.86	28.51	0	0
treB	57.38	0	0	57.38	0	5.83	0	0	0	treB	65.04	0	0	4.44	22.01	65.04	0	0	0
yfdG	429.8	131.34	0.31	671.5	423.47	338.73	343.89	328.48	472.75	yfdG	140.55	26.38	0.19	113.13	130.69	185.66	149.83	118.54	145.43
U139	NaN	NaN	NaN	0	0	0	0	0	0	U139	NaN	NaN	NaN	0	0	0	0	0	0
yoaE	64.53	0	0	39.55	0	64.53	37.24	0	0	yoaE	67.57	0	0	13.04	0	67.57	26.67	0	0
nrdD	79.2	0	0	47.5	2.82	79.2	10.92	2.79	7.19	nrdD	86.48	18.14	0.21	108.54	46.86	86.95	64.12	11.33	86.33
wrbA	NaN	NaN	NaN	0	0	0	0	0	0	wrbA	NaN	NaN	NaN	0	0	0	0	0	0
yeeX	178.65	36.45	0.2	214.3	141.63	204.89	137.28	195.17	0	yeeX	78.38	22.15	0.28	76.83	61.96	114.58	79.59	58.93	0
ydcG	67.65	23.93	0.35	42.02	44.71	84.57	50.74	0	0	ydcG	56.42	3.62	0.06	5.95	9.71	58.98	53.87	0	0
ydiU	114.97	51.3	0.45	23.38	48.49	138.98	56.06	149.86	0	ydiU	79.08	0	0	21.22	10.99	79.08	32.79	9.61	0
yfdQ	NaN	NaN	NaN	36.93	0	30.98	0.24	0	0	yfdQ	65.88	0	0	1.82	0	65.88	10.29	0	0
ego	63.18	0	0	0	0	63.18	0	0	0	ego	NaN	NaN	NaN	0	0	46.65	0	0	0
yecH	79.02	10.27	0.13	71.76	29.29	86.29	44.24	0	0	yecH	63.34	7.5	0.12	48.64	46.46	68.65	58.04	0	0
thiG	57.22	0	0	26.19	0	57.22	32.48	0	0	thiG	82.91	0	0	3	0	82.91	37.5	0	0
ydfI	63.43	0	0	29.02	0	31.12	63.43	0	0	ydfI	64.13	9.71	0.15	0.48	0	70.99	57.26	0	0
yeeE	241.48	131.98	0.55	448.24	98.53	263.6	316.57	111.9	210.05	yeeE	115.52	32.62	0.28	24.9	99.21	123.45	69.5	129.87	155.57
ydcM	207.99	42.45	0.2	278.91	178.49	212.56	195.67	174.31	0	ydcM	68.85	23.51	0.34	54.27	48.46	102.24	68.22	50.66	0
Empty	NaN	NaN	NaN	3	0	0	0	0	0	Empty	NaN	NaN	NaN	3	0	0	0	0	0
yffS	94.33	0	0	94.33	0	0	0.56	0	0	yffS	51.72	0	0	2.73	0	51.72	23.74	0	0
nagE	NaN	NaN	NaN	44.72	0	36.81	19.98	0	0	nagE	58.02	0	0	12.31	0	58.02	30.89	0	0
yahN	NaN	NaN	NaN	0	0	0	0	0	0	yahN	NaN	NaN	NaN	0	0	0	0	0	0
ychF	327.7	75.06	0.23	438.92	333.96	267.2	236.86	385.07	304.16	ychF	140.84	34.97	0.25	153.77	125.35	165.3	115.95	94.99	189.7
cspI	204.2	162.03	0.79	65.71	37.61	275.3	76.24	399.53	26.24	cspI	108.87	35.94	0.33	124.6	78.89	155.58	125.85	112.59	55.69
wcaJ	59.56	0	0	0	0	59.56	38.79	0	0	wcaJ	54.89	0	0	0	0	54.89	26.7	0	0
thiC	65.56	10.04	0.15	69.4	35.31	74.59	66.97	51.28	0	thiC	83.4	13.09	0.16	12.81	16.8	97.21	81.81	71.18	0
yhdJ	NaN	NaN	NaN	26.58	10.24	0	0	0	0	yhdJ	NaN	NaN	NaN	19.91	1.27	0	0	0	0
yibF	86.03	28.17	0.33	95.49	80.93	57.83	0	129.41	66.52	yibF	61.91	10.49	0.17	59.9	56.9	37.6	0	53.66	77.17
grxA	77.48	0	0	77.48	46.02	0	0	0	38.04	grxA	NaN	NaN	NaN	43.87	16.73	0	0	0	19.85
bcsE	92.05	24.87	0.27	37.18	102.21	120.89	0	81.48	63.62	bcsE	61.92	9.55	0.15	50.67	70.76	39.86	0	68.89	57.38
amiA	139.09	37.04	0.27	204.85	118.95	117.57	0	128.35	125.72	amiA	74.5	26.01	0.35	80.6	63.21	53.92	0	57.51	117.28
murB	88.48	21.6	0.24	101.52	63.55	0	0	0	100.38	murB	51.57	0	0	35.87	31.98	0	0	0	51.57
yjcD	361.49	114.12	0.32	555.24	367.81	279.97	0	281.68	322.76	yjcD	81.01	25.15	0.31	70.15	63.11	46.96	0	12.97	109.77
lacZ	NaN	NaN	NaN	0	0	0	0	0	0	lacZ	NaN	NaN	NaN	0	0	0	0	0	0
b3218	61.69	0	0	61.69	21.96	0	0	0	33.9	b3218	NaN	NaN	NaN	28.8	5.29	0	0	0	13.41
ampD	104.14	31.28	0.3	126.02	118.09	0	0	0	68.32	ampD	53.8	3.28	0.06	51.48	47.36	0	0	0	56.12
osmE	97.43	18.52	0.19	114.49	72.62	108.11	0	94.49	46.09	osmE	108.75	34.63	0.32	151.96	100.02	90.07	79.78	78.06	152.6
yiaG	112.45	26.28	0.23	112.54	110.51	81.24	0	145.52	41.41	yiaG	121.75	35.16	0.29	179.13	109	92.28	0	98.27	130.06
slp	209.85	98.42	0.47	158.79	345.39	82.3	214.57	248.23	46.94	slp	308.01	66.72	0.22	330.04	305.57	295.45	236.63	255.19	425.15
fimD	56.11	0.39	0.01	55.83	28.27	0	0	0	56.38	fimD	NaN	NaN	NaN	36.38	13.17	0	0	0	26.57
yjdK	NaN	NaN	NaN	25.44	11.06	0	0	0	0	yjdK	NaN	NaN	NaN	29.11	16.48	0	0	0	15.5
ompT	221.76	99.27	0.45	357.29	87.44	196.42	0	201.6	266.03	ompT	86.13	27.13	0.31	83.01	67.36	68.73	0	78.31	133.22
kefF	67.75	24.11	0.36	84.79	50.7	0	0	0	14.2	kefF	52.63	0	0	52.63	26.6	0	0	0	43.19
dgt	91.47	26.73	0.29	117.25	93.27	0	0	0	63.88	dgt	55.85	0	0	46.41	17.15	0	0	0	55.85
serA	NaN	NaN	NaN	0	0	0	0	0	0	serA	NaN	NaN	NaN	0	0	0	0	0	0
yiaU	75.93	0	0	75.93	24.74	0	0	0	43.32	yiaU	NaN	NaN	NaN	48.41	20.11	0	0	0	20.31
rfaD	207.46	40.71	0.2	257.21	182.46	245.91	0	181.01	170.72	rfaD	127.54	9.75	0.08	138.15	127.75	111.98	0	127.24	132.6
U66	NaN	NaN	NaN	0	0	0	0	0	0	U66	NaN	NaN	NaN	0	0	0	0	0	0
yjeI	107.97	46.82	0.43	145.92	46.1	150.76	0	72.35	62.85	yjeI	75.09	27.32	0.36	70.7	46.14	50.23	0	33.9	104.34
ompA	3682.22	1068.85	0.29	5609.5	3831	2437.89	3160.74	3758.66	3295.55	ompA	2583.99	570.73	0.22	3670.21	2332.6	2161.34	2289.82	2286.83	2763.18
dusB	421.64	117.67	0.28	586.97	489.33	308.48	301.31	351.04	492.71	dusB	149.15	20.87	0.14	171.64	126.19	149.99	40.05	130.15	167.78
ybjC	75.53	3.79	0.05	71.6	75.84	0	0	0	79.15	ybjC	51.97	1.37	0.03	51	52.94	0	0	0	32.9
yfaL	NaN	NaN	NaN	0	17.63	0	0	0	0	yfaL	NaN	NaN	NaN	0	10.22	0	0	0	8.56
pgmI	94.24	24.26	0.26	109.11	69.8	128.95	0	78.9	84.45	pgmI	61.95	13.97	0.23	51.43	56.62	47.8	0	18.37	77.81
murC	NaN	NaN	NaN	45.63	34.5	0	0	0	12.95	murC	NaN	NaN	NaN	20.34	13.17	0	0	0	19.42
yjbB	73.53	0	0	73.53	5.12	0	0	0	0	yjbB	NaN	NaN	NaN	35.7	5.91	0	0	0	22.29
yjeN	NaN	NaN	NaN	12.85	0	0	0	0	24.52	yjeN	NaN	NaN	NaN	32.1	11.1	0	0	0	13.92
hipB	274.56	84.93	0.31	430.52	263.53	183.76	235.4	296.47	237.66	hipB	155.52	59.57	0.38	214.56	167.88	110.95	95.27	109.25	235.19
ribC	117.86	16.91	0.14	127.67	110.25	98.03	0	0	135.49	ribC	59.17	0	0	59.17	18.59	37.83	0	0	45.11
fecI	186.05	120.44	0.65	146.74	167.02	92.44	420.73	185.73	103.64	fecI	706.28	196.46	0.28	939.86	512.48	826.26	715.93	811.36	431.81
pdxK	93.94	33.32	0.35	132.34	76.84	0	0	0	72.64	pdxK	65.49	3.53	0.05	63	40.64	0	0	0	67.99
yidL	67.65	0	0	67.65	0	0	0	0	15.98	yidL	NaN	NaN	NaN	42.73	0	0	0	0	9.62
mrcB	67.34	0	0	67.34	0.99	0	0	0	19.55	mrcB	NaN	NaN	NaN	39.34	16.99	0	0	0	18.64
yjbE	59.93	0	0	59.93	0	0	0	0	0	yjbE	NaN	NaN	NaN	31.68	13.78	0	0	0	0
b2861	76.48	24.19	0.32	93.59	59.38	0	0	0	0	b2861	73.7	3.71	0.05	71.07	48.3	0	0	0	76.32
uidC	60.36	0	0	60.36	0	0	0	0	18.8	uidC	NaN	NaN	NaN	22.51	0	0	0	0	16.56
thiL	NaN	NaN	NaN	31.83	32.44	0	0	0	0	thiL	NaN	NaN	NaN	31.06	15.56	0	0	0	0
yfeK	53.66	0	0	53.66	0	0	0	0	9.22	yfeK	NaN	NaN	NaN	35.55	0	0	0	0	19.38
ribB	675.31	127.34	0.19	855.01	674.32	689.77	0	661.47	495.97	ribB	391.04	74.8	0.19	468.67	391.39	359.6	0	283.25	452.26
yidS	NaN	NaN	NaN	32.66	0	0	0	0	23.44	yidS	NaN	NaN	NaN	44.94	0	0	0	0	22.2
fhuA	86.14	11.72	0.14	101.75	71.09	75.41	82.88	93.55	92.17	fhuA	143.33	43.1	0.3	227.32	135.96	113.74	143.76	129	110.2
yjbF	NaN	NaN	NaN	24.05	0	0	0	0	0	yjbF	NaN	NaN	NaN	32.92	7.38	0	0	0	0
yjeB	89.86	37.35	0.42	138.15	56.9	64.17	0	46.04	100.22	yjeB	74.59	24.38	0.33	90.68	54.55	35.06	0	52.97	100.18
cld	974.82	318.5	0.33	1461.58	755.36	547.71	883.95	1103.21	1097.11	cld	371.12	135.95	0.37	422.36	267.8	273.44	241.31	428.39	593.46
gst	101.1	9.96	0.1	108.7	107.86	103.57	0	101.21	84.16	gst	74.68	21.68	0.29	102.79	65.36	53.07	0	59.78	92.38
yqiC	239.74	53.37	0.22	331.58	198.24	239.04	0	216.13	213.72	yqiC	127.9	40.87	0.32	175.83	105.44	118.83	0	76.91	162.51
ggt	67.04	0	0	67.04	17.01	0	0	0	27.43	ggt	NaN	NaN	NaN	37.31	23.74	0	0	0	29.55
yidI	NaN	NaN	NaN	21.76	11.15	38.68	0	0	32.05	yidI	NaN	NaN	NaN	40.02	7.15	13.67	0	0	33.5
ompG	NaN	NaN	NaN	28.53	18.92	0	0	0	14.85	ompG	NaN	NaN	NaN	31.92	12.68	0	0	0	20.33
psiE	95.24	36.73	0.39	93.54	66.44	125.28	52.68	138.26	40.04	psiE	125.22	32.07	0.26	173.72	86.45	122.53	127.16	145.57	95.87
yjfI	423.42	208.03	0.49	808.72	516.8	297.73	272.83	311.09	333.35	yjfI	110.74	33.34	0.3	123.68	123.16	105.45	60.61	92.25	159.25
pbpG	116.52	60.35	0.52	204.67	89.2	69.4	0	0	102.79	pbpG	83.81	18.5	0.22	90.56	62.87	35.76	0	0	97.99
nrdB	NaN	NaN	NaN	0	0	0	0	0	0	nrdB	NaN	NaN	NaN	0	0	0	0	0	0
accB	405.46	47.6	0.12	467.14	391.35	442.67	0	356.78	369.35	accB	126.69	35.37	0.28	173.08	115.83	96.76	0	93.7	154.07
rhlB	89.97	22.9	0.25	116.19	79.86	0	0	0	73.86	rhlB	65.15	18.17	0.28	85.88	57.6	0	0	0	51.97
yaiB	106.45	0	0	106.45	35.55	0	0	0	44.38	yaiB	67.79	16.96	0.25	89.49	54.33	54.28	0	0	73.08
lpp	357.42	95.97	0.27	474.67	337.85	471.64	277.64	334.91	247.84	lpp	202.98	49.66	0.24	251.14	185.82	163.57	250.38	132.71	234.26
yjbJ	119.68	40.43	0.34	150.3	78.19	94.53	101.63	173.74	40.36	yjbJ	245.09	72.18	0.29	332.82	213.22	40.97	268.91	34.79	165.4
yjfK	60.48	8.28	0.14	66.34	32.68	0	0	0	54.62	yjfK	66.99	0	0	66.99	35.12	0	0	0	42.64
cirA	287.61	171.88	0.6	422.35	100.65	126.19	484.37	0	304.51	cirA	237.96	158.16	0.66	463.15	116.04	346.96	137.98	0	125.66
nrdH	NaN	NaN	NaN	22.54	23.89	24.15	0	13.17	39.32	nrdH	173.14	63.67	0.37	290.41	117.41	155.88	124.07	156.9	194.18
trxA	248.34	92.07	0.37	293.21	170.33	377.32	0	152.55	248.3	trxA	105.37	41.38	0.39	107.06	86.86	97.95	0	62.02	172.97
asd	498.55	109.38	0.22	483.24	416.66	606.28	453.28	654.86	376.95	asd	450.46	96.05	0.21	476.79	366.14	611.68	343.6	430.97	473.57
bolA	121.97	29.75	0.24	122.27	82.04	157.68	0	142.14	105.72	bolA	136.36	59.34	0.44	137.27	124.4	84.84	0	99.34	235.94
rcsA	62.95	8	0.13	57.3	38.61	1.01	0	0	68.61	rcsA	97.25	0	0	97.25	49.41	41.5	0	0	31.12
yjbI	NaN	NaN	NaN	3	0	0	0	0	0	yjbI	NaN	NaN	NaN	32.17	0	0	0	0	0
ytfI	NaN	NaN	NaN	11.93	12.01	0	0	0	18.37	ytfI	NaN	NaN	NaN	26.77	21.74	0	0	0	7.31
murA	NaN	NaN	NaN	0	0	0	0	0	14.64	murA	NaN	NaN	NaN	0	0	0	0	0	21.3
aceK	NaN	NaN	NaN	16.93	30.54	0	0	0	22.87	aceK	NaN	NaN	NaN	47.82	2.1	0	0	0	22.95
yhgN	74.3	0	0	74.3	48.32	0	0	0	36.84	yhgN	NaN	NaN	NaN	39.47	28.25	0	0	0	26.39
U139	NaN	NaN	NaN	0	0	0	0	0	0	U139	NaN	NaN	NaN	0	0	0	0	0	0
ompX	237.49	74.31	0.31	338.63	307.22	168.98	151.27	240.75	218.1	ompX	207.43	85.21	0.41	296.62	232.84	126.78	194.45	94.95	298.97
agn43	NaN	NaN	NaN	23.81	0.88	0	0	0	13.18	agn43	NaN	NaN	NaN	33.36	8.16	0	0	0	16.89
wrbA	NaN	NaN	NaN	0	0	0	0	0	0	wrbA	NaN	NaN	NaN	0	0	0	0	0	0
yjgJ	NaN	NaN	NaN	16.23	5.15	0	0	0	0	yjgJ	NaN	NaN	NaN	30.19	17.6	0	0	0	0
nanA	NaN	NaN	NaN	42.59	0	0	0	0	1.47	nanA	NaN	NaN	NaN	33.96	0	0	0	0	26.48
aphA	NaN	NaN	NaN	0	15.66	0	0	0	0	aphA	NaN	NaN	NaN	0	17.3	0	0	0	0
nadC	92.73	34.49	0.37	132.26	68.78	0	0	0	77.16	nadC	68.26	12.28	0.18	59.58	42.25	0	0	0	76.95
hdeD	185.42	105.03	0.57	307.78	283.15	91.37	105.31	247.07	77.87	hdeD	353.55	128.45	0.36	600.48	350.1	277.7	254.18	277.28	361.58
yedP	180.89	77.41	0.43	158.59	143.24	246.85	117.13	304.53	114.98	yedP	184.6	51.89	0.28	249.81	190.07	143.98	153.75	127.67	242.35
mltC	NaN	NaN	NaN	22.64	0	0	0	0	0	mltC	NaN	NaN	NaN	30.02	0	0	0	0	0
dusA	78.81	24.88	0.32	101.7	52.33	0	0	0	82.4	dusA	57.49	0	0	57.49	34.5	0	0	0	48.41
rcsF	118.32	31.9	0.27	165.74	96.87	98.79	0	93.18	137.01	rcsF	104.41	42.23	0.4	103.48	82.72	89	0	70.04	176.82
mreC	NaN	NaN	NaN	29.27	0	0	0	0	15.92	mreC	NaN	NaN	NaN	39.36	12.27	0	0	0	20.92
Empty	NaN	NaN	NaN	0	0	0	0	0	0	Empty	NaN	NaN	NaN	0	0	0	0	0	0
panD	522.26	105.75	0.2	637.55	578.78	516.32	371.11	605.55	424.23	panD	335.4	65.8	0.2	414.6	271.15	313.23	296.95	294.09	422.41
yhjC	67.35	0	0	67.35	34.37	0	0	0	35.28	yhjC	50.69	0	0	50.69	27.18	0	0	0	38.55
atoS	NaN	NaN	NaN	13.13	0	0	0	0	0	atoS	NaN	NaN	NaN	30.78	0	0	0	0	0
yidC	136.89	52.55	0.38	175.06	76.95	0	0	0	158.64	yidC	59	2.31	0.04	60.63	24.77	0	0	0	57.37
yjbQ	133.32	24.88	0.19	173.97	131.25	129.37	37.35	126.13	105.89	yjbQ	125.13	46.51	0.37	201.53	104.96	92.08	75.26	120.65	156.29
ybbB	NaN	NaN	NaN	37.79	18.98	0	0	0	0	ybbB	NaN	NaN	NaN	35.47	14.8	0	0	0	0
fadE	NaN	NaN	NaN	33.73	18.9	0	0	0	20	fadE	NaN	NaN	NaN	42.56	28.81	0	0	0	21.49
yhiL	200.72	87.9	0.44	369.4	197.17	115.74	172.83	194.62	154.54	yhiL	157.09	53.65	0.34	261.1	150.74	104.69	133.85	147.47	144.67
ddlA	225.53	109.44	0.49	414.91	278.84	97.45	171.33	192.58	198.08	ddlA	114.59	57.49	0.5	202.9	91.46	56.5	83.78	45.29	138.34
rpsL	4358.41	813.02	0.19	5684.83	4361.66	0	3657.62	4356.85	3731.1	rpsL	1576.75	470.37	0.3	2175.67	1211.28	0	1000.38	1718.96	1777.45
yfjG	201.67	94.47	0.47	349.61	161.76	139.26	0	118.51	239.19	yfjG	101.92	51.85	0.51	164.29	61.62	76.6	0	55.61	151.46
ygaQ	68.22	0	0	0	19.95	39.1	0	0	68.22	ygaQ	59.34	0	0	0	8.3	22.79	0	40.32	59.34
rrlG	106.6	77.23	0.72	161.21	28.77	9.95	0	5.77	51.99	rrlG	129.87	0	0	129.87	18.86	18.47	0	34.23	49.44
rrfC	134.72	0	0	134.72	0.61	0	0	0	0	rrfC	119.75	0	0	119.75	14.35	0	0	11.58	0
lacZ	NaN	NaN	NaN	0	0	0	0	0	0	lacZ	NaN	NaN	NaN	0	0	0	0	0	0
hdeA	163.47	118.87	0.73	300.51	101.63	19.05	0	0	88.26	hdeA	204.63	75.31	0.37	295.5	119.21	175.01	0	0	228.79
ybiF	109.2	78.86	0.72	164.96	0	0.54	0	7.94	53.44	ybiF	114.56	0	0	114.56	0	29.18	0	17.46	33.75
rrnG	NaN	NaN	NaN	0	0	0	0	0	0	rrnG	NaN	NaN	NaN	0	0	0	0	0	0
b2641	179.82	82.15	0.46	342.53	142.9	123.38	135.15	182.05	152.93	b2641	120.8	65.29	0.54	223.27	48.23	81.01	80.05	70.69	148.97
ygaV	89.87	16.99	0.19	0	78.36	72.36	0	106.19	102.55	ygaV	74.21	20.16	0.27	0	52.19	77.44	0	67.05	100.15
rpsG	148.42	0	0	148.42	19.24	0	0	4.03	49.55	rpsG	90.84	50.94	0.56	126.86	13.62	0	0	22.94	54.82
rrnA	5300.74	177	0.03	5047.29	5519.64	5240.89	5367.83	5180.16	5448.6	rrnA	857.79	375.47	0.44	675.86	628.87	674.5	745.28	808.96	1613.27
yiiR	117.89	85.89	0.73	178.62	0	0	0	0	57.16	yiiR	85.58	43.35	0.51	116.23	0	0	0	0	54.93
yhjB	96.43	62.61	0.65	140.7	0	0	0	0	52.16	yhjB	116.71	0	0	116.71	0	0	0	18.47	39.3
mipA	192.14	82.43	0.43	323.6	136.78	217.07	85.33	166.89	223.16	mipA	131.97	53.19	0.4	216.84	83	103.11	43.5	107.74	149.18
serA	NaN	NaN	NaN	0	0	0	0	0	0	serA	NaN	NaN	NaN	0	0	0	0	0	0
yqaE	101.17	74.7	0.74	211.36	54.44	55.28	0	44	83.59	yqaE	115.7	38.68	0.33	143.05	19.57	42.96	0	22.62	88.35
yqcE	NaN	NaN	NaN	0	0	0	0	0	48.69	yqcE	NaN	NaN	NaN	0	0	0	0	0	41.74
U66	NaN	NaN	NaN	0	0	0	0	0	0	U66	NaN	NaN	NaN	0	0	0	0	0	0
rrlA	130.1	0	0	130.1	32.38	0	0	44.7	48.6	rrlA	88.79	51.48	0.58	125.19	7.33	0	0	30.36	52.39
nudC	132.49	0	0	132.49	1.38	0	0	7.41	44.36	nudC	79.47	32.65	0.41	102.56	17.67	0	0	20.66	56.38
yhjR	190.18	55.52	0.29	276.8	140.52	145.16	0	206.47	181.96	yhjR	101.58	54.72	0.54	193.24	51.94	70.56	0	89.53	102.65
dsrA	2828.77	557.53	0.2	3526.98	2785.17	2678.05	2169.01	2361.44	3451.97	dsrA	1450.38	378.27	0.26	1387.28	1096.5	1273.47	1404.05	1353.44	2187.52
rpsP	2974.66	645.1	0.22	3991.61	3369.54	2551.02	2693.75	3058.16	2183.9	rpsP	627.29	185.48	0.3	821.32	548.87	749.58	322.25	566.1	755.62
ygcW	105.13	67.79	0.64	153.07	33.85	0	0	31.48	57.2	ygcW	118.95	0	0	118.95	21.72	0	0	31.93	47.69
csdA	104.15	20.17	0.19	0	89.26	36.83	0	96.09	127.11	csdA	82.42	27.31	0.33	0	44.31	43.36	0	63.11	101.74
rmf	340.47	126.61	0.37	446.37	209.46	458.1	159.71	410.8	358.38	rmf	554.31	205.85	0.37	573.4	343.44	604.03	334.76	575.47	894.76
rrnB	6002.39	1407.13	0.23	8242.36	5860.76	3823.31	6299.81	5860.37	5927.71	rrnB	989.93	337.27	0.34	1215.58	761.18	657.53	894.2	849.97	1561.13
rimJ	129.45	86.09	0.67	298.19	82.78	131.86	65.42	83.84	114.63	rimJ	97.16	61.16	0.63	187.32	54.13	53.08	40.22	56.69	134.57
yiaF	368.85	180.76	0.49	666.15	422.61	249.26	293.34	149.59	432.14	yiaF	254.76	125.3	0.49	328.67	241.46	154.1	164.86	167.73	471.73
rcsC	127.53	77.98	0.61	240.2	63.54	46.53	0	91.61	114.79	rcsC	117.16	33.64	0.29	140.95	24.02	31.23	0	33.3	93.38
rpsO	873.05	201.48	0.23	1143.93	911.05	815.2	563.96	784.62	1019.53	rpsO	293.14	122.47	0.42	325.8	209.81	233.83	141.94	366.74	480.73
ygcF	163.28	99.61	0.61	271.73	75.86	0	0	2.63	142.26	ygcF	122.65	74.66	0.61	175.44	48.17	22.41	0	23.21	69.86
ygeF	60.56	0	0	0	0	0	0	0	60.56	ygeF	50.93	0	0	0	0	21.39	0	24.58	50.93
rrnH	6540.52	1555.15	0.24	8991.19	6832.09	4214.93	6590.95	5816.21	6797.72	rrnH	827.8	347.98	0.42	926.71	717.38	526.06	781.48	546.27	1468.92
rrfB	126.75	0	0	126.75	0	0	0	0	0	rrfB	124.48	0	0	124.48	8.72	0	0	0	0
rpsU	1381.99	410.62	0.3	1733.54	1267.78	955.32	867.89	1654.11	1813.27	rpsU	307.2	169.24	0.55	367.38	231.04	238.38	124.2	268.34	613.88
yiaJ	160.33	92.51	0.58	265.49	91.5	18.75	0	0	123.99	yiaJ	116.45	43.92	0.38	147.51	38.19	29.14	0	14.18	85.39
ypeA	280.03	81.9	0.29	436.92	293.45	215.96	220.84	252.6	260.41	ypeA	168.81	61.82	0.37	263.41	171.46	116.62	114.37	126.48	220.53
rrfD	101.23	53.31	0.53	138.92	0	0	0	0	63.54	rrfD	112.74	0	0	112.74	0	0	0	0	45.27
ygdI	99.01	62.41	0.63	143.14	15.45	0	0	0	54.88	ygdI	129.76	0	0	129.76	13.35	0	0	0	45.91
yjiM	50.52	0	0	0	0	0	0	0	50.52	yjiM	NaN	NaN	NaN	0	0	0	0	0	49.22
rrlH	120.55	92.68	0.77	186.09	0	0	0	16.05	55.02	rrlH	98.96	40.59	0.41	127.67	0	0	0	10.59	70.26
rplL	114.76	73.3	0.64	194.97	30.12	0	0	51.24	98.08	rplL	95.18	38.6	0.41	122.48	26.8	0	0	32.3	67.88
rrnC	8532.62	2399.43	0.28	6160.23	10675	6432.64	7004.21	8982.17	11941.5	rrnC	1950.65	999.91	0.51	1015.79	1832.63	1952.11	1241.11	1816.94	3845.34
yiaT	114.45	76.76	0.67	168.73	0	0	0	0	60.17	yiaT	120.78	0	0	120.78	0	0	0	0	41.89
hofM	134.09	87.01	0.65	195.61	0	0	0	0	72.56	hofM	93.26	45.6	0.49	125.5	0	0	0	0	61.01
rrlD	99.62	61.44	0.62	170.55	0	0	0	62.97	65.34	rrlD	88.07	50.5	0.57	123.78	0	0	0	25	52.37
yqeK	155.79	0	0	155.79	29.2	17.9	0	0	43.94	yqeK	93.65	52.54	0.56	170.8	75.09	52.75	0	30.22	75.97
yjiA	55.31	0	0	0	0	0	0	0	55.31	yjiA	NaN	NaN	NaN	0	0	0	0	0	41.83
rrfH	146.6	0	0	146.6	0	0	0	37.75	31.13	rrfH	113.93	0	0	113.93	0	0	0	25.95	43.04
rrfE	125.02	0	0	125.02	22.21	0	0	0	40.21	rrfE	116.5	0	0	116.5	8.72	0	0	16.67	37.98
dgoR	110.17	75.02	0.68	163.22	18.68	0	0	20.45	57.13	dgoR	93.77	42.58	0.45	123.89	23.53	0	0	21.58	63.66
yidK	97.56	64.43	0.66	143.12	0	0	0	0	51.99	yidK	115.13	0	0	115.13	0	0	0	0	37.34
b3505	119.07	92.46	0.78	184.46	48.14	0	0	25.64	53.69	b3505	100.37	44.89	0.45	132.11	28.5	0	0	19.6	68.63
rpsM	4002.43	609.24	0.15	4941.18	3567.85	3197.86	3844.82	4165.51	4297.35	rpsM	1230.53	248.87	0.2	1533.08	1083.15	1131.54	871.19	1306.08	1458.11
sseA	120.5	75.06	0.62	173.58	0	0	0	0	67.43	sseA	129.07	0	0	129.07	0	0	0	0	42.89
yjiX	93.09	26.97	0.29	0	65.27	7.97	0	94.87	119.13	yjiX	72.49	36.98	0.51	0	51.17	40.99	0	51.1	115.19
rpsA	292.39	187.23	0.64	466.24	204.72	118.3	0	151.77	520.94	rpsA	169.69	33.06	0.19	146.32	20.42	31.11	0	48.02	193.07
rrlB	84.95	52.72	0.62	145.78	0	0	0	56.52	52.56	rrlB	127.44	0	0	127.44	0	0	0	4.92	49.74
yieG	320.7	74.03	0.23	439.84	238.88	325.2	253.56	362.2	304.52	yieG	134.01	49.78	0.37	217.33	92.15	99.76	29.91	127.35	133.45
yidR	188.29	0	0	188.29	0	0	0	0	35.7	yidR	121.81	0	0	121.81	0	0	0	0	42.82
htrL	262.72	83.5	0.32	426.02	234.13	216.3	194.23	239.89	265.75	htrL	123.75	54.57	0.44	216.75	89.07	100.89	72.11	102.55	161.15
rplN	8484.57	1421.28	0.17	10617.9	8602.43	7913.93	6255.41	8971.01	8546.76	rplN	2360.61	492.69	0.21	2870.98	1978.58	2353.76	1622.17	2479.82	2858.35
yphH	120.41	73.76	0.61	229.33	65.94	0	0	91.22	95.13	yphH	100.44	52.9	0.53	158.29	54.51	0	0	45.11	88.53
yjiJ	68.83	9.66	0.14	0	37.77	57.96	0	76.43	72.1	yjiJ	69.11	0	0	0	20.72	14.73	0	33.93	69.11
rimL	133.04	77.29	0.58	271.6	89.45	65.26	73.94	158.33	139.69	rimL	97.02	57.69	0.59	192.9	63.09	53.2	50.66	80.94	141.34
rrlE	119.7	87.75	0.73	181.76	23.1	0	0	0	57.65	rrlE	88.01	48.08	0.55	122.01	15.36	0	0	0	54.02
yihU	110.23	67.93	0.62	158.26	23.05	0	0	16.21	62.2	yihU	103.13	38.66	0.37	130.46	37.87	0	0	18.35	75.8
yidH	167.47	74.92	0.45	260.09	97.71	2.08	0	116.47	195.6	yidH	122.6	64.39	0.53	177.85	47.29	51.88	0	29.81	138.07
rplT	101.38	67.92	0.67	149.41	0	0	0	0	53.35	rplT	89.2	54.11	0.61	127.46	0	0	0	0	50.95
U139	NaN	NaN	NaN	0	0	0	0	0	0	U139	NaN	NaN	NaN	0	0	0	0	0	0
smpB	261.69	88.61	0.34	433.18	277.94	210.26	204.9	205.3	238.59	smpB	146.01	76.75	0.53	271.82	105.06	93.28	89.35	105.1	211.46
yjjL	61.73	0	0	0	0	0	0	0	61.73	yjjL	NaN	NaN	NaN	0	0	0	0	0	44.57
wrbA	NaN	NaN	NaN	0	0	0	0	0	0	wrbA	NaN	NaN	NaN	0	0	0	0	0	0
yidX	156.95	0	0	156.95	0	0	0	0	50	yidX	119.61	0	0	119.61	19.95	0	0	9.73	34.78
yiiQ	154.18	71.45	0.46	240.39	132.11	89.4	90.05	3.35	218.93	yiiQ	111.58	58.37	0.52	176.59	69.02	68.59	21.82	69.28	174.44
yajG	742.47	131.57	0.18	0	798.09	556.68	664.22	803.17	890.18	yajG	236.23	87.38	0.37	0	244.1	167.27	209.17	177.55	383.03
rpmI	111.13	59.98	0.54	153.54	0	0	0	6.65	68.72	rpmI	90.73	42.22	0.47	120.58	0	0	0	22.55	60.87
yfhM	68.33	14.39	0.21	63.4	50.39	41.66	0	82.41	77.12	yfhM	109.62	53.44	0.49	147.41	24.57	26.04	0	45.1	71.84
yfjW	184.67	72.82	0.39	311.5	158.15	172.68	126.81	0	154.21	yfjW	151.01	59.74	0.4	248.06	106.5	111.03	120.26	0	169.23
rpsJ	1955.47	604.92	0.31	0	1831.62	1658.09	1483.1	1795.03	3009.53	rpsJ	636.37	354.94	0.56	0	528.59	564.12	250.34	621.19	1217.61
rplY	4233.32	1141.97	0.27	6285.26	4512.36	2936.77	3695.56	3721.71	4248.28	rplY	724.96	308.04	0.42	941.48	620.67	694.84	212.31	766.6	1113.85
yieH	111.11	42.44	0.38	141.12	25.2	0	0	40.77	81.1	yieH	88.8	43.15	0.49	119.31	20.72	0	0	23.36	58.28
sthA	316.8	107.82	0.34	523.1	317.39	259.88	265.9	316.39	218.13	sthA	130.11	66.74	0.51	221.13	96.77	63.08	76.88	119.03	203.76
Empty	NaN	NaN	NaN	0	0	0	0	0	0	Empty	NaN	NaN	NaN	0	0	0	0	0	0
rrfG	94.92	47.9	0.5	128.79	19.86	0	0	9.67	61.06	rrfG	89.1	48.5	0.54	123.39	21.31	0	0	22.49	54.8
yphG	56.94	0	0	56.94	0	0	0	0	34.26	yphG	115.22	0	0	115.22	0	0	0	0	42.76
b2651	118.12	54.79	0.46	166.9	21.76	0	0	128.61	58.84	b2651	126.95	0	0	126.95	32.3	0	0	13.05	42.03
rpmB	2033.56	485.44	0.24	2450.27	1906.28	1611.5	1587.4	1851.92	2793.99	rpmB	450.45	188.88	0.42	667.74	390.62	373.02	222.19	353.52	695.59
ssrA	101.04	71.03	0.7	151.26	6.11	0	0	0	50.82	ssrA	92.43	51.21	0.55	128.64	8.36	0	0	0	56.23
fabR	231.41	85.47	0.37	377.35	214.18	169.06	0	170.55	225.93	fabR	96.83	48.52	0.5	162.35	65.7	45.32	0	55.04	104.21
rsd	3563.1	660.83	0.19	4825.05	3225.18	3238.75	3345.17	3726.61	3017.83	rsd	1474.46	290.04	0.2	1649.82	1288.9	1251.1	1305.91	1362.21	1988.8
mdtH	68.89	0	0	0	31.55	0	68.89	0.78	0	mdtH	53.82	0	0	0	34.34	0	53.82	48.92	0
malF	80.75	27.77	0.34	0	46.48	0	100.39	61.11	0	malF	58.93	0	0	0	37.6	0	42.87	58.93	0
lacZ	NaN	NaN	NaN	0	0	0	0	0	0	lacZ	NaN	NaN	NaN	0	0	0	0	0	0
oxyR	238.8	58.88	0.25	0	203.83	0	205.8	306.78	0	oxyR	74.59	20.69	0.28	0	56.41	0	70.25	97.11	0
araB	70.84	22.31	0.31	0	86.62	0	8.92	55.06	0	araB	64.02	7.56	0.12	0	18.24	0	58.67	69.36	0
leuA	84.44	0	0	0	32.86	0	84.44	30.49	0	leuA	67.94	16.22	0.24	0	35.38	0	56.47	79.4	0
hemC	117.23	34.38	0.29	0	122.03	0	140.37	139.28	67.22	hemC	94.36	10.18	0.11	0	89.85	0	83.77	107.58	96.26
lacZ	NaN	NaN	NaN	0	0	0	0	0	0	lacZ	NaN	NaN	NaN	0	0	0	0	0	0
ygjD	164.61	32.26	0.2	0	164.28	0	182.79	191.96	119.4	ygjD	86.39	14.16	0.16	0	82.55	0	95.92	99.02	68.05
flgM	121.56	24.11	0.2	0	121.28	0	97.6	145.82	0	flgM	87.88	27.27	0.31	0	59.19	0	113.45	91.02	0
motA	65.33	13.23	0.2	0	50.16	0	71.37	74.47	0	motA	77.05	13.2	0.17	0	17.18	0	86.38	67.71	0
araE	61.56	0	0	0	61.56	0	25.2	36.82	0	araE	72.97	6.88	0.09	0	27.76	0	77.84	68.1	0
glnA	243.1	109.64	0.45	0	253.43	0	128.66	347.2	0	glnA	72.07	11.87	0.16	0	32.43	0	63.67	80.46	0
rpoH	557.21	214.04	0.38	493.35	624.76	368.53	279.1	777.01	800.47	rpoH	320.75	45.45	0.14	327.1	295.12	275.5	355.65	281.12	390.01
pstS	114.78	21.55	0.19	0	86.21	0	119.94	114.72	138.25	pstS	76.4	11.36	0.15	0	66.31	0	74.21	43.72	88.7
lacI	296.87	124.33	0.42	0	388.36	90.97	363.37	373.25	268.41	lacI	150.23	44.73	0.3	0	194.08	115.73	117.05	120.28	204
yjfY	67.49	13.12	0.19	0	52.83	0	78.12	71.52	0	yjfY	78.76	13.22	0.17	0	44.68	0	69.41	88.11	0
rhaT	82.48	2.97	0.04	0	79.26	0	85.11	83.06	0	rhaT	81.82	8.76	0.11	0	13.17	0	88.01	75.63	0
serA	NaN	NaN	NaN	0	0	0	0	0	0	serA	NaN	NaN	NaN	0	0	0	0	0	0
rhaD	60.9	11.92	0.2	0	69.32	0	46.23	52.47	0	rhaD	64.36	1.23	0.02	0	23.92	0	65.23	63.48	0
ligB	72.73	23.62	0.32	0	15.95	0	89.43	56.03	0	ligB	68.57	13.16	0.19	0	20.04	0	77.87	59.26	0
U66	NaN	NaN	NaN	0	0	0	0	0	0	U66	NaN	NaN	NaN	0	0	0	0	0	0
fliA	76.8	23.16	0.3	0	62.1	0	103.5	64.81	0	fliA	NaN	NaN	NaN	0	22.65	0	14.55	40.86	0
dsdC	NaN	NaN	NaN	0	41.02	0	45.84	30.45	0	dsdC	58.42	3.81	0.07	0	39.41	0	61.12	55.73	0
rrnD	8706.05	1380.66	0.16	10934.9	8818.04	6638.15	8954.5	8249.3	8641.43	rrnD	1102.45	781.52	0.71	672.1	1256.93	950.18	520.6	614.21	2600.68
relA	77.37	9.22	0.12	0	0	0	83.88	70.85	0	relA	67.49	5.16	0.08	0	26.48	0	63.84	71.14	0
ompR	92.35	29.48	0.32	0	99.66	0	117.49	59.9	0	ompR	89.62	5.56	0.06	0	33.46	0	85.69	93.55	0
tar	71.87	30.42	0.42	0	93.38	0	50.36	23.93	0	tar	93.72	0	0	0	27.52	0	93.72	48.49	0
araD	63.89	0	0	0	63.89	0	33.88	26.09	0	araD	66.28	20.79	0.31	0	27.03	0	51.58	80.98	0
hlyE	58.75	3.95	0.07	0	61.54	0	40.53	55.96	0	hlyE	88.67	0	0	0	25.33	0	35.04	88.67	0
rpoE	166.88	86.16	0.52	0	59.73	86.98	223.05	239.72	224.92	rpoE	194.68	34.43	0.18	0	184.65	154.53	246.65	181	206.59
fliY	417.78	180.16	0.43	0	219.78	372.1	592.39	285.49	619.16	fliY	206.47	91.58	0.44	0	305.91	87.43	208.44	146.98	283.6
ftsZ	64.55	10.45	0.16	0	67.03	0	73.54	53.08	0	ftsZ	74.64	0	0	0	43.71	0	40.59	74.64	0
uvrC	67.38	1.62	0.02	0	66.24	0	68.52	0	0	uvrC	51.04	0	0	0	30.09	0	51.04	0	0
relB	74.16	16.59	0.22	0	63.73	0	93.29	65.46	0	relB	64.53	9.61	0.15	0	26.88	0	57.73	71.32	0
ompC	1554.23	1123	0.72	3283.53	1954.28	784.07	0	440.39	1308.91	ompC	1669.81	757.95	0.45	2942.35	2024.81	1315.99	1766.22	820.54	1148.93
gpp	75.85	5.3	0.07	0	79.59	0	37.29	72.1	0	gpp	89.64	35.87	0.4	0	51.46	0	122.63	94.83	0
yiiU	448.37	18.1	0.04	0	448.69	0	451.66	468.53	424.59	yiiU	206.08	21.95	0.11	0	207.08	0	197.93	183.66	235.67
recA	236.78	14.38	0.06	0	248.74	0	227.12	249.44	221.81	recA	100.12	31.21	0.31	0	78.74	0	134.29	118.38	69.07
malI	94.66	16.41	0.17	0	83.06	0	106.27	44.63	0	malI	53.44	1.3	0.02	0	54.37	0	48.06	52.52	0
fliF	NaN	NaN	NaN	0	6.56	0	45.09	0	0	fliF	NaN	NaN	NaN	0	32.89	0	22.78	21.45	0
ihfB	251.75	69.52	0.28	0	308.23	0	243.78	298.44	156.55	ihfB	179.19	41.45	0.23	0	155.59	0	167.47	153.05	240.64
uvrY	138.49	3.24	0.02	0	135.26	0	138.47	141.74	0	uvrY	90.67	10.77	0.12	0	90.8	0	101.37	79.84	0
ndk	77.77	25.28	0.33	0	56.83	0	105.85	70.63	0	ndk	NaN	NaN	NaN	0	25.04	0	45.47	40.25	0
polB	87.24	21.47	0.25	0	95.41	0	103.42	62.88	0	polB	71.07	2.1	0.03	0	24.91	0	72.56	69.59	0
araC	103.6	11.34	0.11	0	105.39	0	113.94	91.47	0	araC	63.55	13.07	0.21	0	54.19	0	57.97	78.48	0
arcB	72.82	4.82	0.07	0	69.41	0	76.23	40.1	0	arcB	63.99	13.02	0.2	0	73.2	0	48.82	54.78	0
galP	NaN	NaN	NaN	0	0	0	33.96	0.92	0	galP	NaN	NaN	NaN	0	38.26	0	26.48	18.03	0
phoR	NaN	NaN	NaN	0	0.99	0	39.1	0	0	phoR	NaN	NaN	NaN	0	21.07	0	30.48	0	0
cynT	NaN	NaN	NaN	0	0	0	0	0	0	cynT	NaN	NaN	NaN	0	23.54	0	0	0	0
cyaA	759.48	133.01	0.18	756.61	789.32	668.84	676.61	1008.45	657.05	cyaA	475.53	134.52	0.28	473.49	397.02	361.75	514.93	382.96	723.01
ruvA	129.7	2.41	0.02	0	132.34	0	129.16	127.61	0	ruvA	71.89	15.43	0.21	0	88.49	0	69.19	57.98	0
uvrD	88.62	4.88	0.06	0	94.15	0	84.94	86.77	0	uvrD	53.58	0	0	0	43.16	0	53.58	45.64	0
gltB	80.06	5.69	0.07	0	76.04	0	84.09	43.34	0	gltB	68.56	18.37	0.27	0	16.4	0	55.57	81.54	0
malX	71.98	29.19	0.41	0	51.34	0	92.62	27.63	0	malX	60.55	0	0	0	46.09	0	45.72	60.55	0
rpsT	1778.5	617.02	0.35	2626.28	1658.65	756.69	1964.35	2039.85	1625.18	rpsT	506.05	160.77	0.32	566.17	603.95	404.07	231.87	557.4	672.86
clpX	127.53	20.6	0.16	0	104.17	0	135.3	143.1	15.19	clpX	105.11	16.32	0.16	0	109.68	0	122.37	83.19	105.2
flgB	NaN	NaN	NaN	0	0	0	0.57	0	0	flgB	NaN	NaN	NaN	0	0	0	19.5	0	0
rhaS	NaN	NaN	NaN	0	0.98	0	2.8	18.69	0	rhaS	NaN	NaN	NaN	0	18.24	0	33.02	18.39	0
rpoD	NaN	NaN	NaN	0	7.04	0	0	0.11	0	rpoD	NaN	NaN	NaN	0	26.54	0	0	19.7	0
dnaK	80.59	19.58	0.24	0	48.64	0	66.75	27.06	94.44	dnaK	58.08	7.24	0.12	0	63.2	0	37.82	52.96	48.01
dnaJ	87.34	18.51	0.21	0	66.71	0	92.81	102.49	0	dnaJ	77.53	0	0	0	27.99	0	42.79	77.53	0
phoA	NaN	NaN	NaN	0	1.11	0	0.44	0	0	phoA	NaN	NaN	NaN	0	27.95	0	8.03	0	0
ubiG	70.64	7.35	0.1	0	62.16	0	75.22	74.53	0	ubiG	57.9	0	0	0	57.9	0	19.75	48.68	0
yebB	NaN	NaN	NaN	0	0.75	0	1.8	0	0	yebB	NaN	NaN	NaN	0	29.53	0	8.03	0	0
htpG	99.69	15.41	0.15	0	110.33	0	113.91	80.65	93.86	htpG	79.69	13.84	0.17	0	94.97	0	66.81	69.2	87.76
chaB	83.67	0	0	0	28.95	0	0	83.67	0	chaB	58.03	0	0	0	23.48	0	0	58.03	0
dsdX	NaN	NaN	NaN	0	8.02	0	0	0	0	dsdX	NaN	NaN	NaN	0	38.79	0	0	0	0
gmk	367.43	32.73	0.09	0	357.22	0	336.63	413.62	362.24	gmk	203.65	54.44	0.27	0	188.88	0	163.85	178.03	283.86
groE	112.16	39.38	0.35	0	67.22	0	140.6	32.36	128.67	groE	79.26	23.08	0.29	0	71.81	34.85	76.99	111.41	56.83
lon	169.31	71.23	0.42	0	217.11	54.58	229.87	196.58	148.42	lon	114.32	14.23	0.12	0	123.4	93.61	111.17	131.17	112.27
phoB	57.89	9.66	0.17	0	52.99	0	69.01	51.66	0	phoB	57.49	0	0	0	41.59	0	30.85	57.49	0
fliE	NaN	NaN	NaN	0	16.27	0	30.53	0	0	fliE	NaN	NaN	NaN	0	44.6	0	19.71	13.54	0
yjjY	NaN	NaN	NaN	0	35.96	0	0	0	0	yjjY	NaN	NaN	NaN	0	38.48	0	15.48	25.7	0
U139	NaN	NaN	NaN	0	0	0	0	0	0	U139	NaN	NaN	NaN	0	0	0	0	0	0
fliL	55.77	0	0	0	10.28	0	55.77	0	0	fliL	NaN	NaN	NaN	0	42.12	0	4.52	0	0
ybeL	53	0	0	0	35.1	0	0.82	53	0	ybeL	70.35	26.87	0.38	0	89.35	0	51.35	47.52	0
wrbA	NaN	NaN	NaN	0	0	0	0	0	0	wrbA	NaN	NaN	NaN	0	0	0	0	0	0
yecF	NaN	NaN	NaN	0	4.94	0	24.61	0	0	yecF	58.27	0	0	0	58.27	0	24.34	40.15	0
clpP	241.65	28.11	0.12	0	0	0	239.39	270.82	214.75	clpP	149.57	37.54	0.25	0	0	0	136.25	120.51	191.95
gyrB	70.34	0	0	0	20.92	0	70.34	26.42	0	gyrB	69.19	0	0	0	69.19	0	43.77	37.65	0
cynR	NaN	NaN	NaN	0	3.39	0	0	23.13	0	cynR	NaN	NaN	NaN	0	40.95	0	0	44.26	0
argU	NaN	NaN	NaN	0	0	0	0	0	0	argU	NaN	NaN	NaN	0	0	0	0	0	0
greB	53.73	0	0	0	53.73	0	46.52	24.76	0	greB	64.81	0	0	0	64.81	0	47.89	24.58	0
sodA	88.41	22.22	0.25	0	46.01	0	72.71	104.12	0	sodA	53.1	2.56	0.05	0	54.91	0	39.2	51.28	0
lexA	77.54	10.95	0.14	0	64.9	0	83.62	84.09	0	lexA	NaN	NaN	NaN	0	27.87	0	42.92	40.97	0
umuD	NaN	NaN	NaN	0	2.15	0	37.05	0	0	umuD	NaN	NaN	NaN	0	36.77	0	28.35	0	0
yeaH	NaN	NaN	NaN	0	0.74	0	0	0	0	yeaH	NaN	NaN	NaN	0	32.18	0	22.86	25.15	0
Empty	NaN	NaN	NaN	0	0	0	0	0	0	Empty	NaN	NaN	NaN	0	0	0	0	0	0
ydfV	NaN	NaN	NaN	0	0	0	0	0	0	ydfV	NaN	NaN	NaN	0	42.18	0	21.83	0	0
garD	NaN	NaN	NaN	0	0.27	0	0	0	0	garD	NaN	NaN	NaN	0	38.57	0	0	0	0
katG	NaN	NaN	NaN	0	0	0	0	0	0	katG	NaN	NaN	NaN	0	0	0	0	0	0
rhaB	NaN	NaN	NaN	0	0.39	0	0	0	0	rhaB	NaN	NaN	NaN	0	23.75	0	21.7	0	0
rpoS	NaN	NaN	NaN	0	0	0	0	0	0	rpoS	NaN	NaN	NaN	0	23.6	0	0	0	0
trpL	NaN	NaN	NaN	0	1.2	0	39.42	0	0	trpL	661.78	227.93	0.34	0	37.91	500.61	0.51	822.96	0
ssb	215.38	12.79	0.06	0	221.03	0	217.51	226.06	196.93	ssb	107.51	24.09	0.22	0	124.9	0	75.78	101.84	127.5
